# Supplementary material for: Long non-coding RNAs ENST00000429730.1 and MSTRG.93125.4 are associated with metabolic activity in tuberculosis lesions of sputum-negative tuberculosis patients
Source: publisher site journal article supplement (doi:10.18632/aging.202634), 2021-03-03
Supplement: Supplementary file [file aging-v13i6-202634-supplementary-material-SD1.pdf]

## SUPPLEMENTARY TABLES

**Supplementary Table 1. The clinical information about the 5 patients whose lung tissue samples with high metabolic activity and low metabolic activity were collected for RNA-sequencing.**

| Patients No. | Gender | Age (Year) | Clinical diagnosis                                                                            | History of tuberculosis treatment                                                                                                                                   | Preoperative sputum smear and culture | Nucleic acid PCR | Preoperative Xpert | Maximum SUV from PET/CT | Postoperative pus smear and culture | Postoperative pus Xpert | Detection of drug resistance genes                                                                      | Postoperative pathology                                                                                      |
|--------------|--------|------------|-----------------------------------------------------------------------------------------------|---------------------------------------------------------------------------------------------------------------------------------------------------------------------|---------------------------------------|------------------|--------------------|-------------------------|-------------------------------------|-------------------------|---------------------------------------------------------------------------------------------------------|--------------------------------------------------------------------------------------------------------------|
| 1            | Male   | 38         | Pulmonary tuberculosis                                                                        | The first treatment lasted for 6 months, and recurrence was observed one year after drug withdrawal, followed by treatments for more than 4 years                   | Negative                              | Negative         | Negative           | 6.19                    | Negative                            | Negative                | Negative                                                                                                | Epithelioid granuloma formation, negative by acid fast staining, and coagulative necrosis                    |
| 2            | Female | 33         | Pulmonary tuberculosis, and spinal tuberculosis                                               | The first treatment lasted for 12 months, and cervical lymphoid tuberculosis was found 2 months after drug withdrawal, followed by treatments for more than 2 years | Negative                              | Negative         | Negative           | 3.87                    | Negative                            | Negative                | Mycobacterium tuberculosis (first-line drug sensitive)                                                  | Epithelioid granuloma formation, negative by acid fast staining, and completely coagulative necrosis         |
| 3            | Female | 37         | Multi-drug resistant tuberculosis, and left side chest wall tuberculosis with sinus formation | More than 4 months of anti-tuberculosis treatment                                                                                                                   | Negative                              | Negative         | Negative           | 4.8                     | 1+                                  | Negative                | Rifampin and isoniazide resistance                                                                      | Granuloma formation, complete coagulative necrosis, and 7 positive bacteria were found by acid fast staining |
| 4            | Female | 28         | Secondary pulmonary tuberculosis with multi-drug resistance                                   | More than 20 months of anti-tuberculosis treatment                                                                                                                  | Negative                              | Negative         | Negative           | 3.84                    | Negative                            | Negative                | Rifampin (S531L), ethambutol (306M2), streptomycin (43M), and isoniazid (315M) resistance site mutation | Epithelioid granuloma formation, negative by acid fast staining, and completely coagulative necrosis         |
| 5            | Female | 20         | Pulmonary tuberculosis, and tuberculous pleurisy                                              | More than 4 months of anti-tuberculosis treatment                                                                                                                   | Negative                              | Negative         | Negative           | 10                      | Negative                            | Negative                | Mycobacterium tuberculosis (first-line drug sensitive)                                                  | Coagulative necrosis and 4 positive bacteria were found by acid fast staining                                |

PET/CT: Positron Emission Tomography/Computed Tomography; SUV: standard uptake value.

**Supplementary Table 2. The clinical information about the 11 patients whose lung tissue samples with high metabolic activity and low metabolic activity were collected for experimental validation.**

| Patients No. | Gender | Age (Year) | Clinical diagnosis                                                                            | History of tuberculosis treatment                                                                                                                                   | Preoperative sputum smear and culture | Nucleic acid PCR | Preoperative Xpert | Maximum SUV from PET/CT | Postoperative pus smear and culture | Postoperative pus Xpert | Detection of drug resistance genes                                                                      | Postoperative pathology                                                                                      |
|--------------|--------|------------|-----------------------------------------------------------------------------------------------|---------------------------------------------------------------------------------------------------------------------------------------------------------------------|---------------------------------------|------------------|--------------------|-------------------------|-------------------------------------|-------------------------|---------------------------------------------------------------------------------------------------------|--------------------------------------------------------------------------------------------------------------|
| 1            | Male   | 38         | Pulmonary tuberculosis                                                                        | The first treatment lasted for 6 months, and recurrence was observed one year after drug withdrawal, followed by treatments for more than 4 years                   | Negative                              | Negative         | Negative           | 6.19                    | Negative                            | Negative                | Negative                                                                                                | Epithelioid granuloma formation, negative by acid fast staining, and coagulative necrosis                    |
| 2            | Female | 33         | Pulmonary tuberculosis, and spinal tuberculosis                                               | The first treatment lasted for 12 months, and cervical lymphoid tuberculosis was found 2 months after drug withdrawal, followed by treatments for more than 2 years | Negative                              | Negative         | Negative           | 3.87                    | Negative                            | Negative                | Mycobacterium tuberculosis (first-line drug sensitive)                                                  | Epithelioid granuloma formation, negative by acid fast staining, and completely coagulative necrosis         |
| 3            | Female | 37         | Multi-drug resistant tuberculosis, and left side chest wall tuberculosis with sinus formation | More than 4 months of anti-tuberculosis treatment                                                                                                                   | Negative                              | Negative         | Negative           | 4.8                     | 1+                                  | Negative                | Rifampin and isoniazide resistance                                                                      | Granuloma formation, complete coagulative necrosis, and 7 positive bacteria were found by acid fast staining |
| 4            | Female | 28         | Secondary pulmonary tuberculosis with multi-drug resistance                                   | More than 20 months of anti-tuberculosis treatment                                                                                                                  | Negative                              | Negative         | Negative           | 3.84                    | Negative                            | Negative                | Rifampin (S531L), ethambutol (306M2), streptomycin (43M), and isoniazid (315M) resistance site mutation | Epithelioid granuloma formation, negative by acid fast staining, and completely coagulative necrosis         |
| 5            | Female | 20         | Pulmonary tuberculosis, and tuberculous pleurisy                                              | More than 4 months of anti-tuberculosis treatment                                                                                                                   | Negative                              | Negative         | Negative           | 10                      | Negative                            | Negative                | Mycobacterium tuberculosis (first-line drug sensitive)                                                  | Coagulative necrosis and 4 positive bacteria were found by acid fast staining                                |
| 6            | Male   | 39         | Obsolete pulmonary tuberculosis with Aspergillus infection                                    | More than 2 months of anti-tuberculosis treatment                                                                                                                   | Negative                              | Negative         | Negative           | 3.1                     | Negative                            | Negative                | Negative                                                                                                | Inflammatory cell infiltration, inflammatory necrosis, interstitial hemorrhage, a                            |

|    |      |    |                                                 |                                                                                                                               |          |          |          |     |                          |                      |                                                                       |                                                                                                                                                                                                                                                                                                                                                                                                                                                                                                                   |
|----|------|----|-------------------------------------------------|-------------------------------------------------------------------------------------------------------------------------------|----------|----------|----------|-----|--------------------------|----------------------|-----------------------------------------------------------------------|-------------------------------------------------------------------------------------------------------------------------------------------------------------------------------------------------------------------------------------------------------------------------------------------------------------------------------------------------------------------------------------------------------------------------------------------------------------------------------------------------------------------|
| 7  | Male | 28 | Secondary pulmonary tuberculosis                | More than 14 months of anti-tuberculosis treatment, thereafter more than 5 months of treatment for pulmonary cavity formation | Negative | Negative | Negative | 4.2 | Negative                 | Negative             | Negative                                                              | large number of fungal spores and hyphae, and negative by acid fast staining<br>Inflammatory cell infiltration in the upper left lung, epithelioid granuloma, coagulative necrosis, negative by acid fast staining, and negative by Periodic Acid-Schiff staining<br>Inflammatory cell infiltration in the upper right lung, epithelioid granuloma, complete coagulative necrosis, and positive by acid fast staining<br>Inflammatory cell infiltration, epithelioid granuloma, and complete coagulative necrosis |
| 8  | Male | 55 | Cavitary pulmonary tuberculosis                 | More than 3 months of anti-tuberculosis treatment                                                                             | 2+       | Negative | Negative | 3.6 | Positive, MPB64 negative | Negative             | M.intracellulare                                                      | Inflammatory cell infiltration, epithelioid granuloma, and complete coagulative necrosis                                                                                                                                                                                                                                                                                                                                                                                                                          |
| 9  | Male | 57 | Pulmonary tuberculosis, and spinal tuberculosis | More than 2 months of anti-tuberculosis treatment                                                                             | 1+       | Negative | Negative | 5.5 | Negative                 | Rifampicin sensitive | Mycobacterium tuberculosis(first-line and second-line drug sensitive) | Inflammatory cell infiltration in the upper left lung, epithelioid granuloma, complete coagulative necrosis, and calcification.<br>Inflammatory cell infiltration in the upper left lung, epithelioid granuloma, and complete coagulative necrosis                                                                                                                                                                                                                                                                |
| 10 | Male | 39 | Pulmonary tuberculosis                          | More than 36 months of anti-tuberculosis treatment, followed by pulmonary cavity formation                                    | Negative | Negative | Negative | 3.6 | Negative                 | Rifampicin sensitive | Negative                                                              | Inflammatory cell infiltration in the upper left lung, epithelioid granuloma, complete coagulative necrosis, and calcification.<br>Inflammatory cell infiltration in the upper left lung, epithelioid granuloma, and complete coagulative necrosis                                                                                                                                                                                                                                                                |
| 11 | Male | 47 | Pulmonary tuberculosis                          | More than 15 months of anti-tuberculosis treatment                                                                            | Negative | Negative | Negative | 11  | 1+                       | Rifampicin sensitive | Negative                                                              | Inflammatory cell infiltration in the upper left lung, epithelioid granuloma, and complete coagulative necrosis                                                                                                                                                                                                                                                                                                                                                                                                   |

**Supplementary Table 3. Primer sequences for quantitative real-time polymerase chain reaction (qRT-PCR) analysis.**

| Name                                        | Primer         | Sequence (5' -> 3')      | Length | Tm    | Location  | Amplicon Size |
|---------------------------------------------|----------------|--------------------------|--------|-------|-----------|---------------|
| CIQB (NM_000491)                            | Forward Primer | AGGTGAATCGGGGAGACTACAA   | 21     | 60.0  | 330-350   |               |
|                                             | Reverse Primer | CACTGCGGGGCTCATAATTG     | 20     | 61.2  | 472-453   | 143           |
| CD68 (NM_001251)                            | Forward Primer | CTTCTCTCATTCCCCTATGGACA  | 23     | 60.6  | 643-665   |               |
|                                             | Reverse Primer | GAAGGACACATTGTACTCCACC   | 22     | 60.3  | 747-726   | 105           |
| CCL5 (NM_002985)                            | Forward primer | TCCTCATTGCTACTGCCCTC     | 20     | 59.17 | 87-106    |               |
|                                             | Reverse primer | TCGGGTGACAAAGACGACTG     | 20     | 59.97 | 237-256   | 170           |
| CCL19 (NM_006274)                           | Forward Primer | TACATCGTGAGGAACCTTCCACT  | 22     | 60.5  | 121-142   |               |
|                                             | Reverse Primer | CTGGATGATGCGTTCTACCCA    | 21     | 61.6  | 252-232   | 132           |
| MMP7 (NM_002423)                            | Forward Primer | GAGTGAGCTACAGTGGGAACA    | 21     | 61.1  | 81-101    |               |
|                                             | Reverse Primer | CTATGACGCGGGAGTTTAACAT   | 22     | 60.2  | 238-217   | 158           |
| HLA-DMB (NM_002118)                         | Forward Primer | ACCTGTCTGTTGGATGATGCT    | 21     | 61.1  | 82-102    |               |
|                                             | Reverse Primer | CGCAAGGGGCCATCTTATTCT    | 21     | 62.2  | 193-173   | 112           |
| CYBB (NM_000397)                            | Forward Primer | ACCGGGTTTATGATATCCACCT   | 23     | 60.9  | 89-111    |               |
|                                             | Reverse Primer | GATTTCGACAGACTGGCAAGA    | 21     | 60.0  | 223-203   | 135           |
| MSTRG.93125.4 (IGHG3)                       | Forward primer | TGCAGGTGTAGGTCTTCGTG     | 20     | 59.68 | 45-64     |               |
|                                             | Reverse primer | GTGACGGTGTGCGTGGAACTC    | 20     | 60.94 | 167-186   | 142           |
| MSTRG.93124.1 (IGHG4)                       | Forward primer | CTGACCTGGTTCTTGGTCATCT   | 22     | 60.5  | 156-177   |               |
|                                             | Reverse primer | GAGTACAAGTGCAAGGTCTCCA   | 22     | 59.4  | 136-257   | 102           |
| ENST00000429730.1<br>(LINC01857(NR_135567)) | Forward primer | CCCAGCATCCCTACTCTTGC     | 20     | 59.6  | 125-144   |               |
|                                             | Reverse primer | CACAGCAGTAGTCAGAAAGAACAC | 24     | 58.4  | 249-272   | 149           |
| GAPDH                                       | Forward primer | ATCACTGCCACCCAGAAGAC     | 20     | 59.9  | 709-728   |               |
|                                             | Reverse primer | ATGAGGTCCACCACCCTGTT     | 20     | 60.6  | 1125-1234 | 525           |
