# Supplementary material for: Long non-coding RNAs ENST00000429730.1 and MSTRG.93125.4 are associated with metabolic activity in tuberculosis lesions of sputum-negative tuberculosis patients
Source: Aging (Albany NY). 2021 Mar 3;13(6):8228–47. doi: 10.18632/aging.202634 (PMC8034958; doi:10.18632/aging.202634)
Supplement: Supplementary Table 4 [file aging-13-202634-s002.xlsx]

## Sheet: Sheet1
Supplementary Table 4. Expression of LncRNAs and their target genes from tissues with high and low metabolic activity of the 5 patients.
lncRNA and target gene pairs					lncRNA expression																							lncRNA cis- and trans-target gene expression
lncRNA	gene_name	cis_distance/_trans_cor	cor	sty	PET001L	PET007L	PET009L	PET010L	PET011L	PET001H	PET007H	PET009H	PET010H	PET011H	L_mean	H_mean	log2FC	pvalue	qvalue	significant	regulate	transcript_type	transcript_name	gene_id	gene_type	gene_name_id	style	PET001L	PET007L	PET009L	PET010L	PET011L	PET001H	PET007H	PET009H	PET010H	PET011H	L_mean	H_mean	log2FC	pvalue	qvalue	significant	regulate	transcript_type	transcript_name	gene_id	gene_type	gene_name_ensembleid
MSTRG.85501.1	TAGLN	0.999984	0.999984	trans	0	0	0	0	0	0	43.9449	0	0	0	0	8.79	9.78	9.64e-11	4.75e-08	yes	up	NovelLncRNA	ENST00000635274.1	MSTRG.85501	-	AL139099.5	lncRNA	0.482336	0.321404	0.478603	0.336471	0.212504	0.689692	90.6664	0.630781	0.261555	0.250543	0.37	18.5	5.66	7.55e-21	7.26e-18	yes	up	protein_coding	TAGLN-206	ENSG00000149591.16_3	protein_coding	ENST00000530649.5
MSTRG.47638.1	RPS20	0.927465	0.999949	trans	0	0.035831	0	0	0	0	0	28.2091	0	0	0.01	5.64	9.62	5.14e-06	0.00133377	yes	up	NovelLncRNA	ENST00000616527.4	MSTRG.47638	-	MALAT1	lncRNA	0	0.232674	0	0.000894	0	0.212121	0.023144	35.7971	0.31146	0	0.05	7.27	7.28	6.82e-09	2.78e-06	yes	up	protein_coding	RPS20-212	ENSG00000008988.9_3	protein_coding	ENST00000618656.1
MSTRG.47638.1	RPS20	0.999949	0.999949	trans	0	0.035831	0	0	0	0	0	28.2091	0	0	0.01	5.64	9.62	5.14e-06	0.00133377	yes	up	NovelLncRNA	ENST00000616527.4	MSTRG.47638	-	MALAT1	lncRNA	0	0.232674	0	0.000894	0	0.212121	0.023144	35.7971	0.31146	0	0.05	7.27	7.28	6.82e-09	2.78e-06	yes	up	protein_coding	RPS20-212	ENSG00000008988.9_3	protein_coding	ENST00000618656.1
MSTRG.47638.1	CHIT1	0.999685	0.999685	trans	0	0.035831	0	0	0	0	0	28.2091	0	0	0.01	5.64	9.62	5.14e-06	0.00133377	yes	up	NovelLncRNA	ENST00000616527.4	MSTRG.47638	-	MALAT1	lncRNA	0	0	0.599788	0	0	0	0.494569	29.2367	0	0	0.12	5.95	5.63	1.11e-07	3.87e-05	yes	up	protein_coding	CHIT1-201	ENSG00000133063.15_3	protein_coding	ENST00000255427.7
MSTRG.47638.1	CHIT1	0.908412	0.999685	trans	0	0.035831	0	0	0	0	0	28.2091	0	0	0.01	5.64	9.62	5.14e-06	0.00133377	yes	up	NovelLncRNA	ENST00000616527.4	MSTRG.47638	-	MALAT1	lncRNA	0	0	0.599788	0	0	0	0.494569	29.2367	0	0	0.12	5.95	5.63	1.11e-07	3.87e-05	yes	up	protein_coding	CHIT1-201	ENSG00000133063.15_3	protein_coding	ENST00000255427.7
MSTRG.85501.1	CREB3L2	0.998779	0.998779	trans	0	0	0	0	0	0	43.9449	0	0	0	0	8.79	9.78	9.64e-11	4.75e-08	yes	up	NovelLncRNA	ENST00000635274.1	MSTRG.85501	-	AL139099.5	lncRNA	0.658279	0.973158	1.12619	1.76427	1.19974	1.99946	29.5811	0.7541	1.75362	1.28234	1.14	7.07	2.63	3.12e-05	0.00676701	yes	up	protein_coding	CREB3L2-201	ENSG00000182158.14_3	protein_coding	ENST00000330387.10
ENST00000499732.2	LITAF	0.998027	0.998027	trans	1.78534	1.21975	1.09341	0.284935	0.956033	117.242	0.001839	1.95945	0.523503	87.2442	1.07	41.39	5.28	7.89e-44	1.44e-40	yes	up	lincRNA	NEAT1-201	ENSG00000245532.7_3	lincRNA	NEAT1	lncRNA	0	0	0	0	0	21.5736	0	0	0	14.2318	0	7.16	9.49	4.91e-09	2.03e-06	yes	up	protein_coding	LITAF-201	ENSG00000189067.12_3	protein_coding	ENST00000339430.9
ENST00000499732.2	LITAF	0.973522	0.998027	trans	1.78534	1.21975	1.09341	0.284935	0.956033	117.242	0.001839	1.95945	0.523503	87.2442	1.07	41.39	5.28	7.89e-44	1.44e-40	yes	up	lincRNA	NEAT1-201	ENSG00000245532.7_3	lincRNA	NEAT1	lncRNA	0	0	0	0	0	21.5736	0	0	0	14.2318	0	7.16	9.49	4.91e-09	2.03e-06	yes	up	protein_coding	LITAF-201	ENSG00000189067.12_3	protein_coding	ENST00000339430.9
MSTRG.93125.6	MMP3	0.997264	0.997264	trans	5.75836	8.58739	22.211	2.83516	2.01382	1264.25	1166.7	16.4888	36.6577	10.0191	8.28	498.82	5.91	0	0	yes	up	NovelLncRNA	ENST00000390548.6	MSTRG.93125	-	IGHG1	lncRNA	0.030425	0.062981	0.039677	0.044174	0.083227	9.16596	7.57071	0.192628	0.015706	0.383435	0.05	3.47	6.06	4.72e-05	0.00969689	yes	up	protein_coding	MMP3-201	ENSG00000149968.11_3	protein_coding	ENST00000299855.9
MSTRG.177316.1	MMP1	0.996457	0.996457	trans	2.48247	1.14692	5.21863	0.168674	0.607192	153.655	345.888	4.37876	0.887586	76.1135	1.92	116.18	5.92	1.47e-122	7.89e-119	yes	up	NovelLncRNA	ENST00000390325.2	MSTRG.177316	-	IGLC3	lncRNA	0.06227	0.133342	0	0.293988	0.029663	96.9852	252.62	2.81702	1.03636	36.8914	0.1	78.07	9.55	4.75e-65	1.25e-61	yes	up	protein_coding	MMP1-201	ENSG00000196611.4_3	protein_coding	ENST00000315274.6
MSTRG.47638.1	RPS15A	0.996307	0.996307	trans	0	0.035831	0	0	0	0	0	28.2091	0	0	0.01	5.64	9.62	5.14e-06	0.00133377	yes	up	NovelLncRNA	ENST00000616527.4	MSTRG.47638	-	MALAT1	lncRNA	0.071588	0.243128	0.074478	0.558045	0.072004	2.87914	0.074497	32.0701	0.084454	0.385511	0.2	7.1	5.12	1.07e-08	4.26e-06	yes	up	protein_coding	RPS15A-205	ENSG00000134419.15_3	protein_coding	ENST00000565420.5
MSTRG.93125.6	PI3	0.995604	0.995604	trans	5.75836	8.58739	22.211	2.83516	2.01382	1264.25	1166.7	16.4888	36.6577	10.0191	8.28	498.82	5.91	0	0	yes	up	NovelLncRNA	ENST00000390548.6	MSTRG.93125	-	IGHG1	lncRNA	1.35623	2.1623	0	1.59793	0.652373	30.8574	32.3052	0.491897	0.842644	0.246936	1.15	12.95	3.49	1.87e-11	9.87e-09	yes	up	protein_coding	PI3-201	ENSG00000124102.4_3	protein_coding	ENST00000243924.3
MSTRG.177254.3	MMP1	0.994784	0.994784	trans	0	0.115079	0.130311	0	0.114651	6.95054	18.0096	0.337577	0.131657	0.82908	0.07	5.25	6.19	5.45e-07	0.000168047	yes	up	NovelLncRNA	ENST00000390297.3	MSTRG.177254	-	IGLV1-44	lncRNA	0.06227	0.133342	0	0.293988	0.029663	96.9852	252.62	2.81702	1.03636	36.8914	0.1	78.07	9.55	4.75e-65	1.25e-61	yes	up	protein_coding	MMP1-201	ENSG00000196611.4_3	protein_coding	ENST00000315274.6
MSTRG.93724.1	CXCL13	0.994577	0.994577	trans	0.023055	0.004473	0.006798	0.017749	0	3.27324	8.22979	0.350965	1.86885	1.34069	0.01	3.01	8.18	0.000306542	0.048384	yes	up	NovelLncRNA	ENST00000560830.1	MSTRG.93724	-	GREM1	lncRNA	0.044188	0.351025	1.10193	0.122308	0.800507	37.206	124.494	7.71081	26.6443	16.8483	0.48	42.58	6.46	4.72e-46	8.84e-43	yes	up	protein_coding	CXCL13-201	ENSG00000156234.7_3	protein_coding	ENST00000286758.4
MSTRG.93125.6	MMP12	0.994324	0.994324	trans	5.75836	8.58739	22.211	2.83516	2.01382	1264.25	1166.7	16.4888	36.6577	10.0191	8.28	498.82	5.91	0	0	yes	up	NovelLncRNA	ENST00000390548.6	MSTRG.93125	-	IGHG1	lncRNA	0.049349	0.03552	0.045879	0.015738	0.144312	106.687	90.0288	1.86293	0.337818	12.0678	0.06	42.2	9.5	3.38e-36	5.1e-33	yes	up	protein_coding	MMP12-201	ENSG00000262406.2_3	protein_coding	ENST00000571244.2
MSTRG.177316.1	TNFRSF6B	0.994289	0.994289	trans	2.48247	1.14692	5.21863	0.168674	0.607192	153.655	345.888	4.37876	0.887586	76.1135	1.92	116.18	5.92	1.47e-122	7.89e-119	yes	up	NovelLncRNA	ENST00000390325.2	MSTRG.177316	-	IGLC3	lncRNA	0.032764	0.268005	0.089006	0.085865	0.023155	6.27889	11.6362	0.047622	0	3.46201	0.1	4.28	5.42	7.27e-06	0.00182544	yes	up	protein_coding	TNFRSF6B-201	ENSG00000243509.4_3	protein_coding	ENST00000369996.1
ENST00000624935.3	COL1A2	0.992808	0.992808	trans	0	0	0	0	0	21.9043	0	0	0	1.54592	0	4.69	8.88	2.52e-06	0.000689538	yes	up	processed_transcript	AC244205.1-201	ENSG00000240040.6_4	processed_transcript	AC244205.1	lncRNA	0	15.0796	0	0	0	171.884	6.95725	0.460077	0.76003	1.36004	3.02	36.28	3.59	3.91e-30	5.1e-27	yes	up	protein_coding	COL1A2-213	ENSG00000164692.17_3	protein_coding	ENST00000620463.1
ENST00000429730.1	RASSF4	0.992751	0.992751	trans	0.009558	0.137477	1.30742	0.496152	0.659683	2.83388	1.97939	3.91676	1.80286	14.2103	0.52	4.95	3.24	6.58e-05	0.0128349	yes	up	lincRNA	LINC01857-201	ENSG00000224137.1_2	lincRNA	LINC01857	lncRNA	0.606848	0.511191	0.417158	1.36356	1.19944	5.15901	4.28644	7.08725	1.49081	25.9366	0.82	8.79	3.42	4.27e-08	1.58e-05	yes	up	protein_coding	RASSF4-201	ENSG00000107551.20_3	protein_coding	ENST00000340258.9
MSTRG.93125.4	PLA2G2D	0.992656	0.992656	trans	0	0	0.009938	0	0	11.3823	10.3405	24.2382	0	53.3567	0	19.86	13.29	2.44e-10	1.15e-07	yes	up	NovelLncRNA	ENST00000641136.1	MSTRG.93125	-	IGHG3	lncRNA	0.055666	0.16016	1.4543	0.221302	1.14631	7.86248	3.57437	15.9517	1.55005	31.7736	0.61	12.14	4.32	9.31e-13	5.46e-10	yes	up	protein_coding	PLA2G2D-201	ENSG00000117215.14_3	protein_coding	ENST00000375105.7
ENST00000429730.1	MMP7	0.992056	0.992056	trans	0.009558	0.137477	1.30742	0.496152	0.659683	2.83388	1.97939	3.91676	1.80286	14.2103	0.52	4.95	3.24	6.58e-05	0.0128349	yes	up	lincRNA	LINC01857-201	ENSG00000224137.1_2	lincRNA	LINC01857	lncRNA	0.505864	1.17822	1.0283	0.71534	4.23408	11.201	6.511	14.1573	7.91817	78.6645	1.53	23.69	3.95	5.76e-22	5.74e-19	yes	up	protein_coding	MMP7-201	ENSG00000137673.8_3	protein_coding	ENST00000260227.4
MSTRG.147387.3	FAM46C	0.991052	0.991052	trans	0.006522	0.136724	0.006813	0	0.275125	21.9365	41.9113	2.18333	2.7263	0.636082	0.09	13.88	7.35	1.33e-15	9.39e-13	yes	up	NovelLncRNA	ENST00000390252.2	MSTRG.147387	-	IGKV3-15	lncRNA	5.9277	5.77093	4.10154	3.45413	3.50349	27.5971	40.596	4.13327	6.04808	4.11561	4.55	16.5	1.86	1.82e-06	0.000514395	yes	up	protein_coding	FAM46C-201	ENSG00000183508.4_3	protein_coding	ENST00000369448.3
ENST00000624935.3	IGLL5	0.99373	0.990854	trans	0	0	0	0	0	21.9043	0	0	0	1.54592	0	4.69	8.88	2.52e-06	0.000689538	yes	up	processed_transcript	AC244205.1-201	ENSG00000240040.6_4	processed_transcript	AC244205.1	lncRNA	11.2637	0.37375	3.51567	6.42154	1.26595	389.374	50.6339	0.65956	0	16.749	4.57	91.48	4.32	1.42e-85	4.83e-82	yes	up	protein_coding	IGLL5-202	ENSG00000254709.7_3	protein_coding	ENST00000531372.1
ENST00000624935.3	IGLL5	0.990854	0.990854	trans	0	0	0	0	0	21.9043	0	0	0	1.54592	0	4.69	8.88	2.52e-06	0.000689538	yes	up	processed_transcript	AC244205.1-201	ENSG00000240040.6_4	processed_transcript	AC244205.1	lncRNA	11.2637	0.37375	3.51567	6.42154	1.26595	389.374	50.6339	0.65956	0	16.749	4.57	91.48	4.32	1.42e-85	4.83e-82	yes	up	protein_coding	IGLL5-202	ENSG00000254709.7_3	protein_coding	ENST00000531372.1
ENST00000624935.3	IGLL5	0.991598	0.990854	trans	0	0	0	0	0	21.9043	0	0	0	1.54592	0	4.69	8.88	2.52e-06	0.000689538	yes	up	processed_transcript	AC244205.1-201	ENSG00000240040.6_4	processed_transcript	AC244205.1	lncRNA	11.2637	0.37375	3.51567	6.42154	1.26595	389.374	50.6339	0.65956	0	16.749	4.57	91.48	4.32	1.42e-85	4.83e-82	yes	up	protein_coding	IGLL5-202	ENSG00000254709.7_3	protein_coding	ENST00000531372.1
MSTRG.177254.3	COL15A1	0.990127	0.990127	trans	0	0.115079	0.130311	0	0.114651	6.95054	18.0096	0.337577	0.131657	0.82908	0.07	5.25	6.19	5.45e-07	0.000168047	yes	up	NovelLncRNA	ENST00000390297.3	MSTRG.177254	-	IGLV1-44	lncRNA	6.67432	3.28837	3.8202	6.91843	2.01879	23.3759	49.2524	7.09563	6.33161	3.58227	4.54	17.93	1.98	1.33e-07	4.57e-05	yes	up	protein_coding	COL15A1-201	ENSG00000204291.10_3	protein_coding	ENST00000375001.7
MSTRG.147387.3	COL15A1	0.990078	0.990078	trans	0.006522	0.136724	0.006813	0	0.275125	21.9365	41.9113	2.18333	2.7263	0.636082	0.09	13.88	7.35	1.33e-15	9.39e-13	yes	up	NovelLncRNA	ENST00000390252.2	MSTRG.147387	-	IGKV3-15	lncRNA	6.67432	3.28837	3.8202	6.91843	2.01879	23.3759	49.2524	7.09563	6.33161	3.58227	4.54	17.93	1.98	1.33e-07	4.57e-05	yes	up	protein_coding	COL15A1-201	ENSG00000204291.10_3	protein_coding	ENST00000375001.7
ENST00000624935.3	GNB1	-0.90351	0.989433	trans	0	0	0	0	0	21.9043	0	0	0	1.54592	0	4.69	8.88	2.52e-06	0.000689538	yes	up	processed_transcript	AC244205.1-201	ENSG00000240040.6_4	processed_transcript	AC244205.1	lncRNA	0	2.69405	0.631897	3.91882	0	30.5322	2.44428	0.178283	0.42925	3.99376	1.45	7.52	2.37	6.93e-05	0.0134077	yes	up	protein_coding	GNB1-209	ENSG00000078369.17_3	protein_coding	ENST00000610897.4
ENST00000624935.3	GNB1	0.989433	0.989433	trans	0	0	0	0	0	21.9043	0	0	0	1.54592	0	4.69	8.88	2.52e-06	0.000689538	yes	up	processed_transcript	AC244205.1-201	ENSG00000240040.6_4	processed_transcript	AC244205.1	lncRNA	0	2.69405	0.631897	3.91882	0	30.5322	2.44428	0.178283	0.42925	3.99376	1.45	7.52	2.37	6.93e-05	0.0134077	yes	up	protein_coding	GNB1-209	ENSG00000078369.17_3	protein_coding	ENST00000610897.4
ENST00000429730.1	CXCL9	0.988711	0.988711	trans	0.009558	0.137477	1.30742	0.496152	0.659683	2.83388	1.97939	3.91676	1.80286	14.2103	0.52	4.95	3.24	6.58e-05	0.0128349	yes	up	lincRNA	LINC01857-201	ENSG00000224137.1_2	lincRNA	LINC01857	lncRNA	2.7027	7.27372	4.32362	5.0952	25.8521	55.4174	11.3106	75.069	19.8972	360.08	9.05	104.35	3.53	5.78e-82	1.91e-78	yes	up	protein_coding	CXCL9-201	ENSG00000138755.5_3	protein_coding	ENST00000264888.5
MSTRG.93124.1	CTSK	0.988569	0.988569	trans	0	0	0.049056	0	0.624409	37.3412	42.7296	22.7203	0.072424	295.269	0.13	79.63	9.21	3.81e-69	1.04e-65	yes	up	NovelLncRNA	ENST00000641978.1	MSTRG.93124	-	IGHG4	lncRNA	0.14005	0.127289	0.319544	1.99281	0.033167	0.762275	6.91983	4.7272	3.17994	109.226	0.52	24.96	5.58	1.71e-27	2.04e-24	yes	up	protein_coding	CTSK-201	ENSG00000143387.12_3	protein_coding	ENST00000271651.7
ENST00000429730.1	UBD	0.987562	0.987562	trans	0.009558	0.137477	1.30742	0.496152	0.659683	2.83388	1.97939	3.91676	1.80286	14.2103	0.52	4.95	3.24	6.58e-05	0.0128349	yes	up	lincRNA	LINC01857-201	ENSG00000224137.1_2	lincRNA	LINC01857	lncRNA	0.512831	2.08115	0.658074	0.910999	4.15746	11.0088	2.53945	16.3097	4.47414	90.1825	1.66	24.9	3.9	8.63e-23	8.83e-20	yes	up	protein_coding	UBD-203	ENSG00000213886.3_3	protein_coding	ENST00000377050.4
MSTRG.93124.1	MMP7	0.987463	0.987463	trans	0	0	0.049056	0	0.624409	37.3412	42.7296	22.7203	0.072424	295.269	0.13	79.63	9.21	3.81e-69	1.04e-65	yes	up	NovelLncRNA	ENST00000641978.1	MSTRG.93124	-	IGHG4	lncRNA	0.505864	1.17822	1.0283	0.71534	4.23408	11.201	6.511	14.1573	7.91817	78.6645	1.53	23.69	3.95	5.76e-22	5.74e-19	yes	up	protein_coding	MMP7-201	ENSG00000137673.8_3	protein_coding	ENST00000260227.4
MSTRG.85501.1	GAS1	0.986453	0.986453	trans	0	0	0	0	0	0	43.9449	0	0	0	0	8.79	9.78	9.64e-11	4.75e-08	yes	up	NovelLncRNA	ENST00000635274.1	MSTRG.85501	-	AL139099.5	lncRNA	0.207839	1.16795	2.90583	3.64424	0.555797	0.911021	33.2622	3.68746	4.72864	0.173667	1.7	8.55	2.33	2.83e-05	0.00620996	yes	up	protein_coding	GAS1-201	ENSG00000180447.6_3	protein_coding	ENST00000298743.8
MSTRG.85501.1	RCN3	0.985885	0.985885	trans	0	0	0	0	0	0	43.9449	0	0	0	0	8.79	9.78	9.64e-11	4.75e-08	yes	up	NovelLncRNA	ENST00000635274.1	MSTRG.85501	-	AL139099.5	lncRNA	0.886022	0.251838	1.0409	0.912418	0.157686	1.03569	18.3801	0.892366	3.55291	0.954226	0.65	4.96	2.93	0.000170743	0.029505	yes	up	protein_coding	RCN3-201	ENSG00000142552.7_3	protein_coding	ENST00000270645.7
ENST00000429730.1	CYBB	0.985387	0.985387	trans	0.009558	0.137477	1.30742	0.496152	0.659683	2.83388	1.97939	3.91676	1.80286	14.2103	0.52	4.95	3.24	6.58e-05	0.0128349	yes	up	lincRNA	LINC01857-201	ENSG00000224137.1_2	lincRNA	LINC01857	lncRNA	10.4091	21.3221	25.7575	11.7448	40.9207	40.0288	58.765	79.1161	37.4944	224.001	22.03	87.88	2	6.04e-32	8.23e-29	yes	up	protein_coding	CYBB-201	ENSG00000165168.7_3	protein_coding	ENST00000378588.4
MSTRG.93124.1	LTF	0.938369	0.985109	trans	0	0	0.049056	0	0.624409	37.3412	42.7296	22.7203	0.072424	295.269	0.13	79.63	9.21	3.81e-69	1.04e-65	yes	up	NovelLncRNA	ENST00000641978.1	MSTRG.93124	-	IGHG4	lncRNA	0.612659	1.07407	0.525222	0.016717	0.976306	31.0429	0.027419	1.9059	9.23053	212.768	0.64	50.99	6.31	6.67e-55	1.5e-51	yes	up	protein_coding	LTF-201	ENSG00000012223.12_3	protein_coding	ENST00000231751.8
MSTRG.93124.1	LTF	0.985109	0.985109	trans	0	0	0.049056	0	0.624409	37.3412	42.7296	22.7203	0.072424	295.269	0.13	79.63	9.21	3.81e-69	1.04e-65	yes	up	NovelLncRNA	ENST00000641978.1	MSTRG.93124	-	IGHG4	lncRNA	0.612659	1.07407	0.525222	0.016717	0.976306	31.0429	0.027419	1.9059	9.23053	212.768	0.64	50.99	6.31	6.67e-55	1.5e-51	yes	up	protein_coding	LTF-201	ENSG00000012223.12_3	protein_coding	ENST00000231751.8
MSTRG.85501.1	CCL3L1	0.984241	0.984241	trans	0	0	0	0	0	0	43.9449	0	0	0	0	8.79	9.78	9.64e-11	4.75e-08	yes	up	NovelLncRNA	ENST00000635274.1	MSTRG.85501	-	AL139099.5	lncRNA	0.179858	2.32699	0	0.189204	0.254588	4.43051	26.0972	0	0	0.589289	0.59	6.22	3.4	4.39e-06	0.00114807	yes	up	protein_coding	CCL3L1-001	ENSG00000205021.9	protein_coding	ENST00000422211.2
MSTRG.93125.4	HLA-DMB	0.984069	0.984069	trans	0	0	0.009938	0	0	11.3823	10.3405	24.2382	0	53.3567	0	19.86	13.29	2.44e-10	1.15e-07	yes	up	NovelLncRNA	ENST00000641136.1	MSTRG.93125	-	IGHG3	lncRNA	3.49556	12.0651	12.1041	5.14825	12.3864	23.0102	16.8634	40.5221	14.5198	75.2086	9.04	34.02	1.91	1.93e-12	1.1e-09	yes	up	protein_coding	HLA-DMB-258	ENSG00000242574.8_3	protein_coding	ENST00000418107.2
MSTRG.177316.1	PRDX4	0.983731	0.983731	trans	2.48247	1.14692	5.21863	0.168674	0.607192	153.655	345.888	4.37876	0.887586	76.1135	1.92	116.18	5.92	1.47e-122	7.89e-119	yes	up	NovelLncRNA	ENST00000390325.2	MSTRG.177316	-	IGLC3	lncRNA	3.4178	3.97619	4.44225	6.04796	4.47088	21.1935	35.053	6.04199	0.141177	11.7621	4.47	14.84	1.73	2.37e-05	0.00531679	yes	up	protein_coding	PRDX4-202	ENSG00000123131.12_3	protein_coding	ENST00000379341.8
MSTRG.93124.1	RASSF4	0.983614	0.983614	trans	0	0	0.049056	0	0.624409	37.3412	42.7296	22.7203	0.072424	295.269	0.13	79.63	9.21	3.81e-69	1.04e-65	yes	up	NovelLncRNA	ENST00000641978.1	MSTRG.93124	-	IGHG4	lncRNA	0.606848	0.511191	0.417158	1.36356	1.19944	5.15901	4.28644	7.08725	1.49081	25.9366	0.82	8.79	3.42	4.27e-08	1.58e-05	yes	up	protein_coding	RASSF4-201	ENSG00000107551.20_3	protein_coding	ENST00000340258.9
MSTRG.93124.1	UBD	0.983601	0.983601	trans	0	0	0.049056	0	0.624409	37.3412	42.7296	22.7203	0.072424	295.269	0.13	79.63	9.21	3.81e-69	1.04e-65	yes	up	NovelLncRNA	ENST00000641978.1	MSTRG.93124	-	IGHG4	lncRNA	0.512831	2.08115	0.658074	0.910999	4.15746	11.0088	2.53945	16.3097	4.47414	90.1825	1.66	24.9	3.9	8.63e-23	8.83e-20	yes	up	protein_coding	UBD-203	ENSG00000213886.3_3	protein_coding	ENST00000377050.4
ENST00000429730.1	LGI2	0.9836	0.9836	trans	0.009558	0.137477	1.30742	0.496152	0.659683	2.83388	1.97939	3.91676	1.80286	14.2103	0.52	4.95	3.24	6.58e-05	0.0128349	yes	up	lincRNA	LINC01857-201	ENSG00000224137.1_2	lincRNA	LINC01857	lncRNA	0.513195	0.270114	0.2211	0.215831	0.192465	1.54729	3.19058	3.2318	1.18305	13.1994	0.28	4.47	3.98	2.67e-05	0.00590048	yes	up	protein_coding	LGI2-201	ENSG00000153012.11_3	protein_coding	ENST00000382114.8
MSTRG.93124.1	LGI2	0.983586	0.983586	trans	0	0	0.049056	0	0.624409	37.3412	42.7296	22.7203	0.072424	295.269	0.13	79.63	9.21	3.81e-69	1.04e-65	yes	up	NovelLncRNA	ENST00000641978.1	MSTRG.93124	-	IGHG4	lncRNA	0.513195	0.270114	0.2211	0.215831	0.192465	1.54729	3.19058	3.2318	1.18305	13.1994	0.28	4.47	3.98	2.67e-05	0.00590048	yes	up	protein_coding	LGI2-201	ENSG00000153012.11_3	protein_coding	ENST00000382114.8
MSTRG.93125.6	CD79A	0.983057	0.983057	trans	5.75836	8.58739	22.211	2.83516	2.01382	1264.25	1166.7	16.4888	36.6577	10.0191	8.28	498.82	5.91	0	0	yes	up	NovelLncRNA	ENST00000390548.6	MSTRG.93125	-	IGHG1	lncRNA	0.832604	0.439489	2.0925	0.603207	0.53228	49.7734	34.778	2.7847	6.68505	3.31123	0.9	19.47	4.43	7.46e-20	6.84e-17	yes	up	protein_coding	CD79A-201	ENSG00000105369.9_3	protein_coding	ENST00000221972.7
MSTRG.93124.1	RPS2	0.982933	0.982933	trans	0	0	0.049056	0	0.624409	37.3412	42.7296	22.7203	0.072424	295.269	0.13	79.63	9.21	3.81e-69	1.04e-65	yes	up	NovelLncRNA	ENST00000641978.1	MSTRG.93124	-	IGHG4	lncRNA	0	0.001984	0.003501	0.002288	0.001475	0	0.020882	0.001654	0	46.3214	0	9.27	12.29	2.11e-06	0.000588662	yes	up	protein_coding	RPS2-201	ENSG00000140988.15_3	protein_coding	ENST00000343262.8
MSTRG.93124.1	RPS2	0.968902	0.982933	trans	0	0	0.049056	0	0.624409	37.3412	42.7296	22.7203	0.072424	295.269	0.13	79.63	9.21	3.81e-69	1.04e-65	yes	up	NovelLncRNA	ENST00000641978.1	MSTRG.93124	-	IGHG4	lncRNA	0	0.001984	0.003501	0.002288	0.001475	0	0.020882	0.001654	0	46.3214	0	9.27	12.29	2.11e-06	0.000588662	yes	up	protein_coding	RPS2-201	ENSG00000140988.15_3	protein_coding	ENST00000343262.8
ENST00000602711.1	FCER1G	0.982885	0.982885	trans	4.00317	4.84342	8.63375	2.49243	9.53212	18.1752	11.8053	24.306	7.31206	35.5636	5.9	19.43	1.72	1.54e-06	0.000439593	yes	up	sense_intronic	AC025857.2-201	ENSG00000269899.1_4	sense_intronic	AC025857.2	lncRNA	24.1599	20.8105	39.3476	11.3956	31.6745	68.1987	44.3957	67.2073	28.2886	111.426	25.48	63.9	1.33	4.6e-11	2.34e-08	yes	up	protein_coding	FCER1G-201	ENSG00000158869.10_3	protein_coding	ENST00000289902.1
ENST00000429730.1	CCL5	0.98269	0.98269	trans	0.009558	0.137477	1.30742	0.496152	0.659683	2.83388	1.97939	3.91676	1.80286	14.2103	0.52	4.95	3.24	6.58e-05	0.0128349	yes	up	lincRNA	LINC01857-201	ENSG00000224137.1_2	lincRNA	LINC01857	lncRNA	6.58829	7.82407	6.05471	9.90355	9.25835	24.7777	11.6086	19.6236	16.257	67.3021	7.93	27.91	1.82	1.23e-09	5.46e-07	yes	up	protein_coding	CCL5-201	ENSG00000271503.5_3	protein_coding	ENST00000603197.5
ENST00000624935.3	CD99	0.982674	0.982674	trans	0	0	0	0	0	21.9043	0	0	0	1.54592	0	4.69	8.88	2.52e-06	0.000689538	yes	up	processed_transcript	AC244205.1-201	ENSG00000240040.6_4	processed_transcript	AC244205.1	lncRNA	0.051435	0.291345	0.270812	1.3145	0.512287	17.7739	1.85766	1.54004	3.37141	2.17509	0.49	5.34	3.45	1.78e-05	0.00411909	yes	up	protein_coding	CD99-205	ENSG00000002586.18_3	protein_coding	ENST00000381192.8
MSTRG.93124.1	RPL23	0.982019	0.982019	trans	0	0	0.049056	0	0.624409	37.3412	42.7296	22.7203	0.072424	295.269	0.13	79.63	9.21	3.81e-69	1.04e-65	yes	up	NovelLncRNA	ENST00000641978.1	MSTRG.93124	-	IGHG4	lncRNA	0	0.001418	0.001197	0	0.000715	7e-06	0	0	2.69631	162.465	0	33.03	15.6	1.12e-10	5.46e-08	yes	up	protein_coding	RPL23-203	ENSG00000125691.12_3	protein_coding	ENST00000394332.5
ENST00000555688.1	SOX7	0.981895	0.981895	trans	8.38361	7.81955	3.70913	9.41734	5.15456	2.55299	3.05767	3.24749	4.463	1.78727	6.9	3.02	-1.19	0.000210106	0.035155	yes	down	lincRNA	LINC00641-202	ENSG00000258441.1_2	processed_transcript	LINC00641	lncRNA	20.9533	17.9122	3.26813	20.7617	8.23403	2.12986	2.44598	2.47911	10.0591	0.538878	14.23	3.53	-2.01	2.2e-12	1.26e-09	yes	down	protein_coding	SOX7-201	ENSG00000171056.7_3	protein_coding	ENST00000304501.1
MSTRG.85501.1	DCN	0.980781	0.980781	trans	0	0	0	0	0	0	43.9449	0	0	0	0	8.79	9.78	9.64e-11	4.75e-08	yes	up	NovelLncRNA	ENST00000635274.1	MSTRG.85501	-	AL139099.5	lncRNA	0.587838	0	0.170901	0.137264	0	0.53063	14.9551	0	0.143362	3.01157	0.18	3.73	4.38	7.05e-05	0.0136149	yes	up	protein_coding	DCN-215	ENSG00000011465.16_3	protein_coding	ENST00000550099.5
ENST00000624935.3	PABPC1	0.980522	0.980522	trans	0	0	0	0	0	21.9043	0	0	0	1.54592	0	4.69	8.88	2.52e-06	0.000689538	yes	up	processed_transcript	AC244205.1-201	ENSG00000240040.6_4	processed_transcript	AC244205.1	lncRNA	0.510437	0.520184	0.251292	0.682344	3.29451	21.7121	1.36844	0.305261	3.35931	4.51646	1.05	6.25	2.57	0.000116124	0.0211201	yes	up	protein_coding	PABPC1-219	ENSG00000070756.15_3	protein_coding	ENST00000522387.5
ENST00000456363.1	ITGA8	0.980395	0.980395	trans	17.8198	24.6725	35.0572	40.9557	32.1116	2.57261	1.99956	12.9551	28.5294	4.56757	30.12	10.12	-1.57	2.08e-19	1.84e-16	yes	down	antisense_RNA	AC093110.1-201	ENSG00000238018.2_3	antisense_RNA	AC093110.1	lncRNA	10.8376	12.0319	15.468	17.9704	13.8667	1.86277	2.46702	8.68152	13.859	1.63238	14.03	5.7	-1.3	2.89e-08	1.09e-05	yes	down	protein_coding	ITGA8-201	ENSG00000077943.7_3	protein_coding	ENST00000378076.3
MSTRG.93124.1	SERPING1	0.980294	0.980294	trans	0	0	0.049056	0	0.624409	37.3412	42.7296	22.7203	0.072424	295.269	0.13	79.63	9.21	3.81e-69	1.04e-65	yes	up	NovelLncRNA	ENST00000641978.1	MSTRG.93124	-	IGHG4	lncRNA	1.07986	0	0	0	0	0	0	0	0	26.7463	0.22	5.35	4.63	1.27e-06	0.000368608	yes	up	protein_coding	SERPING1-202	ENSG00000149131.15_3	protein_coding	ENST00000340687.10
ENST00000624935.3	CCL22	0.980051	0.980051	trans	0	0	0	0	0	21.9043	0	0	0	1.54592	0	4.69	8.88	2.52e-06	0.000689538	yes	up	processed_transcript	AC244205.1-201	ENSG00000240040.6_4	processed_transcript	AC244205.1	lncRNA	0.632417	1.10811	0.18362	0.426538	1.27459	18.9105	4.1936	1.91586	1.49185	2.43478	0.73	5.79	3	3.86e-05	0.00812215	yes	up	protein_coding	CCL22-201	ENSG00000102962.4_3	protein_coding	ENST00000219235.4
MSTRG.93124.1	CXCL9	0.979715	0.979715	trans	0	0	0.049056	0	0.624409	37.3412	42.7296	22.7203	0.072424	295.269	0.13	79.63	9.21	3.81e-69	1.04e-65	yes	up	NovelLncRNA	ENST00000641978.1	MSTRG.93124	-	IGHG4	lncRNA	2.7027	7.27372	4.32362	5.0952	25.8521	55.4174	11.3106	75.069	19.8972	360.08	9.05	104.35	3.53	5.78e-82	1.91e-78	yes	up	protein_coding	CXCL9-201	ENSG00000138755.5_3	protein_coding	ENST00000264888.5
MSTRG.147387.3	MMP1	0.979712	0.979712	trans	0.006522	0.136724	0.006813	0	0.275125	21.9365	41.9113	2.18333	2.7263	0.636082	0.09	13.88	7.35	1.33e-15	9.39e-13	yes	up	NovelLncRNA	ENST00000390252.2	MSTRG.147387	-	IGKV3-15	lncRNA	0.06227	0.133342	0	0.293988	0.029663	96.9852	252.62	2.81702	1.03636	36.8914	0.1	78.07	9.55	4.75e-65	1.25e-61	yes	up	protein_coding	MMP1-201	ENSG00000196611.4_3	protein_coding	ENST00000315274.6
MSTRG.93125.6	MZB1	0.979491	0.979491	trans	5.75836	8.58739	22.211	2.83516	2.01382	1264.25	1166.7	16.4888	36.6577	10.0191	8.28	498.82	5.91	0	0	yes	up	NovelLncRNA	ENST00000390548.6	MSTRG.93125	-	IGHG1	lncRNA	3.42634	3.12626	8.61241	2.32271	1.01369	75.9244	91.9763	8.30363	17.6211	8.44421	3.7	40.45	3.45	3.75e-32	5.18e-29	yes	up	protein_coding	MZB1-201	ENSG00000170476.15_3	protein_coding	ENST00000302125.8
ENST00000555688.1	THBD	0.979489	0.979489	trans	8.38361	7.81955	3.70913	9.41734	5.15456	2.55299	3.05767	3.24749	4.463	1.78727	6.9	3.02	-1.19	0.000210106	0.035155	yes	down	lincRNA	LINC00641-202	ENSG00000258441.1_2	processed_transcript	LINC00641	lncRNA	27.745	26.597	11.7086	30.5766	9.72249	5.8231	7.33213	7.65186	11.5326	3.24545	21.27	7.12	-1.58	3.28e-14	2.15e-11	yes	down	protein_coding	THBD-201	ENSG00000178726.6_3	protein_coding	ENST00000377103.2
MSTRG.93125.4	NCF1	0.979488	0.979488	trans	0	0	0.009938	0	0	11.3823	10.3405	24.2382	0	53.3567	0	19.86	13.29	2.44e-10	1.15e-07	yes	up	NovelLncRNA	ENST00000641136.1	MSTRG.93125	-	IGHG3	lncRNA	3.34378	9.50779	2.38114	4.23408	7.80864	16.0739	12.528	24.6538	5.66981	40.6231	5.46	19.91	1.87	1.37e-07	4.71e-05	yes	up	protein_coding	NCF1-201	ENSG00000158517.13_3	protein_coding	ENST00000289473.8
MSTRG.93124.1	LGALS2	0.979443	0.979443	trans	0	0	0.049056	0	0.624409	37.3412	42.7296	22.7203	0.072424	295.269	0.13	79.63	9.21	3.81e-69	1.04e-65	yes	up	NovelLncRNA	ENST00000641978.1	MSTRG.93124	-	IGHG4	lncRNA	0.1007	0.162428	0.102912	0.357007	0.496535	8.70106	0.261114	3.95227	0.582537	34.6787	0.24	9.64	5.3	2.03e-11	1.06e-08	yes	up	protein_coding	LGALS2-201	ENSG00000100079.6_3	protein_coding	ENST00000215886.5
MSTRG.93124.1	RPL21	0.978394	0.978394	trans	0	0	0.049056	0	0.624409	37.3412	42.7296	22.7203	0.072424	295.269	0.13	79.63	9.21	3.81e-69	1.04e-65	yes	up	NovelLncRNA	ENST00000641978.1	MSTRG.93124	-	IGHG4	lncRNA	0	0.664978	0.439041	0	0	1.99129	2.21839	2.20032	4.34721	23.8727	0.22	6.93	4.97	1.98e-08	7.65e-06	yes	up	protein_coding	RPL21-201	ENSG00000122026.10_3	protein_coding	ENST00000272274.8
MSTRG.93124.1	RPL21	0.964519	0.978394	trans	0	0	0.049056	0	0.624409	37.3412	42.7296	22.7203	0.072424	295.269	0.13	79.63	9.21	3.81e-69	1.04e-65	yes	up	NovelLncRNA	ENST00000641978.1	MSTRG.93124	-	IGHG4	lncRNA	0	0.664978	0.439041	0	0	1.99129	2.21839	2.20032	4.34721	23.8727	0.22	6.93	4.97	1.98e-08	7.65e-06	yes	up	protein_coding	RPL21-201	ENSG00000122026.10_3	protein_coding	ENST00000272274.8
MSTRG.93124.1	RPL21	0.967987	0.978394	trans	0	0	0.049056	0	0.624409	37.3412	42.7296	22.7203	0.072424	295.269	0.13	79.63	9.21	3.81e-69	1.04e-65	yes	up	NovelLncRNA	ENST00000641978.1	MSTRG.93124	-	IGHG4	lncRNA	0	0.664978	0.439041	0	0	1.99129	2.21839	2.20032	4.34721	23.8727	0.22	6.93	4.97	1.98e-08	7.65e-06	yes	up	protein_coding	RPL21-201	ENSG00000122026.10_3	protein_coding	ENST00000272274.8
MSTRG.93125.4	RASSF4	0.97826	0.97826	trans	0	0	0.009938	0	0	11.3823	10.3405	24.2382	0	53.3567	0	19.86	13.29	2.44e-10	1.15e-07	yes	up	NovelLncRNA	ENST00000641136.1	MSTRG.93125	-	IGHG3	lncRNA	0.606848	0.511191	0.417158	1.36356	1.19944	5.15901	4.28644	7.08725	1.49081	25.9366	0.82	8.79	3.42	4.27e-08	1.58e-05	yes	up	protein_coding	RASSF4-201	ENSG00000107551.20_3	protein_coding	ENST00000340258.9
MSTRG.85501.1	RPS7	0.977932	0.977932	trans	0	0	0	0	0	0	43.9449	0	0	0	0	8.79	9.78	9.64e-11	4.75e-08	yes	up	NovelLncRNA	ENST00000635274.1	MSTRG.85501	-	AL139099.5	lncRNA	4.62809	7.23443	7.54342	3.12793	7.03442	10.8741	90.7307	5.1906	9.87615	22.9813	5.91	27.93	2.24	2.5e-13	1.54e-10	yes	up	protein_coding	RPS7-201	ENSG00000171863.12_3	protein_coding	ENST00000304921.9
ENST00000429730.1	CCR5	0.977718	0.977718	trans	0.009558	0.137477	1.30742	0.496152	0.659683	2.83388	1.97939	3.91676	1.80286	14.2103	0.52	4.95	3.24	6.58e-05	0.0128349	yes	up	lincRNA	LINC01857-201	ENSG00000224137.1_2	lincRNA	LINC01857	lncRNA	0	0.028263	0.91306	0.541177	2.17223	4.1468	3.05796	2.74289	3.05029	14.1883	0.73	5.44	2.9	9.58e-05	0.0178297	yes	up	protein_coding	CCR5-201	ENSG00000160791.13_3	protein_coding	ENST00000292303.4
ENST00000555688.1	HSPB8	0.977712	0.977712	trans	8.38361	7.81955	3.70913	9.41734	5.15456	2.55299	3.05767	3.24749	4.463	1.78727	6.9	3.02	-1.19	0.000210106	0.035155	yes	down	lincRNA	LINC00641-202	ENSG00000258441.1_2	processed_transcript	LINC00641	lncRNA	20.4106	18.4223	5.95722	26.5947	9.67198	4.12223	3.01292	6.39088	6.83486	3.61862	16.21	4.8	-1.76	2.5e-12	1.42e-09	yes	down	protein_coding	HSPB8-201	ENSG00000152137.6_3	protein_coding	ENST00000281938.6
MSTRG.93124.1	MAN2B1	0.977477	0.977477	trans	0	0	0.049056	0	0.624409	37.3412	42.7296	22.7203	0.072424	295.269	0.13	79.63	9.21	3.81e-69	1.04e-65	yes	up	NovelLncRNA	ENST00000641978.1	MSTRG.93124	-	IGHG4	lncRNA	3.11497	6.4147	9.48967	7.45541	4.06649	7.44912	17.5711	10.5648	7.60916	49.036	6.11	18.45	1.59	1.44e-05	0.0034148	yes	up	protein_coding	MAN2B1-203	ENSG00000104774.12_3	protein_coding	ENST00000456935.6
ENST00000499732.2	EPHX1	0.977365	0.977365	trans	1.78534	1.21975	1.09341	0.284935	0.956033	117.242	0.001839	1.95945	0.523503	87.2442	1.07	41.39	5.28	7.89e-44	1.44e-40	yes	up	lincRNA	NEAT1-201	ENSG00000245532.7_3	lincRNA	NEAT1	lncRNA	0.053498	0.1612	0.1202	0.494013	0.064015	12.2701	0.069339	0.020604	1.01462	13.1381	0.18	5.3	4.89	9.88e-07	0.000292645	yes	up	protein_coding	EPHX1-201	ENSG00000143819.12_4	protein_coding	ENST00000272167.9
ENST00000429730.1	C15orf48	0.945931	0.976991	trans	0.009558	0.137477	1.30742	0.496152	0.659683	2.83388	1.97939	3.91676	1.80286	14.2103	0.52	4.95	3.24	6.58e-05	0.0128349	yes	up	lincRNA	LINC01857-201	ENSG00000224137.1_2	lincRNA	LINC01857	lncRNA	1.16322	0.35726	0	0	2.25014	12.3046	5.30991	8.78401	0.80871	37.5808	0.75	12.96	4.1	4.63e-13	2.77e-10	yes	up	protein_coding	C15orf48-202	ENSG00000166920.12_3	protein_coding	ENST00000396650.6
ENST00000429730.1	C15orf48	0.976991	0.976991	trans	0.009558	0.137477	1.30742	0.496152	0.659683	2.83388	1.97939	3.91676	1.80286	14.2103	0.52	4.95	3.24	6.58e-05	0.0128349	yes	up	lincRNA	LINC01857-201	ENSG00000224137.1_2	lincRNA	LINC01857	lncRNA	1.16322	0.35726	0	0	2.25014	12.3046	5.30991	8.78401	0.80871	37.5808	0.75	12.96	4.1	4.63e-13	2.77e-10	yes	up	protein_coding	C15orf48-202	ENSG00000166920.12_3	protein_coding	ENST00000396650.6
MSTRG.93724.1	MMP1	0.976725	0.976725	trans	0.023055	0.004473	0.006798	0.017749	0	3.27324	8.22979	0.350965	1.86885	1.34069	0.01	3.01	8.18	0.000306542	0.048384	yes	up	NovelLncRNA	ENST00000560830.1	MSTRG.93724	-	GREM1	lncRNA	0.06227	0.133342	0	0.293988	0.029663	96.9852	252.62	2.81702	1.03636	36.8914	0.1	78.07	9.55	4.75e-65	1.25e-61	yes	up	protein_coding	MMP1-201	ENSG00000196611.4_3	protein_coding	ENST00000315274.6
MSTRG.47638.1	METTL7A	0.976083	0.976083	trans	0	0.035831	0	0	0	0	0	28.2091	0	0	0.01	5.64	9.62	5.14e-06	0.00133377	yes	up	NovelLncRNA	ENST00000616527.4	MSTRG.47638	-	MALAT1	lncRNA	0.030273	0.090289	0.027091	0.784233	0.040448	4.17812	3.37637	22.6627	0.051903	0.21196	0.19	6.1	4.97	1.39e-07	4.75e-05	yes	up	protein_coding	METTL7A-203	ENSG00000185432.11_3	protein_coding	ENST00000548553.1
ENST00000446372.2	CAMK2N1	0.976017	0.976017	trans	2.34231	6.2857	6.12061	7.52794	5.40091	0.589612	0.588399	1.48897	3.68316	0.16996	5.54	1.3	-2.09	8.24e-06	0.00204015	yes	down	lincRNA	SFTA1P-203	ENSG00000225383.7_3	lincRNA	SFTA1P	lncRNA	8.2118	12.0809	13.5363	16.6323	10.6255	2.446	2.14875	4.97115	10.1331	2.1029	12.22	4.36	-1.49	2.6e-08	9.89e-06	yes	down	protein_coding	CAMK2N1-201	ENSG00000162545.5_3	protein_coding	ENST00000375078.3
MSTRG.93125.6	PIM2	0.975931	0.975931	trans	5.75836	8.58739	22.211	2.83516	2.01382	1264.25	1166.7	16.4888	36.6577	10.0191	8.28	498.82	5.91	0	0	yes	up	NovelLncRNA	ENST00000390548.6	MSTRG.93125	-	IGHG1	lncRNA	2.9175	6.50258	0	2.50122	2.12116	35.9958	44.7131	3.3825	0	4.85093	2.81	17.79	2.66	2.62e-11	1.36e-08	yes	up	protein_coding	PIM2-201	ENSG00000102096.9_3	protein_coding	ENST00000376509.4
ENST00000602711.1	CD68	0.97592	0.97592	trans	4.00317	4.84342	8.63375	2.49243	9.53212	18.1752	11.8053	24.306	7.31206	35.5636	5.9	19.43	1.72	1.54e-06	0.000439593	yes	up	sense_intronic	AC025857.2-201	ENSG00000269899.1_4	sense_intronic	AC025857.2	lncRNA	8.33559	9.56667	27.6745	10.6958	20.2622	48.3426	47.6761	60.5951	20.9305	98.7788	15.31	55.26	1.85	3.06e-18	2.56e-15	yes	up	protein_coding	CD68-201	ENSG00000129226.13_3	protein_coding	ENST00000250092.10
MSTRG.93124.1	CYP27B1	0.975915	0.975915	trans	0	0	0.049056	0	0.624409	37.3412	42.7296	22.7203	0.072424	295.269	0.13	79.63	9.21	3.81e-69	1.04e-65	yes	up	NovelLncRNA	ENST00000641978.1	MSTRG.93124	-	IGHG4	lncRNA	0	0	0	0	0	5.25906	1.81836	0.183281	0	16.2695	0	4.71	8.88	2.42e-06	0.000665587	yes	up	protein_coding	CYP27B1-201	ENSG00000111012.9_3	protein_coding	ENST00000228606.8
MSTRG.147376.2	METTL7A	0.975795	0.975795	trans	0.350853	0.094075	0.219168	0	0.051382	1.07069	4.34511	16.1663	1.8983	0.345139	0.14	4.77	5.06	2.96e-06	0.000799536	yes	up	NovelLncRNA	ENST00000390237.2	MSTRG.147376	-	IGKC	lncRNA	0.030273	0.090289	0.027091	0.784233	0.040448	4.17812	3.37637	22.6627	0.051903	0.21196	0.19	6.1	4.97	1.39e-07	4.75e-05	yes	up	protein_coding	METTL7A-203	ENSG00000185432.11_3	protein_coding	ENST00000548553.1
ENST00000429730.1	LGALS2	0.97547	0.97547	trans	0.009558	0.137477	1.30742	0.496152	0.659683	2.83388	1.97939	3.91676	1.80286	14.2103	0.52	4.95	3.24	6.58e-05	0.0128349	yes	up	lincRNA	LINC01857-201	ENSG00000224137.1_2	lincRNA	LINC01857	lncRNA	0.1007	0.162428	0.102912	0.357007	0.496535	8.70106	0.261114	3.95227	0.582537	34.6787	0.24	9.64	5.3	2.03e-11	1.06e-08	yes	up	protein_coding	LGALS2-201	ENSG00000100079.6_3	protein_coding	ENST00000215886.5
ENST00000602711.1	APOE	0.975105	0.975105	trans	4.00317	4.84342	8.63375	2.49243	9.53212	18.1752	11.8053	24.306	7.31206	35.5636	5.9	19.43	1.72	1.54e-06	0.000439593	yes	up	sense_intronic	AC025857.2-201	ENSG00000269899.1_4	sense_intronic	AC025857.2	lncRNA	14.4595	6.22073	45.0428	9.73728	36.1737	179.762	25.7061	212.276	21.9105	329.456	22.33	153.82	2.78	6.46e-91	2.33e-87	yes	up	protein_coding	APOE-201	ENSG00000130203.9_3	protein_coding	ENST00000252486.8
ENST00000602711.1	ANKRD22	0.974077	0.974077	trans	4.00317	4.84342	8.63375	2.49243	9.53212	18.1752	11.8053	24.306	7.31206	35.5636	5.9	19.43	1.72	1.54e-06	0.000439593	yes	up	sense_intronic	AC025857.2-201	ENSG00000269899.1_4	sense_intronic	AC025857.2	lncRNA	0.894932	0.803465	0.775398	0.364184	2.07474	6.6386	1.41873	8.26822	2.20546	15.1777	0.98	6.74	2.78	2.37e-05	0.00532021	yes	up	protein_coding	ANKRD22-201	ENSG00000152766.5_3	protein_coding	ENST00000371930.4
MSTRG.47638.1	TAGLN2	0.974006	0.974006	trans	0	0.035831	0	0	0	0	0	28.2091	0	0	0.01	5.64	9.62	5.14e-06	0.00133377	yes	up	NovelLncRNA	ENST00000616527.4	MSTRG.47638	-	MALAT1	lncRNA	0.172154	0.004026	0.057597	0.074616	0.008324	0.779728	0.989068	15.1469	0.061962	3.48351	0.06	4.09	6.01	9.83e-06	0.00240112	yes	up	protein_coding	TAGLN2-203	ENSG00000158710.14_3	protein_coding	ENST00000368097.8
ENST00000456363.1	CAMK2N1	0.973893	0.973893	trans	17.8198	24.6725	35.0572	40.9557	32.1116	2.57261	1.99956	12.9551	28.5294	4.56757	30.12	10.12	-1.57	2.08e-19	1.84e-16	yes	down	antisense_RNA	AC093110.1-201	ENSG00000238018.2_3	antisense_RNA	AC093110.1	lncRNA	8.2118	12.0809	13.5363	16.6323	10.6255	2.446	2.14875	4.97115	10.1331	2.1029	12.22	4.36	-1.49	2.6e-08	9.89e-06	yes	down	protein_coding	CAMK2N1-201	ENSG00000162545.5_3	protein_coding	ENST00000375078.3
ENST00000429730.1	RPL21	0.927746	0.973817	trans	0.009558	0.137477	1.30742	0.496152	0.659683	2.83388	1.97939	3.91676	1.80286	14.2103	0.52	4.95	3.24	6.58e-05	0.0128349	yes	up	lincRNA	LINC01857-201	ENSG00000224137.1_2	lincRNA	LINC01857	lncRNA	0	0.664978	0.439041	0	0	1.99129	2.21839	2.20032	4.34721	23.8727	0.22	6.93	4.97	1.98e-08	7.65e-06	yes	up	protein_coding	RPL21-201	ENSG00000122026.10_3	protein_coding	ENST00000272274.8
ENST00000429730.1	RPL21	0.934986	0.973817	trans	0.009558	0.137477	1.30742	0.496152	0.659683	2.83388	1.97939	3.91676	1.80286	14.2103	0.52	4.95	3.24	6.58e-05	0.0128349	yes	up	lincRNA	LINC01857-201	ENSG00000224137.1_2	lincRNA	LINC01857	lncRNA	0	0.664978	0.439041	0	0	1.99129	2.21839	2.20032	4.34721	23.8727	0.22	6.93	4.97	1.98e-08	7.65e-06	yes	up	protein_coding	RPL21-201	ENSG00000122026.10_3	protein_coding	ENST00000272274.8
ENST00000429730.1	RPL21	0.973817	0.973817	trans	0.009558	0.137477	1.30742	0.496152	0.659683	2.83388	1.97939	3.91676	1.80286	14.2103	0.52	4.95	3.24	6.58e-05	0.0128349	yes	up	lincRNA	LINC01857-201	ENSG00000224137.1_2	lincRNA	LINC01857	lncRNA	0	0.664978	0.439041	0	0	1.99129	2.21839	2.20032	4.34721	23.8727	0.22	6.93	4.97	1.98e-08	7.65e-06	yes	up	protein_coding	RPL21-201	ENSG00000122026.10_3	protein_coding	ENST00000272274.8
MSTRG.93125.4	PGD	0.97375	0.97375	trans	0	0	0.009938	0	0	11.3823	10.3405	24.2382	0	53.3567	0	19.86	13.29	2.44e-10	1.15e-07	yes	up	NovelLncRNA	ENST00000641136.1	MSTRG.93125	-	IGHG3	lncRNA	15.1007	25.2135	15.9297	14.841	21.4869	31.2637	35.9438	38.0989	19.325	82.7583	18.51	41.48	1.16	6.44e-06	0.00163513	yes	up	protein_coding	PGD-201	ENSG00000142657.20_3	protein_coding	ENST00000270776.12
ENST00000429730.1	GPNMB	0.972736	0.972736	trans	0.009558	0.137477	1.30742	0.496152	0.659683	2.83388	1.97939	3.91676	1.80286	14.2103	0.52	4.95	3.24	6.58e-05	0.0128349	yes	up	lincRNA	LINC01857-201	ENSG00000224137.1_2	lincRNA	LINC01857	lncRNA	1.17721	1.81711	14.0918	1.77587	4.93465	9.24218	17.3842	13.5882	6.38637	61.1759	4.76	21.56	2.18	3.27e-10	1.52e-07	yes	up	protein_coding	GPNMB-203	ENSG00000136235.15_3	protein_coding	ENST00000409458.3
MSTRG.93124.1	C15orf48	0.934374	0.972373	trans	0	0	0.049056	0	0.624409	37.3412	42.7296	22.7203	0.072424	295.269	0.13	79.63	9.21	3.81e-69	1.04e-65	yes	up	NovelLncRNA	ENST00000641978.1	MSTRG.93124	-	IGHG4	lncRNA	1.16322	0.35726	0	0	2.25014	12.3046	5.30991	8.78401	0.80871	37.5808	0.75	12.96	4.1	4.63e-13	2.77e-10	yes	up	protein_coding	C15orf48-202	ENSG00000166920.12_3	protein_coding	ENST00000396650.6
MSTRG.93124.1	C15orf48	0.972373	0.972373	trans	0	0	0.049056	0	0.624409	37.3412	42.7296	22.7203	0.072424	295.269	0.13	79.63	9.21	3.81e-69	1.04e-65	yes	up	NovelLncRNA	ENST00000641978.1	MSTRG.93124	-	IGHG4	lncRNA	1.16322	0.35726	0	0	2.25014	12.3046	5.30991	8.78401	0.80871	37.5808	0.75	12.96	4.1	4.63e-13	2.77e-10	yes	up	protein_coding	C15orf48-202	ENSG00000166920.12_3	protein_coding	ENST00000396650.6
MSTRG.177254.3	CCL3L1	0.971926	0.971926	trans	0	0.115079	0.130311	0	0.114651	6.95054	18.0096	0.337577	0.131657	0.82908	0.07	5.25	6.19	5.45e-07	0.000168047	yes	up	NovelLncRNA	ENST00000390297.3	MSTRG.177254	-	IGLV1-44	lncRNA	0.179858	2.32699	0	0.189204	0.254588	4.43051	26.0972	0	0	0.589289	0.59	6.22	3.4	4.39e-06	0.00114807	yes	up	protein_coding	CCL3L1-001	ENSG00000205021.9	protein_coding	ENST00000422211.2
MSTRG.93124.1	GPNMB	0.971442	0.971442	trans	0	0	0.049056	0	0.624409	37.3412	42.7296	22.7203	0.072424	295.269	0.13	79.63	9.21	3.81e-69	1.04e-65	yes	up	NovelLncRNA	ENST00000641978.1	MSTRG.93124	-	IGHG4	lncRNA	1.17721	1.81711	14.0918	1.77587	4.93465	9.24218	17.3842	13.5882	6.38637	61.1759	4.76	21.56	2.18	3.27e-10	1.52e-07	yes	up	protein_coding	GPNMB-203	ENSG00000136235.15_3	protein_coding	ENST00000409458.3
MSTRG.177254.3	CXCL13	0.970795	0.970795	trans	0	0.115079	0.130311	0	0.114651	6.95054	18.0096	0.337577	0.131657	0.82908	0.07	5.25	6.19	5.45e-07	0.000168047	yes	up	NovelLncRNA	ENST00000390297.3	MSTRG.177254	-	IGLV1-44	lncRNA	0.044188	0.351025	1.10193	0.122308	0.800507	37.206	124.494	7.71081	26.6443	16.8483	0.48	42.58	6.46	4.72e-46	8.84e-43	yes	up	protein_coding	CXCL13-201	ENSG00000156234.7_3	protein_coding	ENST00000286758.4
MSTRG.177254.3	FAM46C	0.970507	0.970507	trans	0	0.115079	0.130311	0	0.114651	6.95054	18.0096	0.337577	0.131657	0.82908	0.07	5.25	6.19	5.45e-07	0.000168047	yes	up	NovelLncRNA	ENST00000390297.3	MSTRG.177254	-	IGLV1-44	lncRNA	5.9277	5.77093	4.10154	3.45413	3.50349	27.5971	40.596	4.13327	6.04808	4.11561	4.55	16.5	1.86	1.82e-06	0.000514395	yes	up	protein_coding	FAM46C-201	ENSG00000183508.4_3	protein_coding	ENST00000369448.3
MSTRG.93125.4	SLC29A3	0.970205	0.970205	trans	0	0	0.009938	0	0	11.3823	10.3405	24.2382	0	53.3567	0	19.86	13.29	2.44e-10	1.15e-07	yes	up	NovelLncRNA	ENST00000641136.1	MSTRG.93125	-	IGHG3	lncRNA	0	0.695689	0	0.689615	1.43049	3.55	4.19386	6.17894	1.04088	9.9215	0.56	4.98	3.14	8.53e-05	0.0161497	yes	up	protein_coding	SLC29A3-201	ENSG00000198246.7_3	protein_coding	ENST00000373189.5
MSTRG.147387.3	MZB1	0.96958	0.96958	trans	0.006522	0.136724	0.006813	0	0.275125	21.9365	41.9113	2.18333	2.7263	0.636082	0.09	13.88	7.35	1.33e-15	9.39e-13	yes	up	NovelLncRNA	ENST00000390252.2	MSTRG.147387	-	IGKV3-15	lncRNA	3.42634	3.12626	8.61241	2.32271	1.01369	75.9244	91.9763	8.30363	17.6211	8.44421	3.7	40.45	3.45	3.75e-32	5.18e-29	yes	up	protein_coding	MZB1-201	ENSG00000170476.15_3	protein_coding	ENST00000302125.8
ENST00000620635.1	ADRB1	0.96944	0.96944	trans	9.31867	6.5365	3.05319	6.65603	2.68266	1.47872	1.98479	2.08795	2.49397	1.36736	5.65	1.88	-1.59	8.94e-05	0.0168151	yes	down	lincRNA	AC068870.2-201	ENSG00000277782.1_3	lincRNA	AC068870.2	lncRNA	10.3743	6.52475	2.5301	9.37039	0.05399	0.209117	0.007503	1.31144	1.63083	0.12714	5.77	0.66	-3.13	6.41e-08	2.31e-05	yes	down	protein_coding	ADRB1-201	ENSG00000043591.5_3	protein_coding	ENST00000369295.3
MSTRG.93124.1	CCR5	0.96908	0.96908	trans	0	0	0.049056	0	0.624409	37.3412	42.7296	22.7203	0.072424	295.269	0.13	79.63	9.21	3.81e-69	1.04e-65	yes	up	NovelLncRNA	ENST00000641978.1	MSTRG.93124	-	IGHG4	lncRNA	0	0.028263	0.91306	0.541177	2.17223	4.1468	3.05796	2.74289	3.05029	14.1883	0.73	5.44	2.9	9.58e-05	0.0178297	yes	up	protein_coding	CCR5-201	ENSG00000160791.13_3	protein_coding	ENST00000292303.4
ENST00000602711.1	PLA2G2D	0.969024	0.969024	trans	4.00317	4.84342	8.63375	2.49243	9.53212	18.1752	11.8053	24.306	7.31206	35.5636	5.9	19.43	1.72	1.54e-06	0.000439593	yes	up	sense_intronic	AC025857.2-201	ENSG00000269899.1_4	sense_intronic	AC025857.2	lncRNA	0.055666	0.16016	1.4543	0.221302	1.14631	7.86248	3.57437	15.9517	1.55005	31.7736	0.61	12.14	4.32	9.31e-13	5.46e-10	yes	up	protein_coding	PLA2G2D-201	ENSG00000117215.14_3	protein_coding	ENST00000375105.7
ENST00000429730.1	HLA-DMB	0.968684	0.968684	trans	0.009558	0.137477	1.30742	0.496152	0.659683	2.83388	1.97939	3.91676	1.80286	14.2103	0.52	4.95	3.24	6.58e-05	0.0128349	yes	up	lincRNA	LINC01857-201	ENSG00000224137.1_2	lincRNA	LINC01857	lncRNA	3.49556	12.0651	12.1041	5.14825	12.3864	23.0102	16.8634	40.5221	14.5198	75.2086	9.04	34.02	1.91	1.93e-12	1.1e-09	yes	up	protein_coding	HLA-DMB-258	ENSG00000242574.8_3	protein_coding	ENST00000418107.2
ENST00000602711.1	HLA-DMB	0.968534	0.968534	trans	4.00317	4.84342	8.63375	2.49243	9.53212	18.1752	11.8053	24.306	7.31206	35.5636	5.9	19.43	1.72	1.54e-06	0.000439593	yes	up	sense_intronic	AC025857.2-201	ENSG00000269899.1_4	sense_intronic	AC025857.2	lncRNA	3.49556	12.0651	12.1041	5.14825	12.3864	23.0102	16.8634	40.5221	14.5198	75.2086	9.04	34.02	1.91	1.93e-12	1.1e-09	yes	up	protein_coding	HLA-DMB-258	ENSG00000242574.8_3	protein_coding	ENST00000418107.2
ENST00000429730.1	HIST1H2AD	0.968532	0.968532	trans	0.009558	0.137477	1.30742	0.496152	0.659683	2.83388	1.97939	3.91676	1.80286	14.2103	0.52	4.95	3.24	6.58e-05	0.0128349	yes	up	lincRNA	LINC01857-201	ENSG00000224137.1_2	lincRNA	LINC01857	lncRNA	1.19154	2.26493	3.50138	5.74709	5.05651	13.3259	3.01672	10.7333	8.3815	33.5281	3.55	13.8	1.96	4.66e-06	0.00121616	yes	up	protein_coding	HIST1H2AD-201	ENSG00000196866.2_3	protein_coding	ENST00000341023.1
MSTRG.41926.9	C1orf115	0.968487	0.968487	trans	9.33504	11.1079	5.11575	9.84899	8.73034	2.91356	1.08113	3.44851	4.45224	0.488951	8.83	2.48	-1.83	1.28e-07	4.4e-05	yes	down	NovelLncRNA	ENST00000227756.4	MSTRG.41926	-	GALNT18	lncRNA	8.84377	12.8853	5.31444	11.4192	7.6076	2.91955	2.34162	3.49909	4.90575	1.93814	9.21	3.12	-1.56	6.91e-07	0.000209593	yes	down	protein_coding	C1orf115-201	ENSG00000162817.6_3	protein_coding	ENST00000294889.5
ENST00000429730.1	LAP3	0.96793	0.96793	trans	0.009558	0.137477	1.30742	0.496152	0.659683	2.83388	1.97939	3.91676	1.80286	14.2103	0.52	4.95	3.24	6.58e-05	0.0128349	yes	up	lincRNA	LINC01857-201	ENSG00000224137.1_2	lincRNA	LINC01857	lncRNA	14.9562	24.3308	11.1891	18.752	22.0425	25.863	29.2934	34.9577	21.0822	81.7003	18.25	38.58	1.08	8.23e-05	0.0156174	yes	up	protein_coding	LAP3-210	ENSG00000002549.12_3	protein_coding	ENST00000606142.5
MSTRG.101872.3	S100A9	0.967732	0.967732	trans	0.488915	79.1319	1.49197	0	0	0.000688	9.66925	7.11859	0	0	16.22	3.36	-2.27	1.89e-15	1.32e-12	yes	down	NovelLncRNA	ENST00000251595.10	MSTRG.101872	-	HBA2	lncRNA	31.911	176.228	6.31713	3.20526	16.2501	30.2002	48.8168	6.96999	5.50413	9.99582	46.78	20.3	-1.2	2.56e-22	2.58e-19	yes	down	protein_coding	S100A9-201	ENSG00000163220.10_3	protein_coding	ENST00000368738.3
ENST00000555688.1	CD93	0.967714	0.967714	trans	8.38361	7.81955	3.70913	9.41734	5.15456	2.55299	3.05767	3.24749	4.463	1.78727	6.9	3.02	-1.19	0.000210106	0.035155	yes	down	lincRNA	LINC00641-202	ENSG00000258441.1_2	processed_transcript	LINC00641	lncRNA	63.9643	48.2676	22.3711	76.1118	34.8852	25.7415	22.3668	17.1032	33.1496	7.15758	49.12	21.1	-1.22	1.24e-23	1.31e-20	yes	down	protein_coding	CD93-201	ENSG00000125810.9_3	protein_coding	ENST00000246006.4
MSTRG.93125.4	CYBB	0.967374	0.967374	trans	0	0	0.009938	0	0	11.3823	10.3405	24.2382	0	53.3567	0	19.86	13.29	2.44e-10	1.15e-07	yes	up	NovelLncRNA	ENST00000641136.1	MSTRG.93125	-	IGHG3	lncRNA	10.4091	21.3221	25.7575	11.7448	40.9207	40.0288	58.765	79.1161	37.4944	224.001	22.03	87.88	2	6.04e-32	8.23e-29	yes	up	protein_coding	CYBB-201	ENSG00000165168.7_3	protein_coding	ENST00000378588.4
MSTRG.93124.1	CYBB	0.966808	0.966808	trans	0	0	0.049056	0	0.624409	37.3412	42.7296	22.7203	0.072424	295.269	0.13	79.63	9.21	3.81e-69	1.04e-65	yes	up	NovelLncRNA	ENST00000641978.1	MSTRG.93124	-	IGHG4	lncRNA	10.4091	21.3221	25.7575	11.7448	40.9207	40.0288	58.765	79.1161	37.4944	224.001	22.03	87.88	2	6.04e-32	8.23e-29	yes	up	protein_coding	CYBB-201	ENSG00000165168.7_3	protein_coding	ENST00000378588.4
ENST00000429730.1	PLA2G2D	0.966591	0.966591	trans	0.009558	0.137477	1.30742	0.496152	0.659683	2.83388	1.97939	3.91676	1.80286	14.2103	0.52	4.95	3.24	6.58e-05	0.0128349	yes	up	lincRNA	LINC01857-201	ENSG00000224137.1_2	lincRNA	LINC01857	lncRNA	0.055666	0.16016	1.4543	0.221302	1.14631	7.86248	3.57437	15.9517	1.55005	31.7736	0.61	12.14	4.32	9.31e-13	5.46e-10	yes	up	protein_coding	PLA2G2D-201	ENSG00000117215.14_3	protein_coding	ENST00000375105.7
MSTRG.93124.1	CCL5	0.966567	0.966567	trans	0	0	0.049056	0	0.624409	37.3412	42.7296	22.7203	0.072424	295.269	0.13	79.63	9.21	3.81e-69	1.04e-65	yes	up	NovelLncRNA	ENST00000641978.1	MSTRG.93124	-	IGHG4	lncRNA	6.58829	7.82407	6.05471	9.90355	9.25835	24.7777	11.6086	19.6236	16.257	67.3021	7.93	27.91	1.82	1.23e-09	5.46e-07	yes	up	protein_coding	CCL5-201	ENSG00000271503.5_3	protein_coding	ENST00000603197.5
MSTRG.147387.3	CCL18	0.966546	0.966546	trans	0.006522	0.136724	0.006813	0	0.275125	21.9365	41.9113	2.18333	2.7263	0.636082	0.09	13.88	7.35	1.33e-15	9.39e-13	yes	up	NovelLncRNA	ENST00000390252.2	MSTRG.147387	-	IGKV3-15	lncRNA	6.955	1.81873	5.99608	2.19566	19.8413	126.671	176.414	50.0475	2.45198	10.2125	7.36	73.16	3.31	2.28e-54	5.09e-51	yes	up	protein_coding	CCL18-201	ENSG00000275385.1_3	protein_coding	ENST00000616054.1
MSTRG.93124.1	LAP3	0.966375	0.966375	trans	0	0	0.049056	0	0.624409	37.3412	42.7296	22.7203	0.072424	295.269	0.13	79.63	9.21	3.81e-69	1.04e-65	yes	up	NovelLncRNA	ENST00000641978.1	MSTRG.93124	-	IGHG4	lncRNA	14.9562	24.3308	11.1891	18.752	22.0425	25.863	29.2934	34.9577	21.0822	81.7003	18.25	38.58	1.08	8.23e-05	0.0156174	yes	up	protein_coding	LAP3-210	ENSG00000002549.12_3	protein_coding	ENST00000606142.5
MSTRG.101872.3	SLC6A14	0.966316	0.966316	trans	0.488915	79.1319	1.49197	0	0	0.000688	9.66925	7.11859	0	0	16.22	3.36	-2.27	1.89e-15	1.32e-12	yes	down	NovelLncRNA	ENST00000251595.10	MSTRG.101872	-	HBA2	lncRNA	1.35858	25.7239	0.391045	3.43267	4.16464	1.00152	1.01524	0.200526	0.763408	1.89295	7.01	0.97	-2.85	8.71e-09	3.5e-06	yes	down	protein_coding	SLC6A14-202	ENSG00000268104.2_3	protein_coding	ENST00000598581.2
MSTRG.147376.2	CHIT1	0.966225	0.966225	trans	0.350853	0.094075	0.219168	0	0.051382	1.07069	4.34511	16.1663	1.8983	0.345139	0.14	4.77	5.06	2.96e-06	0.000799536	yes	up	NovelLncRNA	ENST00000390237.2	MSTRG.147376	-	IGKC	lncRNA	0	0	0.599788	0	0	0	0.494569	29.2367	0	0	0.12	5.95	5.63	1.11e-07	3.87e-05	yes	up	protein_coding	CHIT1-201	ENSG00000133063.15_3	protein_coding	ENST00000255427.7
MSTRG.93125.6	CTSD	0.965919	0.965919	trans	5.75836	8.58739	22.211	2.83516	2.01382	1264.25	1166.7	16.4888	36.6577	10.0191	8.28	498.82	5.91	0	0	yes	up	NovelLncRNA	ENST00000390548.6	MSTRG.93125	-	IGHG1	lncRNA	0	2.40535	0	0	0	28.732	25.3286	0	0	9.12784	0.48	12.64	4.72	7.15e-14	4.59e-11	yes	up	protein_coding	CTSD-211	ENSG00000117984.13_3	protein_coding	ENST00000637387.1
MSTRG.93125.4	RPS26	0.965861	0.965861	trans	0	0	0.009938	0	0	11.3823	10.3405	24.2382	0	53.3567	0	19.86	13.29	2.44e-10	1.15e-07	yes	up	NovelLncRNA	ENST00000641136.1	MSTRG.93125	-	IGHG3	lncRNA	0	0	0	0	0	0	0.012753	10.0875	0	21.7285	0	6.37	9.32	3.52e-08	1.32e-05	yes	up	protein_coding	RPS26-201	ENSG00000197728.9_3	protein_coding	ENST00000356464.9
ENST00000429730.1	CTSK	0.965451	0.965451	trans	0.009558	0.137477	1.30742	0.496152	0.659683	2.83388	1.97939	3.91676	1.80286	14.2103	0.52	4.95	3.24	6.58e-05	0.0128349	yes	up	lincRNA	LINC01857-201	ENSG00000224137.1_2	lincRNA	LINC01857	lncRNA	0.14005	0.127289	0.319544	1.99281	0.033167	0.762275	6.91983	4.7272	3.17994	109.226	0.52	24.96	5.58	1.71e-27	2.04e-24	yes	up	protein_coding	CTSK-201	ENSG00000143387.12_3	protein_coding	ENST00000271651.7
MSTRG.147387.3	PIM2	0.965165	0.965165	trans	0.006522	0.136724	0.006813	0	0.275125	21.9365	41.9113	2.18333	2.7263	0.636082	0.09	13.88	7.35	1.33e-15	9.39e-13	yes	up	NovelLncRNA	ENST00000390252.2	MSTRG.147387	-	IGKV3-15	lncRNA	2.9175	6.50258	0	2.50122	2.12116	35.9958	44.7131	3.3825	0	4.85093	2.81	17.79	2.66	2.62e-11	1.36e-08	yes	up	protein_coding	PIM2-201	ENSG00000102096.9_3	protein_coding	ENST00000376509.4
MSTRG.93125.4	LGI2	0.965086	0.965086	trans	0	0	0.009938	0	0	11.3823	10.3405	24.2382	0	53.3567	0	19.86	13.29	2.44e-10	1.15e-07	yes	up	NovelLncRNA	ENST00000641136.1	MSTRG.93125	-	IGHG3	lncRNA	0.513195	0.270114	0.2211	0.215831	0.192465	1.54729	3.19058	3.2318	1.18305	13.1994	0.28	4.47	3.98	2.67e-05	0.00590048	yes	up	protein_coding	LGI2-201	ENSG00000153012.11_3	protein_coding	ENST00000382114.8
ENST00000555688.1	EPAS1	0.965076	0.965076	trans	8.38361	7.81955	3.70913	9.41734	5.15456	2.55299	3.05767	3.24749	4.463	1.78727	6.9	3.02	-1.19	0.000210106	0.035155	yes	down	lincRNA	LINC00641-202	ENSG00000258441.1_2	processed_transcript	LINC00641	lncRNA	333.184	297.145	168.033	386.861	271.043	72.7853	58.5127	103.031	147.795	26.2465	291.25	81.67	-1.83	2.22e-202	2.05e-198	yes	down	protein_coding	EPAS1-201	ENSG00000116016.13_3	protein_coding	ENST00000263734.4
MSTRG.101872.3	C4BPA	0.965031	0.965031	trans	0.488915	79.1319	1.49197	0	0	0.000688	9.66925	7.11859	0	0	16.22	3.36	-2.27	1.89e-15	1.32e-12	yes	down	NovelLncRNA	ENST00000251595.10	MSTRG.101872	-	HBA2	lncRNA	2.78009	31.0061	6.11339	4.93358	6.51772	3.3574	2.69449	2.75996	5.00902	3.14597	10.27	3.39	-1.6	1.13e-07	3.94e-05	yes	down	protein_coding	C4BPA-201	ENSG00000123838.10_3	protein_coding	ENST00000367070.7
ENST00000602711.1	TSPAN33	0.964941	0.964941	trans	4.00317	4.84342	8.63375	2.49243	9.53212	18.1752	11.8053	24.306	7.31206	35.5636	5.9	19.43	1.72	1.54e-06	0.000439593	yes	up	sense_intronic	AC025857.2-201	ENSG00000269899.1_4	sense_intronic	AC025857.2	lncRNA	0.92887	0.617296	0.804045	1.04723	1.10259	5.43017	3.73588	7.44161	1.92495	9.16463	0.9	5.54	2.62	0.000234243	0.0385368	yes	up	protein_coding	TSPAN33-201	ENSG00000158457.5_3	protein_coding	ENST00000486685.2
MSTRG.177316.1	COL15A1	0.964874	0.964874	trans	2.48247	1.14692	5.21863	0.168674	0.607192	153.655	345.888	4.37876	0.887586	76.1135	1.92	116.18	5.92	1.47e-122	7.89e-119	yes	up	NovelLncRNA	ENST00000390325.2	MSTRG.177316	-	IGLC3	lncRNA	6.67432	3.28837	3.8202	6.91843	2.01879	23.3759	49.2524	7.09563	6.33161	3.58227	4.54	17.93	1.98	1.33e-07	4.57e-05	yes	up	protein_coding	COL15A1-201	ENSG00000204291.10_3	protein_coding	ENST00000375001.7
ENST00000429730.1	LTF	0.96483	0.96483	trans	0.009558	0.137477	1.30742	0.496152	0.659683	2.83388	1.97939	3.91676	1.80286	14.2103	0.52	4.95	3.24	6.58e-05	0.0128349	yes	up	lincRNA	LINC01857-201	ENSG00000224137.1_2	lincRNA	LINC01857	lncRNA	0.612659	1.07407	0.525222	0.016717	0.976306	31.0429	0.027419	1.9059	9.23053	212.768	0.64	50.99	6.31	6.67e-55	1.5e-51	yes	up	protein_coding	LTF-201	ENSG00000012223.12_3	protein_coding	ENST00000231751.8
ENST00000429730.1	LTF	0.968796	0.96483	trans	0.009558	0.137477	1.30742	0.496152	0.659683	2.83388	1.97939	3.91676	1.80286	14.2103	0.52	4.95	3.24	6.58e-05	0.0128349	yes	up	lincRNA	LINC01857-201	ENSG00000224137.1_2	lincRNA	LINC01857	lncRNA	0.612659	1.07407	0.525222	0.016717	0.976306	31.0429	0.027419	1.9059	9.23053	212.768	0.64	50.99	6.31	6.67e-55	1.5e-51	yes	up	protein_coding	LTF-201	ENSG00000012223.12_3	protein_coding	ENST00000231751.8
MSTRG.177254.3	TNFRSF6B	0.964821	0.964821	trans	0	0.115079	0.130311	0	0.114651	6.95054	18.0096	0.337577	0.131657	0.82908	0.07	5.25	6.19	5.45e-07	0.000168047	yes	up	NovelLncRNA	ENST00000390297.3	MSTRG.177254	-	IGLV1-44	lncRNA	0.032764	0.268005	0.089006	0.085865	0.023155	6.27889	11.6362	0.047622	0	3.46201	0.1	4.28	5.42	7.27e-06	0.00182544	yes	up	protein_coding	TNFRSF6B-201	ENSG00000243509.4_3	protein_coding	ENST00000369996.1
MSTRG.93724.1	COL15A1	0.964705	0.964705	trans	0.023055	0.004473	0.006798	0.017749	0	3.27324	8.22979	0.350965	1.86885	1.34069	0.01	3.01	8.18	0.000306542	0.048384	yes	up	NovelLncRNA	ENST00000560830.1	MSTRG.93724	-	GREM1	lncRNA	6.67432	3.28837	3.8202	6.91843	2.01879	23.3759	49.2524	7.09563	6.33161	3.58227	4.54	17.93	1.98	1.33e-07	4.57e-05	yes	up	protein_coding	COL15A1-201	ENSG00000204291.10_3	protein_coding	ENST00000375001.7
ENST00000602711.1	NCF1	0.963982	0.963982	trans	4.00317	4.84342	8.63375	2.49243	9.53212	18.1752	11.8053	24.306	7.31206	35.5636	5.9	19.43	1.72	1.54e-06	0.000439593	yes	up	sense_intronic	AC025857.2-201	ENSG00000269899.1_4	sense_intronic	AC025857.2	lncRNA	3.34378	9.50779	2.38114	4.23408	7.80864	16.0739	12.528	24.6538	5.66981	40.6231	5.46	19.91	1.87	1.37e-07	4.71e-05	yes	up	protein_coding	NCF1-201	ENSG00000158517.13_3	protein_coding	ENST00000289473.8
MSTRG.93125.4	CTSS	0.963932	0.963932	trans	0	0	0.009938	0	0	11.3823	10.3405	24.2382	0	53.3567	0	19.86	13.29	2.44e-10	1.15e-07	yes	up	NovelLncRNA	ENST00000641136.1	MSTRG.93125	-	IGHG3	lncRNA	10.3711	22.5732	12.4709	12.0272	23.8391	34.0145	46.2665	60.7816	18.2568	90.7808	16.26	50.02	1.62	3.66e-13	2.21e-10	yes	up	protein_coding	CTSS-201	ENSG00000163131.10_3	protein_coding	ENST00000368985.7
MSTRG.147376.2	RPS20	0.963846	0.963846	trans	0.350853	0.094075	0.219168	0	0.051382	1.07069	4.34511	16.1663	1.8983	0.345139	0.14	4.77	5.06	2.96e-06	0.000799536	yes	up	NovelLncRNA	ENST00000390237.2	MSTRG.147376	-	IGKC	lncRNA	0	0.232674	0	0.000894	0	0.212121	0.023144	35.7971	0.31146	0	0.05	7.27	7.28	6.82e-09	2.78e-06	yes	up	protein_coding	RPS20-212	ENSG00000008988.9_3	protein_coding	ENST00000618656.1
MSTRG.147376.2	RPS20	0.924981	0.963846	trans	0.350853	0.094075	0.219168	0	0.051382	1.07069	4.34511	16.1663	1.8983	0.345139	0.14	4.77	5.06	2.96e-06	0.000799536	yes	up	NovelLncRNA	ENST00000390237.2	MSTRG.147376	-	IGKC	lncRNA	0	0.232674	0	0.000894	0	0.212121	0.023144	35.7971	0.31146	0	0.05	7.27	7.28	6.82e-09	2.78e-06	yes	up	protein_coding	RPS20-212	ENSG00000008988.9_3	protein_coding	ENST00000618656.1
ENST00000602711.1	FILIP1L	0.963751	0.963751	trans	4.00317	4.84342	8.63375	2.49243	9.53212	18.1752	11.8053	24.306	7.31206	35.5636	5.9	19.43	1.72	1.54e-06	0.000439593	yes	up	sense_intronic	AC025857.2-201	ENSG00000269899.1_4	sense_intronic	AC025857.2	lncRNA	0.658197	0.956146	4.40068	2.38471	1.30629	11.7422	2.67494	17.7343	2.01731	22.6444	1.94	11.36	2.55	2.43e-07	8.04e-05	yes	up	protein_coding	FILIP1L-203	ENSG00000168386.18_3	protein_coding	ENST00000383694.3
ENST00000555688.1	AKAP2	0.963155	0.963155	trans	8.38361	7.81955	3.70913	9.41734	5.15456	2.55299	3.05767	3.24749	4.463	1.78727	6.9	3.02	-1.19	0.000210106	0.035155	yes	down	lincRNA	LINC00641-202	ENSG00000258441.1_2	processed_transcript	LINC00641	lncRNA	32.7762	34.8763	14.8172	50.3766	24.9571	9.33842	8.78342	11.242	22.7714	9.73389	31.56	12.37	-1.35	1.96e-17	1.57e-14	yes	down	protein_coding	AKAP2-202	ENSG00000241978.9_3	protein_coding	ENST00000374525.5
MSTRG.93125.4	LAPTM5	0.962876	0.962876	trans	0	0	0.009938	0	0	11.3823	10.3405	24.2382	0	53.3567	0	19.86	13.29	2.44e-10	1.15e-07	yes	up	NovelLncRNA	ENST00000641136.1	MSTRG.93125	-	IGHG3	lncRNA	41.2177	34.6177	61.5081	43.3152	80.9484	127.591	108.723	120.68	56.8789	274.456	52.32	137.67	1.4	1.2e-24	1.29e-21	yes	up	protein_coding	LAPTM5-201	ENSG00000162511.7_3	protein_coding	ENST00000294507.3
MSTRG.93125.4	LAP3	0.962866	0.962866	trans	0	0	0.009938	0	0	11.3823	10.3405	24.2382	0	53.3567	0	19.86	13.29	2.44e-10	1.15e-07	yes	up	NovelLncRNA	ENST00000641136.1	MSTRG.93125	-	IGHG3	lncRNA	14.9562	24.3308	11.1891	18.752	22.0425	25.863	29.2934	34.9577	21.0822	81.7003	18.25	38.58	1.08	8.23e-05	0.0156174	yes	up	protein_coding	LAP3-210	ENSG00000002549.12_3	protein_coding	ENST00000606142.5
ENST00000429730.1	PGD	0.962636	0.962636	trans	0.009558	0.137477	1.30742	0.496152	0.659683	2.83388	1.97939	3.91676	1.80286	14.2103	0.52	4.95	3.24	6.58e-05	0.0128349	yes	up	lincRNA	LINC01857-201	ENSG00000224137.1_2	lincRNA	LINC01857	lncRNA	15.1007	25.2135	15.9297	14.841	21.4869	31.2637	35.9438	38.0989	19.325	82.7583	18.51	41.48	1.16	6.44e-06	0.00163513	yes	up	protein_coding	PGD-201	ENSG00000142657.20_3	protein_coding	ENST00000270776.12
MSTRG.93125.4	C15orf48	0.97818	0.962575	trans	0	0	0.009938	0	0	11.3823	10.3405	24.2382	0	53.3567	0	19.86	13.29	2.44e-10	1.15e-07	yes	up	NovelLncRNA	ENST00000641136.1	MSTRG.93125	-	IGHG3	lncRNA	1.16322	0.35726	0	0	2.25014	12.3046	5.30991	8.78401	0.80871	37.5808	0.75	12.96	4.1	4.63e-13	2.77e-10	yes	up	protein_coding	C15orf48-202	ENSG00000166920.12_3	protein_coding	ENST00000396650.6
MSTRG.93125.4	C15orf48	0.962575	0.962575	trans	0	0	0.009938	0	0	11.3823	10.3405	24.2382	0	53.3567	0	19.86	13.29	2.44e-10	1.15e-07	yes	up	NovelLncRNA	ENST00000641136.1	MSTRG.93125	-	IGHG3	lncRNA	1.16322	0.35726	0	0	2.25014	12.3046	5.30991	8.78401	0.80871	37.5808	0.75	12.96	4.1	4.63e-13	2.77e-10	yes	up	protein_coding	C15orf48-202	ENSG00000166920.12_3	protein_coding	ENST00000396650.6
MSTRG.41926.9	EPAS1	0.96241	0.96241	trans	9.33504	11.1079	5.11575	9.84899	8.73034	2.91356	1.08113	3.44851	4.45224	0.488951	8.83	2.48	-1.83	1.28e-07	4.4e-05	yes	down	NovelLncRNA	ENST00000227756.4	MSTRG.41926	-	GALNT18	lncRNA	333.184	297.145	168.033	386.861	271.043	72.7853	58.5127	103.031	147.795	26.2465	291.25	81.67	-1.83	2.22e-202	2.05e-198	yes	down	protein_coding	EPAS1-201	ENSG00000116016.13_3	protein_coding	ENST00000263734.4
ENST00000429730.1	LAPTM5	0.962398	0.962398	trans	0.009558	0.137477	1.30742	0.496152	0.659683	2.83388	1.97939	3.91676	1.80286	14.2103	0.52	4.95	3.24	6.58e-05	0.0128349	yes	up	lincRNA	LINC01857-201	ENSG00000224137.1_2	lincRNA	LINC01857	lncRNA	41.2177	34.6177	61.5081	43.3152	80.9484	127.591	108.723	120.68	56.8789	274.456	52.32	137.67	1.4	1.2e-24	1.29e-21	yes	up	protein_coding	LAPTM5-201	ENSG00000162511.7_3	protein_coding	ENST00000294507.3
MSTRG.93125.4	FERMT3	0.962346	0.962346	trans	0	0	0.009938	0	0	11.3823	10.3405	24.2382	0	53.3567	0	19.86	13.29	2.44e-10	1.15e-07	yes	up	NovelLncRNA	ENST00000641136.1	MSTRG.93125	-	IGHG3	lncRNA	0	0	0	0	0.934079	3.86112	3.73112	4.59751	0	8.9246	0.19	4.22	4.5	1.98e-05	0.00452289	yes	up	protein_coding	FERMT3-201	ENSG00000149781.12_3	protein_coding	ENST00000279227.9
ENST00000602711.1	C1QB	0.962286	0.962286	trans	4.00317	4.84342	8.63375	2.49243	9.53212	18.1752	11.8053	24.306	7.31206	35.5636	5.9	19.43	1.72	1.54e-06	0.000439593	yes	up	sense_intronic	AC025857.2-201	ENSG00000269899.1_4	sense_intronic	AC025857.2	lncRNA	35.7548	30.5568	100.817	2.2855	76.9454	96.8535	92.6493	231.984	57.7002	278.296	49.27	151.5	1.62	1.26e-36	1.93e-33	yes	up	protein_coding	C1QB-201	ENSG00000173369.15_3	protein_coding	ENST00000314933.6
MSTRG.93125.4	ANKRD22	0.961693	0.961693	trans	0	0	0.009938	0	0	11.3823	10.3405	24.2382	0	53.3567	0	19.86	13.29	2.44e-10	1.15e-07	yes	up	NovelLncRNA	ENST00000641136.1	MSTRG.93125	-	IGHG3	lncRNA	0.894932	0.803465	0.775398	0.364184	2.07474	6.6386	1.41873	8.26822	2.20546	15.1777	0.98	6.74	2.78	2.37e-05	0.00532021	yes	up	protein_coding	ANKRD22-201	ENSG00000152766.5_3	protein_coding	ENST00000371930.4
ENST00000499098.1	PREX2	0.961253	0.961253	trans	5.63234	7.51309	6.38303	9.98209	9.41123	1.83162	0.633777	3.68248	3.07844	1.3284	7.78	2.11	-1.88	4.99e-07	0.000154883	yes	down	antisense_RNA	AC096564.1-201	ENSG00000245293.2_4	antisense_RNA	AC096564.1	lncRNA	3.525	4.04617	2.13262	5.81384	4.87231	0.297605	0.524533	1.68731	1.78198	0	4.08	0.86	-2.25	7.32e-05	0.0140757	yes	down	protein_coding	PREX2-201	ENSG00000046889.18_3	protein_coding	ENST00000288368.4
ENST00000602711.1	FERMT3	0.961093	0.961093	trans	4.00317	4.84342	8.63375	2.49243	9.53212	18.1752	11.8053	24.306	7.31206	35.5636	5.9	19.43	1.72	1.54e-06	0.000439593	yes	up	sense_intronic	AC025857.2-201	ENSG00000269899.1_4	sense_intronic	AC025857.2	lncRNA	0	0	0	0	0.934079	3.86112	3.73112	4.59751	0	8.9246	0.19	4.22	4.5	1.98e-05	0.00452289	yes	up	protein_coding	FERMT3-201	ENSG00000149781.12_3	protein_coding	ENST00000279227.9
MSTRG.177254.3	PRDX4	0.960741	0.960741	trans	0	0.115079	0.130311	0	0.114651	6.95054	18.0096	0.337577	0.131657	0.82908	0.07	5.25	6.19	5.45e-07	0.000168047	yes	up	NovelLncRNA	ENST00000390297.3	MSTRG.177254	-	IGLV1-44	lncRNA	3.4178	3.97619	4.44225	6.04796	4.47088	21.1935	35.053	6.04199	0.141177	11.7621	4.47	14.84	1.73	2.37e-05	0.00531679	yes	up	protein_coding	PRDX4-202	ENSG00000123131.12_3	protein_coding	ENST00000379341.8
ENST00000602711.1	SLC29A3	0.960318	0.960318	trans	4.00317	4.84342	8.63375	2.49243	9.53212	18.1752	11.8053	24.306	7.31206	35.5636	5.9	19.43	1.72	1.54e-06	0.000439593	yes	up	sense_intronic	AC025857.2-201	ENSG00000269899.1_4	sense_intronic	AC025857.2	lncRNA	0	0.695689	0	0.689615	1.43049	3.55	4.19386	6.17894	1.04088	9.9215	0.56	4.98	3.14	8.53e-05	0.0161497	yes	up	protein_coding	SLC29A3-201	ENSG00000198246.7_3	protein_coding	ENST00000373189.5
MSTRG.177316.1	CXCL13	0.95971	0.95971	trans	2.48247	1.14692	5.21863	0.168674	0.607192	153.655	345.888	4.37876	0.887586	76.1135	1.92	116.18	5.92	1.47e-122	7.89e-119	yes	up	NovelLncRNA	ENST00000390325.2	MSTRG.177316	-	IGLC3	lncRNA	0.044188	0.351025	1.10193	0.122308	0.800507	37.206	124.494	7.71081	26.6443	16.8483	0.48	42.58	6.46	4.72e-46	8.84e-43	yes	up	protein_coding	CXCL13-201	ENSG00000156234.7_3	protein_coding	ENST00000286758.4
MSTRG.147387.3	TNFRSF6B	0.959502	0.959502	trans	0.006522	0.136724	0.006813	0	0.275125	21.9365	41.9113	2.18333	2.7263	0.636082	0.09	13.88	7.35	1.33e-15	9.39e-13	yes	up	NovelLncRNA	ENST00000390252.2	MSTRG.147387	-	IGKV3-15	lncRNA	0.032764	0.268005	0.089006	0.085865	0.023155	6.27889	11.6362	0.047622	0	3.46201	0.1	4.28	5.42	7.27e-06	0.00182544	yes	up	protein_coding	TNFRSF6B-201	ENSG00000243509.4_3	protein_coding	ENST00000369996.1
MSTRG.147376.2	RPS15A	0.959118	0.959118	trans	0.350853	0.094075	0.219168	0	0.051382	1.07069	4.34511	16.1663	1.8983	0.345139	0.14	4.77	5.06	2.96e-06	0.000799536	yes	up	NovelLncRNA	ENST00000390237.2	MSTRG.147376	-	IGKC	lncRNA	0.071588	0.243128	0.074478	0.558045	0.072004	2.87914	0.074497	32.0701	0.084454	0.385511	0.2	7.1	5.12	1.07e-08	4.26e-06	yes	up	protein_coding	RPS15A-205	ENSG00000134419.15_3	protein_coding	ENST00000565420.5
ENST00000602711.1	LILRB4	0.958674	0.958674	trans	4.00317	4.84342	8.63375	2.49243	9.53212	18.1752	11.8053	24.306	7.31206	35.5636	5.9	19.43	1.72	1.54e-06	0.000439593	yes	up	sense_intronic	AC025857.2-201	ENSG00000269899.1_4	sense_intronic	AC025857.2	lncRNA	0.357458	0.033063	0.336203	0.052788	0.742534	7.67852	4.95663	8.0352	0.778974	11.7634	0.3	6.64	4.45	9.67e-08	3.39e-05	yes	up	protein_coding	LILRB4-202	ENSG00000186818.12_3	protein_coding	ENST00000391733.7
ENST00000429730.1	MAN2B1	0.95849	0.95849	trans	0.009558	0.137477	1.30742	0.496152	0.659683	2.83388	1.97939	3.91676	1.80286	14.2103	0.52	4.95	3.24	6.58e-05	0.0128349	yes	up	lincRNA	LINC01857-201	ENSG00000224137.1_2	lincRNA	LINC01857	lncRNA	3.11497	6.4147	9.48967	7.45541	4.06649	7.44912	17.5711	10.5648	7.60916	49.036	6.11	18.45	1.59	1.44e-05	0.0034148	yes	up	protein_coding	MAN2B1-203	ENSG00000104774.12_3	protein_coding	ENST00000456935.6
MSTRG.246995.1	FILIP1L	0.958437	0.958437	trans	0	0	2.55594	0	3.99632	6.06922	0	12.5767	1.35093	13.5371	1.31	6.71	2.36	0.000188021	0.0319724	yes	up	NovelLncRNA	ENST00000418931.6	MSTRG.246995	-	HLA-DPB1	lncRNA	0.658197	0.956146	4.40068	2.38471	1.30629	11.7422	2.67494	17.7343	2.01731	22.6444	1.94	11.36	2.55	2.43e-07	8.04e-05	yes	up	protein_coding	FILIP1L-203	ENSG00000168386.18_3	protein_coding	ENST00000383694.3
MSTRG.93124.1	PGD	0.958034	0.958034	trans	0	0	0.049056	0	0.624409	37.3412	42.7296	22.7203	0.072424	295.269	0.13	79.63	9.21	3.81e-69	1.04e-65	yes	up	NovelLncRNA	ENST00000641978.1	MSTRG.93124	-	IGHG4	lncRNA	15.1007	25.2135	15.9297	14.841	21.4869	31.2637	35.9438	38.0989	19.325	82.7583	18.51	41.48	1.16	6.44e-06	0.00163513	yes	up	protein_coding	PGD-201	ENSG00000142657.20_3	protein_coding	ENST00000270776.12
MSTRG.177316.1	FAM46C	0.956824	0.956824	trans	2.48247	1.14692	5.21863	0.168674	0.607192	153.655	345.888	4.37876	0.887586	76.1135	1.92	116.18	5.92	1.47e-122	7.89e-119	yes	up	NovelLncRNA	ENST00000390325.2	MSTRG.177316	-	IGLC3	lncRNA	5.9277	5.77093	4.10154	3.45413	3.50349	27.5971	40.596	4.13327	6.04808	4.11561	4.55	16.5	1.86	1.82e-06	0.000514395	yes	up	protein_coding	FAM46C-201	ENSG00000183508.4_3	protein_coding	ENST00000369448.3
MSTRG.93125.6	FAM46C	0.956786	0.956786	trans	5.75836	8.58739	22.211	2.83516	2.01382	1264.25	1166.7	16.4888	36.6577	10.0191	8.28	498.82	5.91	0	0	yes	up	NovelLncRNA	ENST00000390548.6	MSTRG.93125	-	IGHG1	lncRNA	5.9277	5.77093	4.10154	3.45413	3.50349	27.5971	40.596	4.13327	6.04808	4.11561	4.55	16.5	1.86	1.82e-06	0.000514395	yes	up	protein_coding	FAM46C-201	ENSG00000183508.4_3	protein_coding	ENST00000369448.3
ENST00000555688.1	ITPKC	0.956782	0.956782	trans	8.38361	7.81955	3.70913	9.41734	5.15456	2.55299	3.05767	3.24749	4.463	1.78727	6.9	3.02	-1.19	0.000210106	0.035155	yes	down	lincRNA	LINC00641-202	ENSG00000258441.1_2	processed_transcript	LINC00641	lncRNA	22.15	16.0495	3.00664	23.5005	5.80399	4.35149	3.49682	3.26057	11.0629	1.38679	14.1	4.71	-1.58	6.33e-10	2.87e-07	yes	down	protein_coding	ITPKC-201	ENSG00000086544.2_3	protein_coding	ENST00000263370.2
ENST00000429730.1	RPL23	0.956406	0.956406	trans	0.009558	0.137477	1.30742	0.496152	0.659683	2.83388	1.97939	3.91676	1.80286	14.2103	0.52	4.95	3.24	6.58e-05	0.0128349	yes	up	lincRNA	LINC01857-201	ENSG00000224137.1_2	lincRNA	LINC01857	lncRNA	0	0.001418	0.001197	0	0.000715	7e-06	0	0	2.69631	162.465	0	33.03	15.6	1.12e-10	5.46e-08	yes	up	protein_coding	RPL23-203	ENSG00000125691.12_3	protein_coding	ENST00000394332.5
MSTRG.147387.3	CXCL13	0.956293	0.956293	trans	0.006522	0.136724	0.006813	0	0.275125	21.9365	41.9113	2.18333	2.7263	0.636082	0.09	13.88	7.35	1.33e-15	9.39e-13	yes	up	NovelLncRNA	ENST00000390252.2	MSTRG.147387	-	IGKV3-15	lncRNA	0.044188	0.351025	1.10193	0.122308	0.800507	37.206	124.494	7.71081	26.6443	16.8483	0.48	42.58	6.46	4.72e-46	8.84e-43	yes	up	protein_coding	CXCL13-201	ENSG00000156234.7_3	protein_coding	ENST00000286758.4
ENST00000429730.1	CCL19	0.956213	0.956213	trans	0.009558	0.137477	1.30742	0.496152	0.659683	2.83388	1.97939	3.91676	1.80286	14.2103	0.52	4.95	3.24	6.58e-05	0.0128349	yes	up	lincRNA	LINC01857-201	ENSG00000224137.1_2	lincRNA	LINC01857	lncRNA	2.99616	1.18888	4.85438	1.79938	5.56248	55.4859	9.2948	35.1102	17.5561	118.637	3.28	47.22	3.85	3.26e-41	5.57e-38	yes	up	protein_coding	CCL19-201	ENSG00000172724.11_3	protein_coding	ENST00000311925.6
ENST00000429730.1	RPS2	0.9184	0.956078	trans	0.009558	0.137477	1.30742	0.496152	0.659683	2.83388	1.97939	3.91676	1.80286	14.2103	0.52	4.95	3.24	6.58e-05	0.0128349	yes	up	lincRNA	LINC01857-201	ENSG00000224137.1_2	lincRNA	LINC01857	lncRNA	0	0.001984	0.003501	0.002288	0.001475	0	0.020882	0.001654	0	46.3214	0	9.27	12.29	2.11e-06	0.000588662	yes	up	protein_coding	RPS2-201	ENSG00000140988.15_3	protein_coding	ENST00000343262.8
ENST00000429730.1	RPS2	0.956078	0.956078	trans	0.009558	0.137477	1.30742	0.496152	0.659683	2.83388	1.97939	3.91676	1.80286	14.2103	0.52	4.95	3.24	6.58e-05	0.0128349	yes	up	lincRNA	LINC01857-201	ENSG00000224137.1_2	lincRNA	LINC01857	lncRNA	0	0.001984	0.003501	0.002288	0.001475	0	0.020882	0.001654	0	46.3214	0	9.27	12.29	2.11e-06	0.000588662	yes	up	protein_coding	RPS2-201	ENSG00000140988.15_3	protein_coding	ENST00000343262.8
ENST00000589379.1	PREX2	0.955915	0.955915	trans	3.64998	2.721	2.25397	4.61814	4.11195	0.77509	0.121553	1.69942	0.766779	0.139955	3.47	0.7	-2.31	0.000212687	0.0354741	yes	down	antisense_RNA	AC011511.5-201	ENSG00000267607.1_3	antisense_RNA	AC011511.5	lncRNA	3.525	4.04617	2.13262	5.81384	4.87231	0.297605	0.524533	1.68731	1.78198	0	4.08	0.86	-2.25	7.32e-05	0.0140757	yes	down	protein_coding	PREX2-201	ENSG00000046889.18_3	protein_coding	ENST00000288368.4
ENST00000446372.2	TSPAN13	0.955449	0.955449	trans	2.34231	6.2857	6.12061	7.52794	5.40091	0.589612	0.588399	1.48897	3.68316	0.16996	5.54	1.3	-2.09	8.24e-06	0.00204015	yes	down	lincRNA	SFTA1P-203	ENSG00000225383.7_3	lincRNA	SFTA1P	lncRNA	14.3192	35.3281	23.2397	41.8751	26.4128	5.01142	5.85114	7.02447	13.4394	5.40897	28.24	7.35	-1.94	2.38e-22	2.4e-19	yes	down	protein_coding	TSPAN13-201	ENSG00000106537.7_3	protein_coding	ENST00000262067.4
MSTRG.93125.6	NNMT	0.95491	0.95491	trans	5.75836	8.58739	22.211	2.83516	2.01382	1264.25	1166.7	16.4888	36.6577	10.0191	8.28	498.82	5.91	0	0	yes	up	NovelLncRNA	ENST00000390548.6	MSTRG.93125	-	IGHG1	lncRNA	1.07499	6.8687	0.128078	4.49649	0.198346	23.7702	21.43	0.395701	1.65925	6.71164	2.55	10.79	2.08	1.92e-05	0.00440563	yes	up	protein_coding	NNMT-201	ENSG00000166741.7_3	protein_coding	ENST00000299964.3
MSTRG.93125.4	CD68	0.90286	0.954812	trans	0	0	0.009938	0	0	11.3823	10.3405	24.2382	0	53.3567	0	19.86	13.29	2.44e-10	1.15e-07	yes	up	NovelLncRNA	ENST00000641136.1	MSTRG.93125	-	IGHG3	lncRNA	8.33559	9.56667	27.6745	10.6958	20.2622	48.3426	47.6761	60.5951	20.9305	98.7788	15.31	55.26	1.85	3.06e-18	2.56e-15	yes	up	protein_coding	CD68-201	ENSG00000129226.13_3	protein_coding	ENST00000250092.10
MSTRG.93125.4	CD68	0.954812	0.954812	trans	0	0	0.009938	0	0	11.3823	10.3405	24.2382	0	53.3567	0	19.86	13.29	2.44e-10	1.15e-07	yes	up	NovelLncRNA	ENST00000641136.1	MSTRG.93125	-	IGHG3	lncRNA	8.33559	9.56667	27.6745	10.6958	20.2622	48.3426	47.6761	60.5951	20.9305	98.7788	15.31	55.26	1.85	3.06e-18	2.56e-15	yes	up	protein_coding	CD68-201	ENSG00000129226.13_3	protein_coding	ENST00000250092.10
MSTRG.93125.4	CILP	0.9546	0.9546	trans	0	0	0.009938	0	0	11.3823	10.3405	24.2382	0	53.3567	0	19.86	13.29	2.44e-10	1.15e-07	yes	up	NovelLncRNA	ENST00000641136.1	MSTRG.93125	-	IGHG3	lncRNA	5.45998	0.474559	0.758401	0.393324	0.151221	0.724886	4.40928	14.2844	3.57911	30.3732	1.45	10.67	2.88	5.03e-08	1.84e-05	yes	up	protein_coding	CILP-201	ENSG00000138615.5_3	protein_coding	ENST00000261883.5
ENST00000589379.1	ANKS1A	0.954582	0.954582	trans	3.64998	2.721	2.25397	4.61814	4.11195	0.77509	0.121553	1.69942	0.766779	0.139955	3.47	0.7	-2.31	0.000212687	0.0354741	yes	down	antisense_RNA	AC011511.5-201	ENSG00000267607.1_3	antisense_RNA	AC011511.5	lncRNA	5.94562	5.08373	5.02697	8.07691	7.92472	1.86915	1.94669	3.14377	1.36198	2.83237	6.41	2.23	-1.52	4.4e-05	0.00908251	yes	down	protein_coding	ANKS1A-201	ENSG00000064999.13_3	protein_coding	ENST00000360359.4
MSTRG.147387.3	PRDX4	0.954569	0.954569	trans	0.006522	0.136724	0.006813	0	0.275125	21.9365	41.9113	2.18333	2.7263	0.636082	0.09	13.88	7.35	1.33e-15	9.39e-13	yes	up	NovelLncRNA	ENST00000390252.2	MSTRG.147387	-	IGKV3-15	lncRNA	3.4178	3.97619	4.44225	6.04796	4.47088	21.1935	35.053	6.04199	0.141177	11.7621	4.47	14.84	1.73	2.37e-05	0.00531679	yes	up	protein_coding	PRDX4-202	ENSG00000123131.12_3	protein_coding	ENST00000379341.8
MSTRG.93724.1	TNFRSF6B	0.954412	0.954412	trans	0.023055	0.004473	0.006798	0.017749	0	3.27324	8.22979	0.350965	1.86885	1.34069	0.01	3.01	8.18	0.000306542	0.048384	yes	up	NovelLncRNA	ENST00000560830.1	MSTRG.93724	-	GREM1	lncRNA	0.032764	0.268005	0.089006	0.085865	0.023155	6.27889	11.6362	0.047622	0	3.46201	0.1	4.28	5.42	7.27e-06	0.00182544	yes	up	protein_coding	TNFRSF6B-201	ENSG00000243509.4_3	protein_coding	ENST00000369996.1
MSTRG.41926.9	TSPAN7	0.954131	0.954131	trans	9.33504	11.1079	5.11575	9.84899	8.73034	2.91356	1.08113	3.44851	4.45224	0.488951	8.83	2.48	-1.83	1.28e-07	4.4e-05	yes	down	NovelLncRNA	ENST00000227756.4	MSTRG.41926	-	GALNT18	lncRNA	15.3273	15.4958	8.64061	15.0882	10.7582	4.25731	2.07886	6.08662	10.9674	1.43242	13.06	4.96	-1.4	2.64e-08	1e-05	yes	down	protein_coding	TSPAN7-202	ENSG00000156298.12_3	protein_coding	ENST00000378482.6
MSTRG.93124.1	FTH1	0.953993	0.953993	trans	0	0	0.049056	0	0.624409	37.3412	42.7296	22.7203	0.072424	295.269	0.13	79.63	9.21	3.81e-69	1.04e-65	yes	up	NovelLncRNA	ENST00000641978.1	MSTRG.93124	-	IGHG4	lncRNA	203.181	274.248	330.514	173.585	67.8501	376.328	600.047	462.468	321.571	1343.83	209.88	620.85	1.56	1.54e-134	9.44e-131	yes	up	protein_coding	FTH1-201	ENSG00000167996.15_3	protein_coding	ENST00000273550.11
MSTRG.213352.17	SEMA3G	0.953947	0.953947	trans	2.89851	6.95165	0.56411	4.71523	3.84999	0.482734	0.798633	0.95244	1.87166	0.613678	3.8	0.94	-2.01	0.000289578	0.0460805	yes	down	NovelLncRNA	ENST00000394684.8	MSTRG.213352	-	SGMS2	lncRNA	3.46392	6.69564	0.017198	5.96178	2.93601	0.035547	0.510363	0.598322	0	0.022286	3.81	0.23	-4.03	2.33e-06	0.000644516	yes	down	protein_coding	SEMA3G-201	ENSG00000010319.6_3	protein_coding	ENST00000231721.6
ENST00000555688.1	HBEGF	0.953704	0.953704	trans	8.38361	7.81955	3.70913	9.41734	5.15456	2.55299	3.05767	3.24749	4.463	1.78727	6.9	3.02	-1.19	0.000210106	0.035155	yes	down	lincRNA	LINC00641-202	ENSG00000258441.1_2	processed_transcript	LINC00641	lncRNA	20.7487	23.4945	12.7501	28.2114	17.4564	8.53593	4.74398	7.34204	9.72692	5.42634	20.53	7.16	-1.52	2.76e-13	1.69e-10	yes	down	protein_coding	HBEGF-201	ENSG00000113070.7_3	protein_coding	ENST00000230990.6
ENST00000589379.1	TMEM204	0.953569	0.953569	trans	3.64998	2.721	2.25397	4.61814	4.11195	0.77509	0.121553	1.69942	0.766779	0.139955	3.47	0.7	-2.31	0.000212687	0.0354741	yes	down	antisense_RNA	AC011511.5-201	ENSG00000267607.1_3	antisense_RNA	AC011511.5	lncRNA	8.96205	5.93891	5.11813	8.96013	7.79937	3.7566	2.761	3.06677	3.553	1.67537	7.36	2.96	-1.31	5.41e-05	0.0108875	yes	down	protein_coding	TMEM204-202	ENSG00000131634.13_3	protein_coding	ENST00000566264.1
MSTRG.41926.9	HBEGF	0.953449	0.953449	trans	9.33504	11.1079	5.11575	9.84899	8.73034	2.91356	1.08113	3.44851	4.45224	0.488951	8.83	2.48	-1.83	1.28e-07	4.4e-05	yes	down	NovelLncRNA	ENST00000227756.4	MSTRG.41926	-	GALNT18	lncRNA	20.7487	23.4945	12.7501	28.2114	17.4564	8.53593	4.74398	7.34204	9.72692	5.42634	20.53	7.16	-1.52	2.76e-13	1.69e-10	yes	down	protein_coding	HBEGF-201	ENSG00000113070.7_3	protein_coding	ENST00000230990.6
ENST00000602711.1	LAPTM5	0.953029	0.953029	trans	4.00317	4.84342	8.63375	2.49243	9.53212	18.1752	11.8053	24.306	7.31206	35.5636	5.9	19.43	1.72	1.54e-06	0.000439593	yes	up	sense_intronic	AC025857.2-201	ENSG00000269899.1_4	sense_intronic	AC025857.2	lncRNA	41.2177	34.6177	61.5081	43.3152	80.9484	127.591	108.723	120.68	56.8789	274.456	52.32	137.67	1.4	1.2e-24	1.29e-21	yes	up	protein_coding	LAPTM5-201	ENSG00000162511.7_3	protein_coding	ENST00000294507.3
ENST00000563635.5	CEACAM6	0.952885	0.952885	trans	10.9089	23.6852	23.369	24.6353	21.4244	4.04301	1.77789	11.762	7.08141	3.94093	20.8	5.72	-1.86	3e-16	2.19e-13	yes	down	processed_transcript	AL137782.1-201	ENSG00000261553.5_4	processed_transcript	AL137782.1	lncRNA	17.3145	25.1603	24.3799	25.1708	16.3454	4.61891	0.311337	10.8037	5.4028	1.82736	21.67	4.59	-2.24	7.26e-20	6.67e-17	yes	down	protein_coding	CEACAM6-201	ENSG00000086548.8_3	protein_coding	ENST00000199764.6
ENST00000429730.1	FTH1	0.952751	0.952751	trans	0.009558	0.137477	1.30742	0.496152	0.659683	2.83388	1.97939	3.91676	1.80286	14.2103	0.52	4.95	3.24	6.58e-05	0.0128349	yes	up	lincRNA	LINC01857-201	ENSG00000224137.1_2	lincRNA	LINC01857	lncRNA	203.181	274.248	330.514	173.585	67.8501	376.328	600.047	462.468	321.571	1343.83	209.88	620.85	1.56	1.54e-134	9.44e-131	yes	up	protein_coding	FTH1-201	ENSG00000167996.15_3	protein_coding	ENST00000273550.11
MSTRG.93724.1	CEMIP	0.951952	0.951952	trans	0.023055	0.004473	0.006798	0.017749	0	3.27324	8.22979	0.350965	1.86885	1.34069	0.01	3.01	8.18	0.000306542	0.048384	yes	up	NovelLncRNA	ENST00000560830.1	MSTRG.93724	-	GREM1	lncRNA	0.429362	0	0.812594	1.10627	0.766889	5.53863	10.84	1.61211	5.82358	4.29937	0.62	5.62	3.17	2.67e-05	0.00590048	yes	up	protein_coding	CEMIP-201	ENSG00000103888.16_3	protein_coding	ENST00000220244.7
MSTRG.246995.1	APOE	0.951689	0.951689	trans	0	0	2.55594	0	3.99632	6.06922	0	12.5767	1.35093	13.5371	1.31	6.71	2.36	0.000188021	0.0319724	yes	up	NovelLncRNA	ENST00000418931.6	MSTRG.246995	-	HLA-DPB1	lncRNA	14.4595	6.22073	45.0428	9.73728	36.1737	179.762	25.7061	212.276	21.9105	329.456	22.33	153.82	2.78	6.46e-91	2.33e-87	yes	up	protein_coding	APOE-201	ENSG00000130203.9_3	protein_coding	ENST00000252486.8
ENST00000429730.1	HLA-DRA	0.951504	0.951504	trans	0.009558	0.137477	1.30742	0.496152	0.659683	2.83388	1.97939	3.91676	1.80286	14.2103	0.52	4.95	3.24	6.58e-05	0.0128349	yes	up	lincRNA	LINC01857-201	ENSG00000224137.1_2	lincRNA	LINC01857	lncRNA	169.646	357.152	405.436	233.762	505.967	460.675	601.141	883.124	624.753	1590.93	334.39	832.13	1.32	1.7e-122	9e-119	yes	up	protein_coding	HLA-DRA-202	ENSG00000204287.13_3	protein_coding	ENST00000395388.6
ENST00000499098.1	KCTD3	0.951464	0.951464	trans	5.63234	7.51309	6.38303	9.98209	9.41123	1.83162	0.633777	3.68248	3.07844	1.3284	7.78	2.11	-1.88	4.99e-07	0.000154883	yes	down	antisense_RNA	AC096564.1-201	ENSG00000245293.2_4	antisense_RNA	AC096564.1	lncRNA	6.23671	8.39357	6.20733	13.0746	11.1861	2.26671	2.55801	4.00502	6.32519	2.34702	9.02	3.5	-1.37	4.91e-06	0.00127634	yes	down	protein_coding	KCTD3-201	ENSG00000136636.12_3	protein_coding	ENST00000259154.8
ENST00000602711.1	GRINA	0.950698	0.950698	trans	4.00317	4.84342	8.63375	2.49243	9.53212	18.1752	11.8053	24.306	7.31206	35.5636	5.9	19.43	1.72	1.54e-06	0.000439593	yes	up	sense_intronic	AC025857.2-201	ENSG00000269899.1_4	sense_intronic	AC025857.2	lncRNA	10.3272	13.3153	17.8623	9.96781	12.4779	35.0814	24.7652	31.3682	12.5074	45.0197	12.79	29.75	1.22	5.17e-05	0.0104583	yes	up	protein_coding	GRINA-202	ENSG00000178719.16_3	protein_coding	ENST00000395068.8
MSTRG.93124.1	HIST1H2BI	0.950641	0.950641	trans	0	0	0.049056	0	0.624409	37.3412	42.7296	22.7203	0.072424	295.269	0.13	79.63	9.21	3.81e-69	1.04e-65	yes	up	NovelLncRNA	ENST00000641978.1	MSTRG.93124	-	IGHG4	lncRNA	1.19265	3.24785	1.35024	3.66267	5.47158	8.48874	15.0237	8.54057	7.53056	32.678	2.98	14.45	2.28	9.66e-08	3.39e-05	yes	up	protein_coding	HIST1H2BI-201	ENSG00000278588.1_2	protein_coding	ENST00000377733.3
MSTRG.93125.4	CXCL9	0.950552	0.950552	trans	0	0	0.009938	0	0	11.3823	10.3405	24.2382	0	53.3567	0	19.86	13.29	2.44e-10	1.15e-07	yes	up	NovelLncRNA	ENST00000641136.1	MSTRG.93125	-	IGHG3	lncRNA	2.7027	7.27372	4.32362	5.0952	25.8521	55.4174	11.3106	75.069	19.8972	360.08	9.05	104.35	3.53	5.78e-82	1.91e-78	yes	up	protein_coding	CXCL9-201	ENSG00000138755.5_3	protein_coding	ENST00000264888.5
ENST00000429730.1	SERPING1	0.950389	0.950389	trans	0.009558	0.137477	1.30742	0.496152	0.659683	2.83388	1.97939	3.91676	1.80286	14.2103	0.52	4.95	3.24	6.58e-05	0.0128349	yes	up	lincRNA	LINC01857-201	ENSG00000224137.1_2	lincRNA	LINC01857	lncRNA	1.07986	0	0	0	0	0	0	0	0	26.7463	0.22	5.35	4.63	1.27e-06	0.000368608	yes	up	protein_coding	SERPING1-202	ENSG00000149131.15_3	protein_coding	ENST00000340687.10
MSTRG.213352.17	EDN1	0.95037	0.95037	trans	2.89851	6.95165	0.56411	4.71523	3.84999	0.482734	0.798633	0.95244	1.87166	0.613678	3.8	0.94	-2.01	0.000289578	0.0460805	yes	down	NovelLncRNA	ENST00000394684.8	MSTRG.213352	-	SGMS2	lncRNA	27.9371	48.4317	6.97775	50.4125	36.6091	7.15608	2.05805	4.06395	12.6671	0.256867	34.07	5.24	-2.7	2.05e-35	3.05e-32	yes	down	protein_coding	EDN1-201	ENSG00000078401.6_3	protein_coding	ENST00000379375.5
ENST00000429730.1	RPS26	0.949865	0.949865	trans	0.009558	0.137477	1.30742	0.496152	0.659683	2.83388	1.97939	3.91676	1.80286	14.2103	0.52	4.95	3.24	6.58e-05	0.0128349	yes	up	lincRNA	LINC01857-201	ENSG00000224137.1_2	lincRNA	LINC01857	lncRNA	0	0	0	0	0	0	0.012753	10.0875	0	21.7285	0	6.37	9.32	3.52e-08	1.32e-05	yes	up	protein_coding	RPS26-201	ENSG00000197728.9_3	protein_coding	ENST00000356464.9
MSTRG.169480.1	CA4	0.949602	0.949602	trans	0	8.45646	0	8.86978	0	0	0	0	0	0	3.47	0	-8.44	3.39e-06	0.000904746	yes	down	NovelLncRNA	ENST00000371621.4	MSTRG.169480	-	PTPN1	lncRNA	0.017054	10.3006	2.30186	17.1301	0.149613	0.727382	0	3.02059	1.26757	0	5.98	1	-2.58	3.38e-07	0.000109135	yes	down	protein_coding	CA4-201	ENSG00000167434.9_3	protein_coding	ENST00000300900.8
MSTRG.93125.6	PTPRCAP	0.949567	0.949567	trans	5.75836	8.58739	22.211	2.83516	2.01382	1264.25	1166.7	16.4888	36.6577	10.0191	8.28	498.82	5.91	0	0	yes	up	NovelLncRNA	ENST00000390548.6	MSTRG.93125	-	IGHG1	lncRNA	2.41681	4.45182	2.10766	1.42249	2.66069	25.0993	21.1456	7.94234	4.6407	9.5347	2.61	13.67	2.39	7.05e-08	2.53e-05	yes	up	protein_coding	PTPRCAP-201	ENSG00000213402.2_3	protein_coding	ENST00000326294.3
ENST00000602711.1	CTSS	0.949382	0.949382	trans	4.00317	4.84342	8.63375	2.49243	9.53212	18.1752	11.8053	24.306	7.31206	35.5636	5.9	19.43	1.72	1.54e-06	0.000439593	yes	up	sense_intronic	AC025857.2-201	ENSG00000269899.1_4	sense_intronic	AC025857.2	lncRNA	10.3711	22.5732	12.4709	12.0272	23.8391	34.0145	46.2665	60.7816	18.2568	90.7808	16.26	50.02	1.62	3.66e-13	2.21e-10	yes	up	protein_coding	CTSS-201	ENSG00000163131.10_3	protein_coding	ENST00000368985.7
MSTRG.93125.4	HIST1H4K	0.949074	0.949074	trans	0	0	0.009938	0	0	11.3823	10.3405	24.2382	0	53.3567	0	19.86	13.29	2.44e-10	1.15e-07	yes	up	NovelLncRNA	ENST00000641136.1	MSTRG.93125	-	IGHG3	lncRNA	5.42752	6.96734	10.201	11.2196	12.5709	25.4969	31.3403	27.457	12.6499	56.994	9.28	30.79	1.73	1.14e-09	5.06e-07	yes	up	protein_coding	HIST1H4K-201	ENSG00000273542.1_2	protein_coding	ENST00000611927.1
MSTRG.93125.4	TXN	0.948805	0.948805	trans	0	0	0.009938	0	0	11.3823	10.3405	24.2382	0	53.3567	0	19.86	13.29	2.44e-10	1.15e-07	yes	up	NovelLncRNA	ENST00000641136.1	MSTRG.93125	-	IGHG3	lncRNA	17.8316	38.762	12.9926	21.9642	18.503	30.9044	50.2541	50.2597	20.6857	107.473	22.01	51.92	1.24	4.82e-08	1.77e-05	yes	up	protein_coding	TXN-202	ENSG00000136810.12_3	protein_coding	ENST00000374517.5
ENST00000429730.1	CYP27B1	0.948613	0.948613	trans	0.009558	0.137477	1.30742	0.496152	0.659683	2.83388	1.97939	3.91676	1.80286	14.2103	0.52	4.95	3.24	6.58e-05	0.0128349	yes	up	lincRNA	LINC01857-201	ENSG00000224137.1_2	lincRNA	LINC01857	lncRNA	0	0	0	0	0	5.25906	1.81836	0.183281	0	16.2695	0	4.71	8.88	2.42e-06	0.000665587	yes	up	protein_coding	CYP27B1-201	ENSG00000111012.9_3	protein_coding	ENST00000228606.8
ENST00000620635.1	THBD	0.948406	0.948406	trans	9.31867	6.5365	3.05319	6.65603	2.68266	1.47872	1.98479	2.08795	2.49397	1.36736	5.65	1.88	-1.59	8.94e-05	0.0168151	yes	down	lincRNA	AC068870.2-201	ENSG00000277782.1_3	lincRNA	AC068870.2	lncRNA	27.745	26.597	11.7086	30.5766	9.72249	5.8231	7.33213	7.65186	11.5326	3.24545	21.27	7.12	-1.58	3.28e-14	2.15e-11	yes	down	protein_coding	THBD-201	ENSG00000178726.6_3	protein_coding	ENST00000377103.2
ENST00000499098.1	UBL3	0.946533	0.946533	trans	5.63234	7.51309	6.38303	9.98209	9.41123	1.83162	0.633777	3.68248	3.07844	1.3284	7.78	2.11	-1.88	4.99e-07	0.000154883	yes	down	antisense_RNA	AC096564.1-201	ENSG00000245293.2_4	antisense_RNA	AC096564.1	lncRNA	5.38115	9.83145	7.69962	11.9269	9.96404	2.70602	3.33612	4.9831	5.26622	4.69883	8.96	4.2	-1.09	5.52e-05	0.0110477	yes	down	protein_coding	UBL3-201	ENSG00000122042.9_3	protein_coding	ENST00000380680.4
ENST00000563635.5	TNNC1	0.946383	0.946383	trans	10.9089	23.6852	23.369	24.6353	21.4244	4.04301	1.77789	11.762	7.08141	3.94093	20.8	5.72	-1.86	3e-16	2.19e-13	yes	down	processed_transcript	AL137782.1-201	ENSG00000261553.5_4	processed_transcript	AL137782.1	lncRNA	3.0182	11.4286	8.28324	7.334	6.92641	0.111674	0.092388	2.058	2.48233	0.376771	7.4	1.02	-2.85	3.34e-09	1.41e-06	yes	down	protein_coding	TNNC1-201	ENSG00000114854.7_3	protein_coding	ENST00000232975.7
MSTRG.93124.1	PPA1	0.946252	0.946252	trans	0	0	0.049056	0	0.624409	37.3412	42.7296	22.7203	0.072424	295.269	0.13	79.63	9.21	3.81e-69	1.04e-65	yes	up	NovelLncRNA	ENST00000641978.1	MSTRG.93124	-	IGHG4	lncRNA	8.52785	13.3214	7.47721	12.62	1.45215	18.8469	17.8069	15.1626	8.19252	45.5028	8.68	21.1	1.28	0.000282962	0.0452956	yes	up	protein_coding	PPA1-202	ENSG00000180817.11_3	protein_coding	ENST00000373232.7
MSTRG.147376.2	GLUL	0.946056	0.946056	trans	0.350853	0.094075	0.219168	0	0.051382	1.07069	4.34511	16.1663	1.8983	0.345139	0.14	4.77	5.06	2.96e-06	0.000799536	yes	up	NovelLncRNA	ENST00000390237.2	MSTRG.147376	-	IGKC	lncRNA	5.50466	10.0947	9.98602	12.9971	8.29225	25.2685	39.2785	88.8748	11.4417	31.1674	9.37	39.21	2.06	5.83e-16	4.18e-13	yes	up	protein_coding	GLUL-203	ENSG00000135821.17_3	protein_coding	ENST00000339526.8
MSTRG.93125.4	MMP7	0.945914	0.945914	trans	0	0	0.009938	0	0	11.3823	10.3405	24.2382	0	53.3567	0	19.86	13.29	2.44e-10	1.15e-07	yes	up	NovelLncRNA	ENST00000641136.1	MSTRG.93125	-	IGHG3	lncRNA	0.505864	1.17822	1.0283	0.71534	4.23408	11.201	6.511	14.1573	7.91817	78.6645	1.53	23.69	3.95	5.76e-22	5.74e-19	yes	up	protein_coding	MMP7-201	ENSG00000137673.8_3	protein_coding	ENST00000260227.4
MSTRG.213352.17	TACSTD2	0.945745	0.945745	trans	2.89851	6.95165	0.56411	4.71523	3.84999	0.482734	0.798633	0.95244	1.87166	0.613678	3.8	0.94	-2.01	0.000289578	0.0460805	yes	down	NovelLncRNA	ENST00000394684.8	MSTRG.213352	-	SGMS2	lncRNA	11.7643	27.6268	10.5916	21.1754	18.9357	5.9659	1.56861	4.83315	7.54828	5.47732	18.02	5.08	-1.83	4.98e-14	3.22e-11	yes	down	protein_coding	TACSTD2-201	ENSG00000184292.6_3	protein_coding	ENST00000371225.3
MSTRG.147387.3	PI3	0.945704	0.945704	trans	0.006522	0.136724	0.006813	0	0.275125	21.9365	41.9113	2.18333	2.7263	0.636082	0.09	13.88	7.35	1.33e-15	9.39e-13	yes	up	NovelLncRNA	ENST00000390252.2	MSTRG.147387	-	IGKV3-15	lncRNA	1.35623	2.1623	0	1.59793	0.652373	30.8574	32.3052	0.491897	0.842644	0.246936	1.15	12.95	3.49	1.87e-11	9.87e-09	yes	up	protein_coding	PI3-201	ENSG00000124102.4_3	protein_coding	ENST00000243924.3
MSTRG.246995.1	C1QB	0.945162	0.945162	trans	0	0	2.55594	0	3.99632	6.06922	0	12.5767	1.35093	13.5371	1.31	6.71	2.36	0.000188021	0.0319724	yes	up	NovelLncRNA	ENST00000418931.6	MSTRG.246995	-	HLA-DPB1	lncRNA	35.7548	30.5568	100.817	2.2855	76.9454	96.8535	92.6493	231.984	57.7002	278.296	49.27	151.5	1.62	1.26e-36	1.93e-33	yes	up	protein_coding	C1QB-201	ENSG00000173369.15_3	protein_coding	ENST00000314933.6
MSTRG.93125.6	SSR4	0.945119	0.945119	trans	5.75836	8.58739	22.211	2.83516	2.01382	1264.25	1166.7	16.4888	36.6577	10.0191	8.28	498.82	5.91	0	0	yes	up	NovelLncRNA	ENST00000390548.6	MSTRG.93125	-	IGHG1	lncRNA	3.97278	4.81706	1.6399	7.7445	2.50724	47.533	30.5823	2.7579	6.896	14.1958	4.14	20.39	2.3	1.62e-10	7.75e-08	yes	up	protein_coding	SSR4-203	ENSG00000180879.13_3	protein_coding	ENST00000370086.7
MSTRG.93125.4	UBD	0.945085	0.945085	trans	0	0	0.009938	0	0	11.3823	10.3405	24.2382	0	53.3567	0	19.86	13.29	2.44e-10	1.15e-07	yes	up	NovelLncRNA	ENST00000641136.1	MSTRG.93125	-	IGHG3	lncRNA	0.512831	2.08115	0.658074	0.910999	4.15746	11.0088	2.53945	16.3097	4.47414	90.1825	1.66	24.9	3.9	8.63e-23	8.83e-20	yes	up	protein_coding	UBD-203	ENSG00000213886.3_3	protein_coding	ENST00000377050.4
MSTRG.93125.4	CAPG	0.940866	0.944946	trans	0	0	0.009938	0	0	11.3823	10.3405	24.2382	0	53.3567	0	19.86	13.29	2.44e-10	1.15e-07	yes	up	NovelLncRNA	ENST00000641136.1	MSTRG.93125	-	IGHG3	lncRNA	0	0	0	0	0	0	0	23.4077	0	34.6216	0	11.61	10.18	1.4e-13	8.81e-11	yes	up	protein_coding	CAPG-205	ENSG00000042493.15_3	protein_coding	ENST00000409921.5
MSTRG.93125.4	CAPG	0.944946	0.944946	trans	0	0	0.009938	0	0	11.3823	10.3405	24.2382	0	53.3567	0	19.86	13.29	2.44e-10	1.15e-07	yes	up	NovelLncRNA	ENST00000641136.1	MSTRG.93125	-	IGHG3	lncRNA	0	0	0	0	0	0	0	23.4077	0	34.6216	0	11.61	10.18	1.4e-13	8.81e-11	yes	up	protein_coding	CAPG-205	ENSG00000042493.15_3	protein_coding	ENST00000409921.5
MSTRG.147376.2	TAGLN2	0.944554	0.944554	trans	0.350853	0.094075	0.219168	0	0.051382	1.07069	4.34511	16.1663	1.8983	0.345139	0.14	4.77	5.06	2.96e-06	0.000799536	yes	up	NovelLncRNA	ENST00000390237.2	MSTRG.147376	-	IGKC	lncRNA	0.172154	0.004026	0.057597	0.074616	0.008324	0.779728	0.989068	15.1469	0.061962	3.48351	0.06	4.09	6.01	9.83e-06	0.00240112	yes	up	protein_coding	TAGLN2-203	ENSG00000158710.14_3	protein_coding	ENST00000368097.8
MSTRG.93125.4	PTAFR	0.944259	0.944259	trans	0	0	0.009938	0	0	11.3823	10.3405	24.2382	0	53.3567	0	19.86	13.29	2.44e-10	1.15e-07	yes	up	NovelLncRNA	ENST00000641136.1	MSTRG.93125	-	IGHG3	lncRNA	0.622696	3.53627	1.24526	0	1.74117	7.88999	6.85614	7.69325	2.15416	15.4984	1.43	8.02	2.49	2.05e-05	0.0046705	yes	up	protein_coding	PTAFR-202	ENSG00000169403.11_3	protein_coding	ENST00000373857.7
MSTRG.93724.1	GREM1	0.944247	0.944247	trans	0.023055	0.004473	0.006798	0.017749	0	3.27324	8.22979	0.350965	1.86885	1.34069	0.01	3.01	8.18	0.000306542	0.048384	yes	up	NovelLncRNA	ENST00000560830.1	MSTRG.93724	-	GREM1	lncRNA	0.05351	0.09715	0.042646	0.036966	0.01811	6.06926	11.1538	0.622458	6.57439	2.76506	0.05	5.44	6.77	3.97e-07	0.000126191	yes	up	protein_coding	GREM1-203	ENSG00000166923.10_3	protein_coding	ENST00000622074.1
MSTRG.93724.1	FAM46C	0.944032	0.944032	trans	0.023055	0.004473	0.006798	0.017749	0	3.27324	8.22979	0.350965	1.86885	1.34069	0.01	3.01	8.18	0.000306542	0.048384	yes	up	NovelLncRNA	ENST00000560830.1	MSTRG.93724	-	GREM1	lncRNA	5.9277	5.77093	4.10154	3.45413	3.50349	27.5971	40.596	4.13327	6.04808	4.11561	4.55	16.5	1.86	1.82e-06	0.000514395	yes	up	protein_coding	FAM46C-201	ENSG00000183508.4_3	protein_coding	ENST00000369448.3
ENST00000602711.1	PTAFR	0.943798	0.943798	trans	4.00317	4.84342	8.63375	2.49243	9.53212	18.1752	11.8053	24.306	7.31206	35.5636	5.9	19.43	1.72	1.54e-06	0.000439593	yes	up	sense_intronic	AC025857.2-201	ENSG00000269899.1_4	sense_intronic	AC025857.2	lncRNA	0.622696	3.53627	1.24526	0	1.74117	7.88999	6.85614	7.69325	2.15416	15.4984	1.43	8.02	2.49	2.05e-05	0.0046705	yes	up	protein_coding	PTAFR-202	ENSG00000169403.11_3	protein_coding	ENST00000373857.7
MSTRG.93125.6	CCL18	0.943419	0.943419	trans	5.75836	8.58739	22.211	2.83516	2.01382	1264.25	1166.7	16.4888	36.6577	10.0191	8.28	498.82	5.91	0	0	yes	up	NovelLncRNA	ENST00000390548.6	MSTRG.93125	-	IGHG1	lncRNA	6.955	1.81873	5.99608	2.19566	19.8413	126.671	176.414	50.0475	2.45198	10.2125	7.36	73.16	3.31	2.28e-54	5.09e-51	yes	up	protein_coding	CCL18-201	ENSG00000275385.1_3	protein_coding	ENST00000616054.1
MSTRG.177316.1	CCL3L1	0.942883	0.942883	trans	2.48247	1.14692	5.21863	0.168674	0.607192	153.655	345.888	4.37876	0.887586	76.1135	1.92	116.18	5.92	1.47e-122	7.89e-119	yes	up	NovelLncRNA	ENST00000390325.2	MSTRG.177316	-	IGLC3	lncRNA	0.179858	2.32699	0	0.189204	0.254588	4.43051	26.0972	0	0	0.589289	0.59	6.22	3.4	4.39e-06	0.00114807	yes	up	protein_coding	CCL3L1-001	ENSG00000205021.9	protein_coding	ENST00000422211.2
ENST00000499098.1	CKB	0.942738	0.942738	trans	5.63234	7.51309	6.38303	9.98209	9.41123	1.83162	0.633777	3.68248	3.07844	1.3284	7.78	2.11	-1.88	4.99e-07	0.000154883	yes	down	antisense_RNA	AC096564.1-201	ENSG00000245293.2_4	antisense_RNA	AC096564.1	lncRNA	5.85288	7.40576	7.42558	10.2601	8.00858	2.63399	1.90651	5.2075	5.73906	0.912537	7.79	3.28	-1.25	5.29e-05	0.0106665	yes	down	protein_coding	CKB-201	ENSG00000166165.12_3	protein_coding	ENST00000348956.6
ENST00000589379.1	FZD4	0.942589	0.942589	trans	3.64998	2.721	2.25397	4.61814	4.11195	0.77509	0.121553	1.69942	0.766779	0.139955	3.47	0.7	-2.31	0.000212687	0.0354741	yes	down	antisense_RNA	AC011511.5-201	ENSG00000267607.1_3	antisense_RNA	AC011511.5	lncRNA	17.5009	8.42204	11.3504	16.7414	19.2103	6.65206	1.82716	8.26346	7.1179	4.23286	14.64	5.62	-1.38	4.63e-09	1.92e-06	yes	down	protein_coding	FZD4-201	ENSG00000174804.3_3	protein_coding	ENST00000531380.1
MSTRG.213352.17	C1orf115	0.942524	0.942524	trans	2.89851	6.95165	0.56411	4.71523	3.84999	0.482734	0.798633	0.95244	1.87166	0.613678	3.8	0.94	-2.01	0.000289578	0.0460805	yes	down	NovelLncRNA	ENST00000394684.8	MSTRG.213352	-	SGMS2	lncRNA	8.84377	12.8853	5.31444	11.4192	7.6076	2.91955	2.34162	3.49909	4.90575	1.93814	9.21	3.12	-1.56	6.91e-07	0.000209593	yes	down	protein_coding	C1orf115-201	ENSG00000162817.6_3	protein_coding	ENST00000294889.5
ENST00000619688.1	HBB	0.941622	0.941622	trans	19.7411	8.06963	5.19817	10.4252	3.24895	6.37826	6.44116	2.79646	4.20817	1.56931	9.34	4.28	-1.13	2.89e-05	0.00632325	yes	down	sense_intronic	AL159153.1-201	ENSG00000275611.1_4	sense_intronic	AL159153.1	lncRNA	1001.25	217.058	294.859	268.554	57.1696	116.205	74.8886	23.8053	7.75022	5.62142	367.78	45.65	-3.01	0	0	yes	down	protein_coding	HBB-201	ENSG00000244734.3_3	protein_coding	ENST00000335295.4
MSTRG.93124.1	LAPTM5	0.941491	0.941491	trans	0	0	0.049056	0	0.624409	37.3412	42.7296	22.7203	0.072424	295.269	0.13	79.63	9.21	3.81e-69	1.04e-65	yes	up	NovelLncRNA	ENST00000641978.1	MSTRG.93124	-	IGHG4	lncRNA	41.2177	34.6177	61.5081	43.3152	80.9484	127.591	108.723	120.68	56.8789	274.456	52.32	137.67	1.4	1.2e-24	1.29e-21	yes	up	protein_coding	LAPTM5-201	ENSG00000162511.7_3	protein_coding	ENST00000294507.3
MSTRG.41926.9	EDN1	0.941445	0.941445	trans	9.33504	11.1079	5.11575	9.84899	8.73034	2.91356	1.08113	3.44851	4.45224	0.488951	8.83	2.48	-1.83	1.28e-07	4.4e-05	yes	down	NovelLncRNA	ENST00000227756.4	MSTRG.41926	-	GALNT18	lncRNA	27.9371	48.4317	6.97775	50.4125	36.6091	7.15608	2.05805	4.06395	12.6671	0.256867	34.07	5.24	-2.7	2.05e-35	3.05e-32	yes	down	protein_coding	EDN1-201	ENSG00000078401.6_3	protein_coding	ENST00000379375.5
MSTRG.93125.4	HLA-DRA	0.941398	0.941398	trans	0	0	0.009938	0	0	11.3823	10.3405	24.2382	0	53.3567	0	19.86	13.29	2.44e-10	1.15e-07	yes	up	NovelLncRNA	ENST00000641136.1	MSTRG.93125	-	IGHG3	lncRNA	169.646	357.152	405.436	233.762	505.967	460.675	601.141	883.124	624.753	1590.93	334.39	832.13	1.32	1.7e-122	9e-119	yes	up	protein_coding	HLA-DRA-202	ENSG00000204287.13_3	protein_coding	ENST00000395388.6
ENST00000555688.1	B3GNT5	0.941198	0.941198	trans	8.38361	7.81955	3.70913	9.41734	5.15456	2.55299	3.05767	3.24749	4.463	1.78727	6.9	3.02	-1.19	0.000210106	0.035155	yes	down	lincRNA	LINC00641-202	ENSG00000258441.1_2	processed_transcript	LINC00641	lncRNA	10.0607	11.8649	5.36516	13.6089	8.7749	3.85878	5.27528	2.43469	4.10008	2.70775	9.93	3.68	-1.43	8.44e-07	0.000252267	yes	down	protein_coding	B3GNT5-201	ENSG00000176597.11_3	protein_coding	ENST00000326505.3
MSTRG.93125.4	CCL5	0.941032	0.941032	trans	0	0	0.009938	0	0	11.3823	10.3405	24.2382	0	53.3567	0	19.86	13.29	2.44e-10	1.15e-07	yes	up	NovelLncRNA	ENST00000641136.1	MSTRG.93125	-	IGHG3	lncRNA	6.58829	7.82407	6.05471	9.90355	9.25835	24.7777	11.6086	19.6236	16.257	67.3021	7.93	27.91	1.82	1.23e-09	5.46e-07	yes	up	protein_coding	CCL5-201	ENSG00000271503.5_3	protein_coding	ENST00000603197.5
MSTRG.85501.1	CXCL13	0.941018	0.941018	trans	0	0	0	0	0	0	43.9449	0	0	0	0	8.79	9.78	9.64e-11	4.75e-08	yes	up	NovelLncRNA	ENST00000635274.1	MSTRG.85501	-	AL139099.5	lncRNA	0.044188	0.351025	1.10193	0.122308	0.800507	37.206	124.494	7.71081	26.6443	16.8483	0.48	42.58	6.46	4.72e-46	8.84e-43	yes	up	protein_coding	CXCL13-201	ENSG00000156234.7_3	protein_coding	ENST00000286758.4
ENST00000499098.1	MAMDC2	0.940972	0.940972	trans	5.63234	7.51309	6.38303	9.98209	9.41123	1.83162	0.633777	3.68248	3.07844	1.3284	7.78	2.11	-1.88	4.99e-07	0.000154883	yes	down	antisense_RNA	AC096564.1-201	ENSG00000245293.2_4	antisense_RNA	AC096564.1	lncRNA	12.0164	13.4333	10.2517	20.3471	11.623	0.729145	0.148974	5.35653	6.43966	0.321451	13.53	2.6	-2.38	1.22e-13	7.68e-11	yes	down	protein_coding	MAMDC2-201	ENSG00000165072.9_3	protein_coding	ENST00000377182.4
MSTRG.93724.1	CCL3L1	0.940885	0.940885	trans	0.023055	0.004473	0.006798	0.017749	0	3.27324	8.22979	0.350965	1.86885	1.34069	0.01	3.01	8.18	0.000306542	0.048384	yes	up	NovelLncRNA	ENST00000560830.1	MSTRG.93724	-	GREM1	lncRNA	0.179858	2.32699	0	0.189204	0.254588	4.43051	26.0972	0	0	0.589289	0.59	6.22	3.4	4.39e-06	0.00114807	yes	up	protein_coding	CCL3L1-001	ENSG00000205021.9	protein_coding	ENST00000422211.2
MSTRG.246995.1	HLA-DQA1	0.940673	0.940673	trans	0	0	2.55594	0	3.99632	6.06922	0	12.5767	1.35093	13.5371	1.31	6.71	2.36	0.000188021	0.0319724	yes	up	NovelLncRNA	ENST00000418931.6	MSTRG.246995	-	HLA-DPB1	lncRNA	7.93165	2.10124	41.6337	5.27341	12.4582	20.9021	7.26334	101.101	15.5061	120.213	13.88	53	1.93	7.1e-19	6.12e-16	yes	up	protein_coding	HLA-DQA1-201	ENSG00000196735.11_3	protein_coding	ENST00000343139.9
ENST00000456363.1	CKB	0.940639	0.940639	trans	17.8198	24.6725	35.0572	40.9557	32.1116	2.57261	1.99956	12.9551	28.5294	4.56757	30.12	10.12	-1.57	2.08e-19	1.84e-16	yes	down	antisense_RNA	AC093110.1-201	ENSG00000238018.2_3	antisense_RNA	AC093110.1	lncRNA	5.85288	7.40576	7.42558	10.2601	8.00858	2.63399	1.90651	5.2075	5.73906	0.912537	7.79	3.28	-1.25	5.29e-05	0.0106665	yes	down	protein_coding	CKB-201	ENSG00000166165.12_3	protein_coding	ENST00000348956.6
MSTRG.177316.1	PLAU	0.940547	0.940547	trans	2.48247	1.14692	5.21863	0.168674	0.607192	153.655	345.888	4.37876	0.887586	76.1135	1.92	116.18	5.92	1.47e-122	7.89e-119	yes	up	NovelLncRNA	ENST00000390325.2	MSTRG.177316	-	IGLC3	lncRNA	7.36625	5.75427	0	2.27819	0	18.6834	31.4205	0	0	16.2194	3.08	13.26	2.11	1.66e-06	0.00047139	yes	up	protein_coding	PLAU-201	ENSG00000122861.15_3	protein_coding	ENST00000372764.3
MSTRG.93125.4	SPP1	0.911663	0.940221	trans	0	0	0.009938	0	0	11.3823	10.3405	24.2382	0	53.3567	0	19.86	13.29	2.44e-10	1.15e-07	yes	up	NovelLncRNA	ENST00000641136.1	MSTRG.93125	-	IGHG3	lncRNA	0	0	0	0	0	26.7356	40.4948	42.2382	0	71.6467	0	36.22	11.82	6.64e-35	9.72e-32	yes	up	protein_coding	SPP1-202	ENSG00000118785.13_3	protein_coding	ENST00000360804.4
MSTRG.93125.4	SPP1	0.917089	0.940221	trans	0	0	0.009938	0	0	11.3823	10.3405	24.2382	0	53.3567	0	19.86	13.29	2.44e-10	1.15e-07	yes	up	NovelLncRNA	ENST00000641136.1	MSTRG.93125	-	IGHG3	lncRNA	0	0	0	0	0	26.7356	40.4948	42.2382	0	71.6467	0	36.22	11.82	6.64e-35	9.72e-32	yes	up	protein_coding	SPP1-202	ENSG00000118785.13_3	protein_coding	ENST00000360804.4
MSTRG.93125.4	SPP1	0.940221	0.940221	trans	0	0	0.009938	0	0	11.3823	10.3405	24.2382	0	53.3567	0	19.86	13.29	2.44e-10	1.15e-07	yes	up	NovelLncRNA	ENST00000641136.1	MSTRG.93125	-	IGHG3	lncRNA	0	0	0	0	0	26.7356	40.4948	42.2382	0	71.6467	0	36.22	11.82	6.64e-35	9.72e-32	yes	up	protein_coding	SPP1-202	ENSG00000118785.13_3	protein_coding	ENST00000360804.4
MSTRG.93125.4	HIST1H4J	0.939685	0.939685	trans	0	0	0.009938	0	0	11.3823	10.3405	24.2382	0	53.3567	0	19.86	13.29	2.44e-10	1.15e-07	yes	up	NovelLncRNA	ENST00000641136.1	MSTRG.93125	-	IGHG3	lncRNA	4.59952	5.97521	7.99272	7.24263	10.5017	21.1026	26.2517	21.9979	8.67386	44.8489	7.26	24.57	1.76	3.27e-08	1.23e-05	yes	up	protein_coding	HIST1H4J-201	ENSG00000197238.4_3	protein_coding	ENST00000355057.2
MSTRG.177254.3	CREB3L2	0.93911	0.93911	trans	0	0.115079	0.130311	0	0.114651	6.95054	18.0096	0.337577	0.131657	0.82908	0.07	5.25	6.19	5.45e-07	0.000168047	yes	up	NovelLncRNA	ENST00000390297.3	MSTRG.177254	-	IGLV1-44	lncRNA	0.658279	0.973158	1.12619	1.76427	1.19974	1.99946	29.5811	0.7541	1.75362	1.28234	1.14	7.07	2.63	3.12e-05	0.00676701	yes	up	protein_coding	CREB3L2-201	ENSG00000182158.14_3	protein_coding	ENST00000330387.10
ENST00000555688.1	BMPR2	0.939105	0.939105	trans	8.38361	7.81955	3.70913	9.41734	5.15456	2.55299	3.05767	3.24749	4.463	1.78727	6.9	3.02	-1.19	0.000210106	0.035155	yes	down	lincRNA	LINC00641-202	ENSG00000258441.1_2	processed_transcript	LINC00641	lncRNA	31.287	32.9888	15.5183	44.4693	30.4774	5.37462	9.03939	10.2999	19.5436	11.4631	30.95	11.14	-1.47	1.16e-18	9.86e-16	yes	down	protein_coding	BMPR2-202	ENSG00000204217.13_3	protein_coding	ENST00000374580.8
MSTRG.93125.4	DEDD	0.939039	0.939039	trans	0	0	0.009938	0	0	11.3823	10.3405	24.2382	0	53.3567	0	19.86	13.29	2.44e-10	1.15e-07	yes	up	NovelLncRNA	ENST00000641136.1	MSTRG.93125	-	IGHG3	lncRNA	0.085515	0.052212	0.024825	0.147025	0.12833	0.75377	3.39173	4.38936	0.166266	6.47398	0.09	3.04	5.11	0.000185103	0.0315656	yes	up	protein_coding	DEDD-202	ENSG00000158796.16_3	protein_coding	ENST00000368006.7
ENST00000446372.2	CKB	0.939026	0.939026	trans	2.34231	6.2857	6.12061	7.52794	5.40091	0.589612	0.588399	1.48897	3.68316	0.16996	5.54	1.3	-2.09	8.24e-06	0.00204015	yes	down	lincRNA	SFTA1P-203	ENSG00000225383.7_3	lincRNA	SFTA1P	lncRNA	5.85288	7.40576	7.42558	10.2601	8.00858	2.63399	1.90651	5.2075	5.73906	0.912537	7.79	3.28	-1.25	5.29e-05	0.0106665	yes	down	protein_coding	CKB-201	ENSG00000166165.12_3	protein_coding	ENST00000348956.6
MSTRG.177254.3	CCL18	0.939002	0.939002	trans	0	0.115079	0.130311	0	0.114651	6.95054	18.0096	0.337577	0.131657	0.82908	0.07	5.25	6.19	5.45e-07	0.000168047	yes	up	NovelLncRNA	ENST00000390297.3	MSTRG.177254	-	IGLV1-44	lncRNA	6.955	1.81873	5.99608	2.19566	19.8413	126.671	176.414	50.0475	2.45198	10.2125	7.36	73.16	3.31	2.28e-54	5.09e-51	yes	up	protein_coding	CCL18-201	ENSG00000275385.1_3	protein_coding	ENST00000616054.1
ENST00000429730.1	HIST1H2BI	0.938905	0.938905	trans	0.009558	0.137477	1.30742	0.496152	0.659683	2.83388	1.97939	3.91676	1.80286	14.2103	0.52	4.95	3.24	6.58e-05	0.0128349	yes	up	lincRNA	LINC01857-201	ENSG00000224137.1_2	lincRNA	LINC01857	lncRNA	1.19265	3.24785	1.35024	3.66267	5.47158	8.48874	15.0237	8.54057	7.53056	32.678	2.98	14.45	2.28	9.66e-08	3.39e-05	yes	up	protein_coding	HIST1H2BI-201	ENSG00000278588.1_2	protein_coding	ENST00000377733.3
MSTRG.177316.1	PIM2	0.938622	0.938622	trans	2.48247	1.14692	5.21863	0.168674	0.607192	153.655	345.888	4.37876	0.887586	76.1135	1.92	116.18	5.92	1.47e-122	7.89e-119	yes	up	NovelLncRNA	ENST00000390325.2	MSTRG.177316	-	IGLC3	lncRNA	2.9175	6.50258	0	2.50122	2.12116	35.9958	44.7131	3.3825	0	4.85093	2.81	17.79	2.66	2.62e-11	1.36e-08	yes	up	protein_coding	PIM2-201	ENSG00000102096.9_3	protein_coding	ENST00000376509.4
MSTRG.93125.4	FCER1G	0.938523	0.938523	trans	0	0	0.009938	0	0	11.3823	10.3405	24.2382	0	53.3567	0	19.86	13.29	2.44e-10	1.15e-07	yes	up	NovelLncRNA	ENST00000641136.1	MSTRG.93125	-	IGHG3	lncRNA	24.1599	20.8105	39.3476	11.3956	31.6745	68.1987	44.3957	67.2073	28.2886	111.426	25.48	63.9	1.33	4.6e-11	2.34e-08	yes	up	protein_coding	FCER1G-201	ENSG00000158869.10_3	protein_coding	ENST00000289902.1
ENST00000429730.1	PTGDS	0.938402	0.938402	trans	0.009558	0.137477	1.30742	0.496152	0.659683	2.83388	1.97939	3.91676	1.80286	14.2103	0.52	4.95	3.24	6.58e-05	0.0128349	yes	up	lincRNA	LINC01857-201	ENSG00000224137.1_2	lincRNA	LINC01857	lncRNA	48.4797	37.8832	71.97	58.5343	30.1694	80.0104	54.6274	164.315	107.873	266.548	49.41	134.67	1.45	4.83e-26	5.47e-23	yes	up	protein_coding	PTGDS-202	ENSG00000107317.12_3	protein_coding	ENST00000371625.7
ENST00000429730.1	CILP	0.938029	0.938029	trans	0.009558	0.137477	1.30742	0.496152	0.659683	2.83388	1.97939	3.91676	1.80286	14.2103	0.52	4.95	3.24	6.58e-05	0.0128349	yes	up	lincRNA	LINC01857-201	ENSG00000224137.1_2	lincRNA	LINC01857	lncRNA	5.45998	0.474559	0.758401	0.393324	0.151221	0.724886	4.40928	14.2844	3.57911	30.3732	1.45	10.67	2.88	5.03e-08	1.84e-05	yes	up	protein_coding	CILP-201	ENSG00000138615.5_3	protein_coding	ENST00000261883.5
MSTRG.93125.4	PSMB9	0.937899	0.937899	trans	0	0	0.009938	0	0	11.3823	10.3405	24.2382	0	53.3567	0	19.86	13.29	2.44e-10	1.15e-07	yes	up	NovelLncRNA	ENST00000641136.1	MSTRG.93125	-	IGHG3	lncRNA	10.7702	19.8165	1.68824	1.98053	3.20952	18.025	18.6365	24.8021	2.47634	54.8699	7.49	23.76	1.67	2.66e-07	8.73e-05	yes	up	protein_coding	PSMB9-207	ENSG00000240065.7_3	protein_coding	ENST00000374859.2
ENST00000429730.1	ANKRD22	0.937799	0.937799	trans	0.009558	0.137477	1.30742	0.496152	0.659683	2.83388	1.97939	3.91676	1.80286	14.2103	0.52	4.95	3.24	6.58e-05	0.0128349	yes	up	lincRNA	LINC01857-201	ENSG00000224137.1_2	lincRNA	LINC01857	lncRNA	0.894932	0.803465	0.775398	0.364184	2.07474	6.6386	1.41873	8.26822	2.20546	15.1777	0.98	6.74	2.78	2.37e-05	0.00532021	yes	up	protein_coding	ANKRD22-201	ENSG00000152766.5_3	protein_coding	ENST00000371930.4
MSTRG.93124.1	RPS24	0.937726	0.937726	trans	0	0	0.049056	0	0.624409	37.3412	42.7296	22.7203	0.072424	295.269	0.13	79.63	9.21	3.81e-69	1.04e-65	yes	up	NovelLncRNA	ENST00000641978.1	MSTRG.93124	-	IGHG4	lncRNA	1.18636	3.06555	0.457752	0	1.48199	37.6633	4.6515	3.09274	7.74152	83.475	1.24	27.32	4.46	2.52e-27	2.96e-24	yes	up	protein_coding	RPS24-202	ENSG00000138326.18_3	protein_coding	ENST00000372360.7
MSTRG.177254.3	PIM2	0.937559	0.937559	trans	0	0.115079	0.130311	0	0.114651	6.95054	18.0096	0.337577	0.131657	0.82908	0.07	5.25	6.19	5.45e-07	0.000168047	yes	up	NovelLncRNA	ENST00000390297.3	MSTRG.177254	-	IGLV1-44	lncRNA	2.9175	6.50258	0	2.50122	2.12116	35.9958	44.7131	3.3825	0	4.85093	2.81	17.79	2.66	2.62e-11	1.36e-08	yes	up	protein_coding	PIM2-201	ENSG00000102096.9_3	protein_coding	ENST00000376509.4
ENST00000589379.1	EPAS1	0.93721	0.93721	trans	3.64998	2.721	2.25397	4.61814	4.11195	0.77509	0.121553	1.69942	0.766779	0.139955	3.47	0.7	-2.31	0.000212687	0.0354741	yes	down	antisense_RNA	AC011511.5-201	ENSG00000267607.1_3	antisense_RNA	AC011511.5	lncRNA	333.184	297.145	168.033	386.861	271.043	72.7853	58.5127	103.031	147.795	26.2465	291.25	81.67	-1.83	2.22e-202	2.05e-198	yes	down	protein_coding	EPAS1-201	ENSG00000116016.13_3	protein_coding	ENST00000263734.4
MSTRG.147003.1	RPS20	0.937118	0.937118	trans	0	1.91349	1.14357	0.503937	1.99392	0	0.603281	87.6206	32.7059	1.6726	1.11	24.52	4.46	1.09e-24	1.17e-21	yes	up	NovelLncRNA	ENST00000519937.6	MSTRG.147003	-	SFTPB	lncRNA	0	0.232674	0	0.000894	0	0.212121	0.023144	35.7971	0.31146	0	0.05	7.27	7.28	6.82e-09	2.78e-06	yes	up	protein_coding	RPS20-212	ENSG00000008988.9_3	protein_coding	ENST00000618656.1
MSTRG.147003.1	RPS20	0.934949	0.937118	trans	0	1.91349	1.14357	0.503937	1.99392	0	0.603281	87.6206	32.7059	1.6726	1.11	24.52	4.46	1.09e-24	1.17e-21	yes	up	NovelLncRNA	ENST00000519937.6	MSTRG.147003	-	SFTPB	lncRNA	0	0.232674	0	0.000894	0	0.212121	0.023144	35.7971	0.31146	0	0.05	7.27	7.28	6.82e-09	2.78e-06	yes	up	protein_coding	RPS20-212	ENSG00000008988.9_3	protein_coding	ENST00000618656.1
ENST00000555688.1	C1orf115	0.935923	0.935923	trans	8.38361	7.81955	3.70913	9.41734	5.15456	2.55299	3.05767	3.24749	4.463	1.78727	6.9	3.02	-1.19	0.000210106	0.035155	yes	down	lincRNA	LINC00641-202	ENSG00000258441.1_2	processed_transcript	LINC00641	lncRNA	8.84377	12.8853	5.31444	11.4192	7.6076	2.91955	2.34162	3.49909	4.90575	1.93814	9.21	3.12	-1.56	6.91e-07	0.000209593	yes	down	protein_coding	C1orf115-201	ENSG00000162817.6_3	protein_coding	ENST00000294889.5
ENST00000619688.1	MT1E	0.935524	0.935524	trans	19.7411	8.06963	5.19817	10.4252	3.24895	6.37826	6.44116	2.79646	4.20817	1.56931	9.34	4.28	-1.13	2.89e-05	0.00632325	yes	down	sense_intronic	AL159153.1-201	ENSG00000275611.1_4	sense_intronic	AL159153.1	lncRNA	417.943	53.5967	36.62	97.6029	35.7067	45.8473	36.6562	23.5333	26.2602	17.6957	128.29	30	-2.1	9.9e-103	4.22e-99	yes	down	protein_coding	MT1E-201	ENSG00000169715.14_3	protein_coding	ENST00000306061.10
ENST00000619688.1	MT1E	0.926282	0.935524	trans	19.7411	8.06963	5.19817	10.4252	3.24895	6.37826	6.44116	2.79646	4.20817	1.56931	9.34	4.28	-1.13	2.89e-05	0.00632325	yes	down	sense_intronic	AL159153.1-201	ENSG00000275611.1_4	sense_intronic	AL159153.1	lncRNA	417.943	53.5967	36.62	97.6029	35.7067	45.8473	36.6562	23.5333	26.2602	17.6957	128.29	30	-2.1	9.9e-103	4.22e-99	yes	down	protein_coding	MT1E-201	ENSG00000169715.14_3	protein_coding	ENST00000306061.10
ENST00000619688.1	MT1E	0.914178	0.935524	trans	19.7411	8.06963	5.19817	10.4252	3.24895	6.37826	6.44116	2.79646	4.20817	1.56931	9.34	4.28	-1.13	2.89e-05	0.00632325	yes	down	sense_intronic	AL159153.1-201	ENSG00000275611.1_4	sense_intronic	AL159153.1	lncRNA	417.943	53.5967	36.62	97.6029	35.7067	45.8473	36.6562	23.5333	26.2602	17.6957	128.29	30	-2.1	9.9e-103	4.22e-99	yes	down	protein_coding	MT1E-201	ENSG00000169715.14_3	protein_coding	ENST00000306061.10
MSTRG.147387.3	CCL3L1	0.934848	0.934848	trans	0.006522	0.136724	0.006813	0	0.275125	21.9365	41.9113	2.18333	2.7263	0.636082	0.09	13.88	7.35	1.33e-15	9.39e-13	yes	up	NovelLncRNA	ENST00000390252.2	MSTRG.147387	-	IGKV3-15	lncRNA	0.179858	2.32699	0	0.189204	0.254588	4.43051	26.0972	0	0	0.589289	0.59	6.22	3.4	4.39e-06	0.00114807	yes	up	protein_coding	CCL3L1-001	ENSG00000205021.9	protein_coding	ENST00000422211.2
MSTRG.93125.4	APOE	0.934529	0.934529	trans	0	0	0.009938	0	0	11.3823	10.3405	24.2382	0	53.3567	0	19.86	13.29	2.44e-10	1.15e-07	yes	up	NovelLncRNA	ENST00000641136.1	MSTRG.93125	-	IGHG3	lncRNA	14.4595	6.22073	45.0428	9.73728	36.1737	179.762	25.7061	212.276	21.9105	329.456	22.33	153.82	2.78	6.46e-91	2.33e-87	yes	up	protein_coding	APOE-201	ENSG00000130203.9_3	protein_coding	ENST00000252486.8
MSTRG.93125.4	FTH1	0.934476	0.934476	trans	0	0	0.009938	0	0	11.3823	10.3405	24.2382	0	53.3567	0	19.86	13.29	2.44e-10	1.15e-07	yes	up	NovelLncRNA	ENST00000641136.1	MSTRG.93125	-	IGHG3	lncRNA	203.181	274.248	330.514	173.585	67.8501	376.328	600.047	462.468	321.571	1343.83	209.88	620.85	1.56	1.54e-134	9.44e-131	yes	up	protein_coding	FTH1-201	ENSG00000167996.15_3	protein_coding	ENST00000273550.11
ENST00000555688.1	S1PR1	0.933771	0.933771	trans	8.38361	7.81955	3.70913	9.41734	5.15456	2.55299	3.05767	3.24749	4.463	1.78727	6.9	3.02	-1.19	0.000210106	0.035155	yes	down	lincRNA	LINC00641-202	ENSG00000258441.1_2	processed_transcript	LINC00641	lncRNA	58.2386	28.7149	21.4122	57.4383	21.1046	10.4291	8.21082	11.5861	18.0918	4.48932	37.38	10.56	-1.82	2.25e-27	2.66e-24	yes	down	protein_coding	S1PR1-201	ENSG00000170989.8_3	protein_coding	ENST00000305352.6
ENST00000620635.1	SOX7	0.93351	0.93351	trans	9.31867	6.5365	3.05319	6.65603	2.68266	1.47872	1.98479	2.08795	2.49397	1.36736	5.65	1.88	-1.59	8.94e-05	0.0168151	yes	down	lincRNA	AC068870.2-201	ENSG00000277782.1_3	lincRNA	AC068870.2	lncRNA	20.9533	17.9122	3.26813	20.7617	8.23403	2.12986	2.44598	2.47911	10.0591	0.538878	14.23	3.53	-2.01	2.2e-12	1.26e-09	yes	down	protein_coding	SOX7-201	ENSG00000171056.7_3	protein_coding	ENST00000304501.1
MSTRG.93125.4	CCL19	0.933359	0.933359	trans	0	0	0.009938	0	0	11.3823	10.3405	24.2382	0	53.3567	0	19.86	13.29	2.44e-10	1.15e-07	yes	up	NovelLncRNA	ENST00000641136.1	MSTRG.93125	-	IGHG3	lncRNA	2.99616	1.18888	4.85438	1.79938	5.56248	55.4859	9.2948	35.1102	17.5561	118.637	3.28	47.22	3.85	3.26e-41	5.57e-38	yes	up	protein_coding	CCL19-201	ENSG00000172724.11_3	protein_coding	ENST00000311925.6
MSTRG.314097.1	JUN	0.933223	0.933223	trans	4.65898	9.93307	9.31098	13.7654	5.81568	2.31171	5.05202	5.53953	4.65257	3.30734	8.7	4.17	-1.06	9.47e-05	0.0176488	yes	down	NovelLncRNA	ENST00000399959.6	MSTRG.314097	-	DDX3X	lncRNA	51.9671	70.9779	93.2755	168.904	51.8318	27.6806	33.1819	66.0731	37.0578	21.3181	87.39	37.06	-1.24	2.1e-41	3.59e-38	yes	down	protein_coding	JUN-201	ENSG00000177606.6_3	protein_coding	ENST00000371222.3
ENST00000499098.1	ARHGAP18	0.932767	0.932767	trans	5.63234	7.51309	6.38303	9.98209	9.41123	1.83162	0.633777	3.68248	3.07844	1.3284	7.78	2.11	-1.88	4.99e-07	0.000154883	yes	down	antisense_RNA	AC096564.1-201	ENSG00000245293.2_4	antisense_RNA	AC096564.1	lncRNA	7.62118	13.9849	6.03967	14.5138	16.248	2.15664	2.74638	4.16004	5.60569	3.30098	11.68	3.59	-1.7	5.07e-09	2.09e-06	yes	down	protein_coding	ARHGAP18-201	ENSG00000146376.10_3	protein_coding	ENST00000368149.2
ENST00000499098.1	ANKS1A	0.932734	0.932734	trans	5.63234	7.51309	6.38303	9.98209	9.41123	1.83162	0.633777	3.68248	3.07844	1.3284	7.78	2.11	-1.88	4.99e-07	0.000154883	yes	down	antisense_RNA	AC096564.1-201	ENSG00000245293.2_4	antisense_RNA	AC096564.1	lncRNA	5.94562	5.08373	5.02697	8.07691	7.92472	1.86915	1.94669	3.14377	1.36198	2.83237	6.41	2.23	-1.52	4.4e-05	0.00908251	yes	down	protein_coding	ANKS1A-201	ENSG00000064999.13_3	protein_coding	ENST00000360359.4
MSTRG.147003.1	CHIT1	0.932694	0.932694	trans	0	1.91349	1.14357	0.503937	1.99392	0	0.603281	87.6206	32.7059	1.6726	1.11	24.52	4.46	1.09e-24	1.17e-21	yes	up	NovelLncRNA	ENST00000519937.6	MSTRG.147003	-	SFTPB	lncRNA	0	0	0.599788	0	0	0	0.494569	29.2367	0	0	0.12	5.95	5.63	1.11e-07	3.87e-05	yes	up	protein_coding	CHIT1-201	ENSG00000133063.15_3	protein_coding	ENST00000255427.7
ENST00000499098.1	NKD1	0.932442	0.932442	trans	5.63234	7.51309	6.38303	9.98209	9.41123	1.83162	0.633777	3.68248	3.07844	1.3284	7.78	2.11	-1.88	4.99e-07	0.000154883	yes	down	antisense_RNA	AC096564.1-201	ENSG00000245293.2_4	antisense_RNA	AC096564.1	lncRNA	3.67829	4.08464	6.05193	8.12622	5.05443	0.745426	0.27761	2.22323	2.26009	0.342297	5.4	1.17	-2.21	6.1e-06	0.00155909	yes	down	protein_coding	NKD1-201	ENSG00000140807.6_3	protein_coding	ENST00000268459.5
ENST00000602711.1	IDO1	0.932013	0.932013	trans	4.00317	4.84342	8.63375	2.49243	9.53212	18.1752	11.8053	24.306	7.31206	35.5636	5.9	19.43	1.72	1.54e-06	0.000439593	yes	up	sense_intronic	AC025857.2-201	ENSG00000269899.1_4	sense_intronic	AC025857.2	lncRNA	0.542721	0	0.496255	1.24727	4.67477	11.7678	1.46125	8.19549	2.3467	19.866	1.39	8.73	2.65	3.3e-06	0.000883772	yes	up	protein_coding	IDO1-202	ENSG00000131203.12_3	protein_coding	ENST00000518237.5
MSTRG.93124.1	HIST1H2AD	0.93196	0.93196	trans	0	0	0.049056	0	0.624409	37.3412	42.7296	22.7203	0.072424	295.269	0.13	79.63	9.21	3.81e-69	1.04e-65	yes	up	NovelLncRNA	ENST00000641978.1	MSTRG.93124	-	IGHG4	lncRNA	1.19154	2.26493	3.50138	5.74709	5.05651	13.3259	3.01672	10.7333	8.3815	33.5281	3.55	13.8	1.96	4.66e-06	0.00121616	yes	up	protein_coding	HIST1H2AD-201	ENSG00000196866.2_3	protein_coding	ENST00000341023.1
MSTRG.93125.4	PTGDS	0.931797	0.931797	trans	0	0	0.009938	0	0	11.3823	10.3405	24.2382	0	53.3567	0	19.86	13.29	2.44e-10	1.15e-07	yes	up	NovelLncRNA	ENST00000641136.1	MSTRG.93125	-	IGHG3	lncRNA	48.4797	37.8832	71.97	58.5343	30.1694	80.0104	54.6274	164.315	107.873	266.548	49.41	134.67	1.45	4.83e-26	5.47e-23	yes	up	protein_coding	PTGDS-202	ENSG00000107317.12_3	protein_coding	ENST00000371625.7
MSTRG.93125.6	ST6GAL1	0.931495	0.931495	trans	5.75836	8.58739	22.211	2.83516	2.01382	1264.25	1166.7	16.4888	36.6577	10.0191	8.28	498.82	5.91	0	0	yes	up	NovelLncRNA	ENST00000390548.6	MSTRG.93125	-	IGHG1	lncRNA	0	0	0	0	0.591481	9.28803	9.25943	1.77035	4.61144	0	0.12	4.99	5.4	1.33e-06	0.000385754	yes	up	protein_coding	ST6GAL1-211	ENSG00000073849.14_3	protein_coding	ENST00000448044.5
ENST00000555688.1	TSPAN7	0.931495	0.931495	trans	8.38361	7.81955	3.70913	9.41734	5.15456	2.55299	3.05767	3.24749	4.463	1.78727	6.9	3.02	-1.19	0.000210106	0.035155	yes	down	lincRNA	LINC00641-202	ENSG00000258441.1_2	processed_transcript	LINC00641	lncRNA	15.3273	15.4958	8.64061	15.0882	10.7582	4.25731	2.07886	6.08662	10.9674	1.43242	13.06	4.96	-1.4	2.64e-08	1e-05	yes	down	protein_coding	TSPAN7-202	ENSG00000156298.12_3	protein_coding	ENST00000378482.6
MSTRG.177254.3	TAGLN	0.931154	0.931154	trans	0	0.115079	0.130311	0	0.114651	6.95054	18.0096	0.337577	0.131657	0.82908	0.07	5.25	6.19	5.45e-07	0.000168047	yes	up	NovelLncRNA	ENST00000390297.3	MSTRG.177254	-	IGLV1-44	lncRNA	0.482336	0.321404	0.478603	0.336471	0.212504	0.689692	90.6664	0.630781	0.261555	0.250543	0.37	18.5	5.66	7.55e-21	7.26e-18	yes	up	protein_coding	TAGLN-206	ENSG00000149591.16_3	protein_coding	ENST00000530649.5
ENST00000602711.1	FBP1	0.931022	0.931022	trans	4.00317	4.84342	8.63375	2.49243	9.53212	18.1752	11.8053	24.306	7.31206	35.5636	5.9	19.43	1.72	1.54e-06	0.000439593	yes	up	sense_intronic	AC025857.2-201	ENSG00000269899.1_4	sense_intronic	AC025857.2	lncRNA	11.8942	15.1489	13.0945	7.234	10.7846	44.5476	26.3427	35.1405	7.47999	58.04	11.63	34.31	1.56	7.32e-09	2.98e-06	yes	up	protein_coding	FBP1-201	ENSG00000165140.9_3	protein_coding	ENST00000375326.8
MSTRG.177316.1	COL5A1	0.930934	0.930934	trans	2.48247	1.14692	5.21863	0.168674	0.607192	153.655	345.888	4.37876	0.887586	76.1135	1.92	116.18	5.92	1.47e-122	7.89e-119	yes	up	NovelLncRNA	ENST00000390325.2	MSTRG.177316	-	IGLC3	lncRNA	5.65802	2.24428	2.42971	7.45053	4.1958	33.8215	91.1735	27.2418	9.42621	46.7395	4.4	41.68	3.25	5e-31	6.63e-28	yes	up	protein_coding	COL5A1-201	ENSG00000130635.15_3	protein_coding	ENST00000371817.7
MSTRG.93125.4	TSPAN33	0.93091	0.93091	trans	0	0	0.009938	0	0	11.3823	10.3405	24.2382	0	53.3567	0	19.86	13.29	2.44e-10	1.15e-07	yes	up	NovelLncRNA	ENST00000641136.1	MSTRG.93125	-	IGHG3	lncRNA	0.92887	0.617296	0.804045	1.04723	1.10259	5.43017	3.73588	7.44161	1.92495	9.16463	0.9	5.54	2.62	0.000234243	0.0385368	yes	up	protein_coding	TSPAN33-201	ENSG00000158457.5_3	protein_coding	ENST00000486685.2
MSTRG.246995.1	ANKRD22	0.930307	0.930307	trans	0	0	2.55594	0	3.99632	6.06922	0	12.5767	1.35093	13.5371	1.31	6.71	2.36	0.000188021	0.0319724	yes	up	NovelLncRNA	ENST00000418931.6	MSTRG.246995	-	HLA-DPB1	lncRNA	0.894932	0.803465	0.775398	0.364184	2.07474	6.6386	1.41873	8.26822	2.20546	15.1777	0.98	6.74	2.78	2.37e-05	0.00532021	yes	up	protein_coding	ANKRD22-201	ENSG00000152766.5_3	protein_coding	ENST00000371930.4
MSTRG.93724.1	COL1A1	0.930174	0.930174	trans	0.023055	0.004473	0.006798	0.017749	0	3.27324	8.22979	0.350965	1.86885	1.34069	0.01	3.01	8.18	0.000306542	0.048384	yes	up	NovelLncRNA	ENST00000560830.1	MSTRG.93724	-	GREM1	lncRNA	35.4875	9.69302	28.1788	36.9251	17.8641	388.868	1493.32	418.459	265.666	602.078	25.63	633.68	4.63	0	0	yes	up	protein_coding	COL1A1-201	ENSG00000108821.13_3	protein_coding	ENST00000225964.9
MSTRG.177254.3	MZB1	0.930091	0.930091	trans	0	0.115079	0.130311	0	0.114651	6.95054	18.0096	0.337577	0.131657	0.82908	0.07	5.25	6.19	5.45e-07	0.000168047	yes	up	NovelLncRNA	ENST00000390297.3	MSTRG.177254	-	IGLV1-44	lncRNA	3.42634	3.12626	8.61241	2.32271	1.01369	75.9244	91.9763	8.30363	17.6211	8.44421	3.7	40.45	3.45	3.75e-32	5.18e-29	yes	up	protein_coding	MZB1-201	ENSG00000170476.15_3	protein_coding	ENST00000302125.8
MSTRG.93124.1	RPL27	0.930039	0.930039	trans	0	0	0.049056	0	0.624409	37.3412	42.7296	22.7203	0.072424	295.269	0.13	79.63	9.21	3.81e-69	1.04e-65	yes	up	NovelLncRNA	ENST00000641978.1	MSTRG.93124	-	IGHG4	lncRNA	2.66703	1.07046	3.29987	3.15394	10.8174	17.2662	3.79561	2.69254	14.6287	52.1492	4.2	18.11	2.11	2.15e-08	8.31e-06	yes	up	protein_coding	RPL27-201	ENSG00000131469.12_3	protein_coding	ENST00000253788.9
ENST00000446372.2	UBL3	0.929897	0.929897	trans	2.34231	6.2857	6.12061	7.52794	5.40091	0.589612	0.588399	1.48897	3.68316	0.16996	5.54	1.3	-2.09	8.24e-06	0.00204015	yes	down	lincRNA	SFTA1P-203	ENSG00000225383.7_3	lincRNA	SFTA1P	lncRNA	5.38115	9.83145	7.69962	11.9269	9.96404	2.70602	3.33612	4.9831	5.26622	4.69883	8.96	4.2	-1.09	5.52e-05	0.0110477	yes	down	protein_coding	UBL3-201	ENSG00000122042.9_3	protein_coding	ENST00000380680.4
MSTRG.93724.1	RPS7	0.929883	0.929883	trans	0.023055	0.004473	0.006798	0.017749	0	3.27324	8.22979	0.350965	1.86885	1.34069	0.01	3.01	8.18	0.000306542	0.048384	yes	up	NovelLncRNA	ENST00000560830.1	MSTRG.93724	-	GREM1	lncRNA	4.62809	7.23443	7.54342	3.12793	7.03442	10.8741	90.7307	5.1906	9.87615	22.9813	5.91	27.93	2.24	2.5e-13	1.54e-10	yes	up	protein_coding	RPS7-201	ENSG00000171863.12_3	protein_coding	ENST00000304921.9
MSTRG.101872.3	S100A8	0.908264	0.929219	trans	0.488915	79.1319	1.49197	0	0	0.000688	9.66925	7.11859	0	0	16.22	3.36	-2.27	1.89e-15	1.32e-12	yes	down	NovelLncRNA	ENST00000251595.10	MSTRG.101872	-	HBA2	lncRNA	19.9487	88.952	0	13.181	20.5504	18.0319	32.6357	3.07928	1.85692	7.6775	28.53	12.66	-1.17	7.71e-14	4.93e-11	yes	down	protein_coding	S100A8-202	ENSG00000143546.9_3	protein_coding	ENST00000368733.3
MSTRG.101872.3	S100A8	0.929219	0.929219	trans	0.488915	79.1319	1.49197	0	0	0.000688	9.66925	7.11859	0	0	16.22	3.36	-2.27	1.89e-15	1.32e-12	yes	down	NovelLncRNA	ENST00000251595.10	MSTRG.101872	-	HBA2	lncRNA	19.9487	88.952	0	13.181	20.5504	18.0319	32.6357	3.07928	1.85692	7.6775	28.53	12.66	-1.17	7.71e-14	4.93e-11	yes	down	protein_coding	S100A8-202	ENSG00000143546.9_3	protein_coding	ENST00000368733.3
MSTRG.93125.4	GPNMB	0.928946	0.928946	trans	0	0	0.009938	0	0	11.3823	10.3405	24.2382	0	53.3567	0	19.86	13.29	2.44e-10	1.15e-07	yes	up	NovelLncRNA	ENST00000641136.1	MSTRG.93125	-	IGHG3	lncRNA	1.17721	1.81711	14.0918	1.77587	4.93465	9.24218	17.3842	13.5882	6.38637	61.1759	4.76	21.56	2.18	3.27e-10	1.52e-07	yes	up	protein_coding	GPNMB-203	ENSG00000136235.15_3	protein_coding	ENST00000409458.3
MSTRG.93124.1	COL5A2	0.928823	0.928823	trans	0	0	0.049056	0	0.624409	37.3412	42.7296	22.7203	0.072424	295.269	0.13	79.63	9.21	3.81e-69	1.04e-65	yes	up	NovelLncRNA	ENST00000641978.1	MSTRG.93124	-	IGHG4	lncRNA	1.01747	0	7.0426	1.70832	0.017515	33.5623	6.94549	2.20277	2.30594	68.135	1.96	22.63	3.53	4.08e-19	3.57e-16	yes	up	protein_coding	COL5A2-201	ENSG00000204262.11_3	protein_coding	ENST00000374866.7
ENST00000620635.1	S1PR1	0.928588	0.928588	trans	9.31867	6.5365	3.05319	6.65603	2.68266	1.47872	1.98479	2.08795	2.49397	1.36736	5.65	1.88	-1.59	8.94e-05	0.0168151	yes	down	lincRNA	AC068870.2-201	ENSG00000277782.1_3	lincRNA	AC068870.2	lncRNA	58.2386	28.7149	21.4122	57.4383	21.1046	10.4291	8.21082	11.5861	18.0918	4.48932	37.38	10.56	-1.82	2.25e-27	2.66e-24	yes	down	protein_coding	S1PR1-201	ENSG00000170989.8_3	protein_coding	ENST00000305352.6
ENST00000555688.1	STC1	0.92822	0.92822	trans	8.38361	7.81955	3.70913	9.41734	5.15456	2.55299	3.05767	3.24749	4.463	1.78727	6.9	3.02	-1.19	0.000210106	0.035155	yes	down	lincRNA	LINC00641-202	ENSG00000258441.1_2	processed_transcript	LINC00641	lncRNA	12.1277	9.98099	0.995773	16.0923	2.05155	1.62488	1.96585	0.041221	0.614597	1.34796	8.25	1.12	-2.88	3.62e-10	1.67e-07	yes	down	protein_coding	STC1-201	ENSG00000159167.11_3	protein_coding	ENST00000290271.6
MSTRG.177254.3	RPS7	0.927622	0.927622	trans	0	0.115079	0.130311	0	0.114651	6.95054	18.0096	0.337577	0.131657	0.82908	0.07	5.25	6.19	5.45e-07	0.000168047	yes	up	NovelLncRNA	ENST00000390297.3	MSTRG.177254	-	IGLV1-44	lncRNA	4.62809	7.23443	7.54342	3.12793	7.03442	10.8741	90.7307	5.1906	9.87615	22.9813	5.91	27.93	2.24	2.5e-13	1.54e-10	yes	up	protein_coding	RPS7-201	ENSG00000171863.12_3	protein_coding	ENST00000304921.9
ENST00000429730.1	HIST1H2BL	0.927544	0.927544	trans	0.009558	0.137477	1.30742	0.496152	0.659683	2.83388	1.97939	3.91676	1.80286	14.2103	0.52	4.95	3.24	6.58e-05	0.0128349	yes	up	lincRNA	LINC01857-201	ENSG00000224137.1_2	lincRNA	LINC01857	lncRNA	0.373086	0.574942	0.727867	1.22835	1.15793	5.92329	4.14147	2.87702	3.39356	11.5453	0.81	5.58	2.78	0.000120871	0.0218246	yes	up	protein_coding	HIST1H2BL-201	ENSG00000185130.5_3	protein_coding	ENST00000377401.3
ENST00000563635.5	UBL3	0.92754	0.92754	trans	10.9089	23.6852	23.369	24.6353	21.4244	4.04301	1.77789	11.762	7.08141	3.94093	20.8	5.72	-1.86	3e-16	2.19e-13	yes	down	processed_transcript	AL137782.1-201	ENSG00000261553.5_4	processed_transcript	AL137782.1	lncRNA	5.38115	9.83145	7.69962	11.9269	9.96404	2.70602	3.33612	4.9831	5.26622	4.69883	8.96	4.2	-1.09	5.52e-05	0.0110477	yes	down	protein_coding	UBL3-201	ENSG00000122042.9_3	protein_coding	ENST00000380680.4
MSTRG.177316.1	MZB1	0.92752	0.92752	trans	2.48247	1.14692	5.21863	0.168674	0.607192	153.655	345.888	4.37876	0.887586	76.1135	1.92	116.18	5.92	1.47e-122	7.89e-119	yes	up	NovelLncRNA	ENST00000390325.2	MSTRG.177316	-	IGLC3	lncRNA	3.42634	3.12626	8.61241	2.32271	1.01369	75.9244	91.9763	8.30363	17.6211	8.44421	3.7	40.45	3.45	3.75e-32	5.18e-29	yes	up	protein_coding	MZB1-201	ENSG00000170476.15_3	protein_coding	ENST00000302125.8
MSTRG.93125.4	LGALS2	0.927223	0.927223	trans	0	0	0.009938	0	0	11.3823	10.3405	24.2382	0	53.3567	0	19.86	13.29	2.44e-10	1.15e-07	yes	up	NovelLncRNA	ENST00000641136.1	MSTRG.93125	-	IGHG3	lncRNA	0.1007	0.162428	0.102912	0.357007	0.496535	8.70106	0.261114	3.95227	0.582537	34.6787	0.24	9.64	5.3	2.03e-11	1.06e-08	yes	up	protein_coding	LGALS2-201	ENSG00000100079.6_3	protein_coding	ENST00000215886.5
MSTRG.41926.9	PREX2	0.927144	0.927144	trans	9.33504	11.1079	5.11575	9.84899	8.73034	2.91356	1.08113	3.44851	4.45224	0.488951	8.83	2.48	-1.83	1.28e-07	4.4e-05	yes	down	NovelLncRNA	ENST00000227756.4	MSTRG.41926	-	GALNT18	lncRNA	3.525	4.04617	2.13262	5.81384	4.87231	0.297605	0.524533	1.68731	1.78198	0	4.08	0.86	-2.25	7.32e-05	0.0140757	yes	down	protein_coding	PREX2-201	ENSG00000046889.18_3	protein_coding	ENST00000288368.4
MSTRG.93125.4	FILIP1L	0.927105	0.927105	trans	0	0	0.009938	0	0	11.3823	10.3405	24.2382	0	53.3567	0	19.86	13.29	2.44e-10	1.15e-07	yes	up	NovelLncRNA	ENST00000641136.1	MSTRG.93125	-	IGHG3	lncRNA	0.658197	0.956146	4.40068	2.38471	1.30629	11.7422	2.67494	17.7343	2.01731	22.6444	1.94	11.36	2.55	2.43e-07	8.04e-05	yes	up	protein_coding	FILIP1L-203	ENSG00000168386.18_3	protein_coding	ENST00000383694.3
MSTRG.93124.1	TXN	0.927041	0.927041	trans	0	0	0.049056	0	0.624409	37.3412	42.7296	22.7203	0.072424	295.269	0.13	79.63	9.21	3.81e-69	1.04e-65	yes	up	NovelLncRNA	ENST00000641978.1	MSTRG.93124	-	IGHG4	lncRNA	17.8316	38.762	12.9926	21.9642	18.503	30.9044	50.2541	50.2597	20.6857	107.473	22.01	51.92	1.24	4.82e-08	1.77e-05	yes	up	protein_coding	TXN-202	ENSG00000136810.12_3	protein_coding	ENST00000374517.5
MSTRG.93124.1	HLA-A	0.926932	0.926932	trans	0	0	0.049056	0	0.624409	37.3412	42.7296	22.7203	0.072424	295.269	0.13	79.63	9.21	3.81e-69	1.04e-65	yes	up	NovelLncRNA	ENST00000641978.1	MSTRG.93124	-	IGHG4	lncRNA	0.001696	0.009531	0.005524	0.398006	0.449959	12.4656	0.005935	0.018193	0.028602	26.792	0.17	7.86	5.51	1.14e-09	5.08e-07	yes	up	protein_coding	HLA-A-204	ENSG00000206503.12_3	protein_coding	ENST00000396634.5
MSTRG.93724.1	RCN3	0.926582	0.926582	trans	0.023055	0.004473	0.006798	0.017749	0	3.27324	8.22979	0.350965	1.86885	1.34069	0.01	3.01	8.18	0.000306542	0.048384	yes	up	NovelLncRNA	ENST00000560830.1	MSTRG.93724	-	GREM1	lncRNA	0.886022	0.251838	1.0409	0.912418	0.157686	1.03569	18.3801	0.892366	3.55291	0.954226	0.65	4.96	2.93	0.000170743	0.029505	yes	up	protein_coding	RCN3-201	ENSG00000142552.7_3	protein_coding	ENST00000270645.7
ENST00000429730.1	PPA1	0.926571	0.926571	trans	0.009558	0.137477	1.30742	0.496152	0.659683	2.83388	1.97939	3.91676	1.80286	14.2103	0.52	4.95	3.24	6.58e-05	0.0128349	yes	up	lincRNA	LINC01857-201	ENSG00000224137.1_2	lincRNA	LINC01857	lncRNA	8.52785	13.3214	7.47721	12.62	1.45215	18.8469	17.8069	15.1626	8.19252	45.5028	8.68	21.1	1.28	0.000282962	0.0452956	yes	up	protein_coding	PPA1-202	ENSG00000180817.11_3	protein_coding	ENST00000373232.7
ENST00000446372.2	NKD1	0.926536	0.926536	trans	2.34231	6.2857	6.12061	7.52794	5.40091	0.589612	0.588399	1.48897	3.68316	0.16996	5.54	1.3	-2.09	8.24e-06	0.00204015	yes	down	lincRNA	SFTA1P-203	ENSG00000225383.7_3	lincRNA	SFTA1P	lncRNA	3.67829	4.08464	6.05193	8.12622	5.05443	0.745426	0.27761	2.22323	2.26009	0.342297	5.4	1.17	-2.21	6.1e-06	0.00155909	yes	down	protein_coding	NKD1-201	ENSG00000140807.6_3	protein_coding	ENST00000268459.5
MSTRG.177316.1	RPS7	0.926258	0.926258	trans	2.48247	1.14692	5.21863	0.168674	0.607192	153.655	345.888	4.37876	0.887586	76.1135	1.92	116.18	5.92	1.47e-122	7.89e-119	yes	up	NovelLncRNA	ENST00000390325.2	MSTRG.177316	-	IGLC3	lncRNA	4.62809	7.23443	7.54342	3.12793	7.03442	10.8741	90.7307	5.1906	9.87615	22.9813	5.91	27.93	2.24	2.5e-13	1.54e-10	yes	up	protein_coding	RPS7-201	ENSG00000171863.12_3	protein_coding	ENST00000304921.9
MSTRG.177316.1	CCL18	0.926191	0.926191	trans	2.48247	1.14692	5.21863	0.168674	0.607192	153.655	345.888	4.37876	0.887586	76.1135	1.92	116.18	5.92	1.47e-122	7.89e-119	yes	up	NovelLncRNA	ENST00000390325.2	MSTRG.177316	-	IGLC3	lncRNA	6.955	1.81873	5.99608	2.19566	19.8413	126.671	176.414	50.0475	2.45198	10.2125	7.36	73.16	3.31	2.28e-54	5.09e-51	yes	up	protein_coding	CCL18-201	ENSG00000275385.1_3	protein_coding	ENST00000616054.1
ENST00000429730.1	RGS10	0.926046	0.926046	trans	0.009558	0.137477	1.30742	0.496152	0.659683	2.83388	1.97939	3.91676	1.80286	14.2103	0.52	4.95	3.24	6.58e-05	0.0128349	yes	up	lincRNA	LINC01857-201	ENSG00000224137.1_2	lincRNA	LINC01857	lncRNA	2.42039	2.62401	3.06164	0	3.87691	4.65585	5.81766	10.6295	7.9777	18.5444	2.4	9.53	1.99	0.000111911	0.0204601	yes	up	protein_coding	RGS10-202	ENSG00000148908.14_3	protein_coding	ENST00000369103.2
ENST00000429730.1	RGS10	0.959287	0.926046	trans	0.009558	0.137477	1.30742	0.496152	0.659683	2.83388	1.97939	3.91676	1.80286	14.2103	0.52	4.95	3.24	6.58e-05	0.0128349	yes	up	lincRNA	LINC01857-201	ENSG00000224137.1_2	lincRNA	LINC01857	lncRNA	2.42039	2.62401	3.06164	0	3.87691	4.65585	5.81766	10.6295	7.9777	18.5444	2.4	9.53	1.99	0.000111911	0.0204601	yes	up	protein_coding	RGS10-202	ENSG00000148908.14_3	protein_coding	ENST00000369103.2
ENST00000456363.1	NKD1	0.925787	0.925787	trans	17.8198	24.6725	35.0572	40.9557	32.1116	2.57261	1.99956	12.9551	28.5294	4.56757	30.12	10.12	-1.57	2.08e-19	1.84e-16	yes	down	antisense_RNA	AC093110.1-201	ENSG00000238018.2_3	antisense_RNA	AC093110.1	lncRNA	3.67829	4.08464	6.05193	8.12622	5.05443	0.745426	0.27761	2.22323	2.26009	0.342297	5.4	1.17	-2.21	6.1e-06	0.00155909	yes	down	protein_coding	NKD1-201	ENSG00000140807.6_3	protein_coding	ENST00000268459.5
MSTRG.93724.1	MZB1	0.925156	0.925156	trans	0.023055	0.004473	0.006798	0.017749	0	3.27324	8.22979	0.350965	1.86885	1.34069	0.01	3.01	8.18	0.000306542	0.048384	yes	up	NovelLncRNA	ENST00000560830.1	MSTRG.93724	-	GREM1	lncRNA	3.42634	3.12626	8.61241	2.32271	1.01369	75.9244	91.9763	8.30363	17.6211	8.44421	3.7	40.45	3.45	3.75e-32	5.18e-29	yes	up	protein_coding	MZB1-201	ENSG00000170476.15_3	protein_coding	ENST00000302125.8
MSTRG.147003.1	RPS15A	0.925091	0.925091	trans	0	1.91349	1.14357	0.503937	1.99392	0	0.603281	87.6206	32.7059	1.6726	1.11	24.52	4.46	1.09e-24	1.17e-21	yes	up	NovelLncRNA	ENST00000519937.6	MSTRG.147003	-	SFTPB	lncRNA	0.071588	0.243128	0.074478	0.558045	0.072004	2.87914	0.074497	32.0701	0.084454	0.385511	0.2	7.1	5.12	1.07e-08	4.26e-06	yes	up	protein_coding	RPS15A-205	ENSG00000134419.15_3	protein_coding	ENST00000565420.5
ENST00000429730.1	HIST1H4K	0.924984	0.924984	trans	0.009558	0.137477	1.30742	0.496152	0.659683	2.83388	1.97939	3.91676	1.80286	14.2103	0.52	4.95	3.24	6.58e-05	0.0128349	yes	up	lincRNA	LINC01857-201	ENSG00000224137.1_2	lincRNA	LINC01857	lncRNA	5.42752	6.96734	10.201	11.2196	12.5709	25.4969	31.3403	27.457	12.6499	56.994	9.28	30.79	1.73	1.14e-09	5.06e-07	yes	up	protein_coding	HIST1H4K-201	ENSG00000273542.1_2	protein_coding	ENST00000611927.1
ENST00000429730.1	NCF1	0.924959	0.924959	trans	0.009558	0.137477	1.30742	0.496152	0.659683	2.83388	1.97939	3.91676	1.80286	14.2103	0.52	4.95	3.24	6.58e-05	0.0128349	yes	up	lincRNA	LINC01857-201	ENSG00000224137.1_2	lincRNA	LINC01857	lncRNA	3.34378	9.50779	2.38114	4.23408	7.80864	16.0739	12.528	24.6538	5.66981	40.6231	5.46	19.91	1.87	1.37e-07	4.71e-05	yes	up	protein_coding	NCF1-201	ENSG00000158517.13_3	protein_coding	ENST00000289473.8
ENST00000429730.1	RPS24	0.924621	0.924621	trans	0.009558	0.137477	1.30742	0.496152	0.659683	2.83388	1.97939	3.91676	1.80286	14.2103	0.52	4.95	3.24	6.58e-05	0.0128349	yes	up	lincRNA	LINC01857-201	ENSG00000224137.1_2	lincRNA	LINC01857	lncRNA	1.18636	3.06555	0.457752	0	1.48199	37.6633	4.6515	3.09274	7.74152	83.475	1.24	27.32	4.46	2.52e-27	2.96e-24	yes	up	protein_coding	RPS24-202	ENSG00000138326.18_3	protein_coding	ENST00000372360.7
MSTRG.147003.1	GPRC5A	0.924465	0.924465	trans	0	1.91349	1.14357	0.503937	1.99392	0	0.603281	87.6206	32.7059	1.6726	1.11	24.52	4.46	1.09e-24	1.17e-21	yes	up	NovelLncRNA	ENST00000519937.6	MSTRG.147003	-	SFTPB	lncRNA	0.116334	3.47157	0.13202	0.444912	2.89612	1.56806	0.692383	19.42	6.31067	7.6008	1.41	7.12	2.33	0.000133929	0.0238988	yes	up	protein_coding	GPRC5A-201	ENSG00000013588.7_3	protein_coding	ENST00000014914.5
ENST00000589379.1	MAMDC2	0.924438	0.924438	trans	3.64998	2.721	2.25397	4.61814	4.11195	0.77509	0.121553	1.69942	0.766779	0.139955	3.47	0.7	-2.31	0.000212687	0.0354741	yes	down	antisense_RNA	AC011511.5-201	ENSG00000267607.1_3	antisense_RNA	AC011511.5	lncRNA	12.0164	13.4333	10.2517	20.3471	11.623	0.729145	0.148974	5.35653	6.43966	0.321451	13.53	2.6	-2.38	1.22e-13	7.68e-11	yes	down	protein_coding	MAMDC2-201	ENSG00000165072.9_3	protein_coding	ENST00000377182.4
MSTRG.41926.9	RND1	0.924385	0.924385	trans	9.33504	11.1079	5.11575	9.84899	8.73034	2.91356	1.08113	3.44851	4.45224	0.488951	8.83	2.48	-1.83	1.28e-07	4.4e-05	yes	down	NovelLncRNA	ENST00000227756.4	MSTRG.41926	-	GALNT18	lncRNA	4.77178	8.52076	2.22654	8.6289	8.7649	1.98284	0.452642	0.998589	2.96711	0.615709	6.58	1.4	-2.23	5.2e-07	0.000160778	yes	down	protein_coding	RND1-201	ENSG00000172602.9_3	protein_coding	ENST00000309739.5
MSTRG.85501.1	MMP1	0.924189	0.924189	trans	0	0	0	0	0	0	43.9449	0	0	0	0	8.79	9.78	9.64e-11	4.75e-08	yes	up	NovelLncRNA	ENST00000635274.1	MSTRG.85501	-	AL139099.5	lncRNA	0.06227	0.133342	0	0.293988	0.029663	96.9852	252.62	2.81702	1.03636	36.8914	0.1	78.07	9.55	4.75e-65	1.25e-61	yes	up	protein_coding	MMP1-201	ENSG00000196611.4_3	protein_coding	ENST00000315274.6
ENST00000602711.1	SPP1	0.923735	0.923735	trans	4.00317	4.84342	8.63375	2.49243	9.53212	18.1752	11.8053	24.306	7.31206	35.5636	5.9	19.43	1.72	1.54e-06	0.000439593	yes	up	sense_intronic	AC025857.2-201	ENSG00000269899.1_4	sense_intronic	AC025857.2	lncRNA	0	0	0	0	0	26.7356	40.4948	42.2382	0	71.6467	0	36.22	11.82	6.64e-35	9.72e-32	yes	up	protein_coding	SPP1-202	ENSG00000118785.13_3	protein_coding	ENST00000360804.4
ENST00000429730.1	RPL27	0.923648	0.923648	trans	0.009558	0.137477	1.30742	0.496152	0.659683	2.83388	1.97939	3.91676	1.80286	14.2103	0.52	4.95	3.24	6.58e-05	0.0128349	yes	up	lincRNA	LINC01857-201	ENSG00000224137.1_2	lincRNA	LINC01857	lncRNA	2.66703	1.07046	3.29987	3.15394	10.8174	17.2662	3.79561	2.69254	14.6287	52.1492	4.2	18.11	2.11	2.15e-08	8.31e-06	yes	up	protein_coding	RPL27-201	ENSG00000131469.12_3	protein_coding	ENST00000253788.9
ENST00000602711.1	CCL19	0.923618	0.923618	trans	4.00317	4.84342	8.63375	2.49243	9.53212	18.1752	11.8053	24.306	7.31206	35.5636	5.9	19.43	1.72	1.54e-06	0.000439593	yes	up	sense_intronic	AC025857.2-201	ENSG00000269899.1_4	sense_intronic	AC025857.2	lncRNA	2.99616	1.18888	4.85438	1.79938	5.56248	55.4859	9.2948	35.1102	17.5561	118.637	3.28	47.22	3.85	3.26e-41	5.57e-38	yes	up	protein_coding	CCL19-201	ENSG00000172724.11_3	protein_coding	ENST00000311925.6
MSTRG.93125.4	RGS10	0.92333	0.92333	trans	0	0	0.009938	0	0	11.3823	10.3405	24.2382	0	53.3567	0	19.86	13.29	2.44e-10	1.15e-07	yes	up	NovelLncRNA	ENST00000641136.1	MSTRG.93125	-	IGHG3	lncRNA	2.42039	2.62401	3.06164	0	3.87691	4.65585	5.81766	10.6295	7.9777	18.5444	2.4	9.53	1.99	0.000111911	0.0204601	yes	up	protein_coding	RGS10-202	ENSG00000148908.14_3	protein_coding	ENST00000369103.2
MSTRG.93125.4	RGS10	0.9036	0.92333	trans	0	0	0.009938	0	0	11.3823	10.3405	24.2382	0	53.3567	0	19.86	13.29	2.44e-10	1.15e-07	yes	up	NovelLncRNA	ENST00000641136.1	MSTRG.93125	-	IGHG3	lncRNA	2.42039	2.62401	3.06164	0	3.87691	4.65585	5.81766	10.6295	7.9777	18.5444	2.4	9.53	1.99	0.000111911	0.0204601	yes	up	protein_coding	RGS10-202	ENSG00000148908.14_3	protein_coding	ENST00000369103.2
ENST00000602711.1	HIST1H4K	0.923327	0.923327	trans	4.00317	4.84342	8.63375	2.49243	9.53212	18.1752	11.8053	24.306	7.31206	35.5636	5.9	19.43	1.72	1.54e-06	0.000439593	yes	up	sense_intronic	AC025857.2-201	ENSG00000269899.1_4	sense_intronic	AC025857.2	lncRNA	5.42752	6.96734	10.201	11.2196	12.5709	25.4969	31.3403	27.457	12.6499	56.994	9.28	30.79	1.73	1.14e-09	5.06e-07	yes	up	protein_coding	HIST1H4K-201	ENSG00000273542.1_2	protein_coding	ENST00000611927.1
MSTRG.213352.17	CCL2	0.923278	0.923278	trans	2.89851	6.95165	0.56411	4.71523	3.84999	0.482734	0.798633	0.95244	1.87166	0.613678	3.8	0.94	-2.01	0.000289578	0.0460805	yes	down	NovelLncRNA	ENST00000394684.8	MSTRG.213352	-	SGMS2	lncRNA	24.0416	51.4149	8.46965	24.0714	19.0517	3.00286	4.86337	7.1661	24.438	0.670593	25.41	8.03	-1.66	1.61e-17	1.3e-14	yes	down	protein_coding	CCL2-202	ENSG00000108691.9_3	protein_coding	ENST00000580907.5
MSTRG.93125.4	HIST1H2AD	0.923011	0.923011	trans	0	0	0.009938	0	0	11.3823	10.3405	24.2382	0	53.3567	0	19.86	13.29	2.44e-10	1.15e-07	yes	up	NovelLncRNA	ENST00000641136.1	MSTRG.93125	-	IGHG3	lncRNA	1.19154	2.26493	3.50138	5.74709	5.05651	13.3259	3.01672	10.7333	8.3815	33.5281	3.55	13.8	1.96	4.66e-06	0.00121616	yes	up	protein_coding	HIST1H2AD-201	ENSG00000196866.2_3	protein_coding	ENST00000341023.1
MSTRG.93124.1	CCL19	0.922927	0.922927	trans	0	0	0.049056	0	0.624409	37.3412	42.7296	22.7203	0.072424	295.269	0.13	79.63	9.21	3.81e-69	1.04e-65	yes	up	NovelLncRNA	ENST00000641978.1	MSTRG.93124	-	IGHG4	lncRNA	2.99616	1.18888	4.85438	1.79938	5.56248	55.4859	9.2948	35.1102	17.5561	118.637	3.28	47.22	3.85	3.26e-41	5.57e-38	yes	up	protein_coding	CCL19-201	ENSG00000172724.11_3	protein_coding	ENST00000311925.6
MSTRG.93125.4	CCR5	0.922784	0.922784	trans	0	0	0.009938	0	0	11.3823	10.3405	24.2382	0	53.3567	0	19.86	13.29	2.44e-10	1.15e-07	yes	up	NovelLncRNA	ENST00000641136.1	MSTRG.93125	-	IGHG3	lncRNA	0	0.028263	0.91306	0.541177	2.17223	4.1468	3.05796	2.74289	3.05029	14.1883	0.73	5.44	2.9	9.58e-05	0.0178297	yes	up	protein_coding	CCR5-201	ENSG00000160791.13_3	protein_coding	ENST00000292303.4
ENST00000602711.1	HIST1H4J	0.922759	0.922759	trans	4.00317	4.84342	8.63375	2.49243	9.53212	18.1752	11.8053	24.306	7.31206	35.5636	5.9	19.43	1.72	1.54e-06	0.000439593	yes	up	sense_intronic	AC025857.2-201	ENSG00000269899.1_4	sense_intronic	AC025857.2	lncRNA	4.59952	5.97521	7.99272	7.24263	10.5017	21.1026	26.2517	21.9979	8.67386	44.8489	7.26	24.57	1.76	3.27e-08	1.23e-05	yes	up	protein_coding	HIST1H4J-201	ENSG00000197238.4_3	protein_coding	ENST00000355057.2
ENST00000602711.1	HLA-DRA	0.922511	0.922511	trans	4.00317	4.84342	8.63375	2.49243	9.53212	18.1752	11.8053	24.306	7.31206	35.5636	5.9	19.43	1.72	1.54e-06	0.000439593	yes	up	sense_intronic	AC025857.2-201	ENSG00000269899.1_4	sense_intronic	AC025857.2	lncRNA	169.646	357.152	405.436	233.762	505.967	460.675	601.141	883.124	624.753	1590.93	334.39	832.13	1.32	1.7e-122	9e-119	yes	up	protein_coding	HLA-DRA-202	ENSG00000204287.13_3	protein_coding	ENST00000395388.6
ENST00000624935.3	FDCSP	0.922389	0.922389	trans	0	0	0	0	0	21.9043	0	0	0	1.54592	0	4.69	8.88	2.52e-06	0.000689538	yes	up	processed_transcript	AC244205.1-201	ENSG00000240040.6_4	processed_transcript	AC244205.1	lncRNA	0	0.155599	0.172723	0	0.600927	33.7914	3.65445	3.16854	10.0537	13.0794	0.19	12.75	6.1	5.93e-15	4.04e-12	yes	up	protein_coding	FDCSP-201	ENSG00000181617.5_3	protein_coding	ENST00000317987.5
MSTRG.101872.3	S100A12	0.921799	0.921799	trans	0.488915	79.1319	1.49197	0	0	0.000688	9.66925	7.11859	0	0	16.22	3.36	-2.27	1.89e-15	1.32e-12	yes	down	NovelLncRNA	ENST00000251595.10	MSTRG.101872	-	HBA2	lncRNA	3.2008	10.7551	0.062909	2.39712	2.0676	1.8175	1.69208	0.109585	0.564001	0.25347	3.7	0.89	-2.06	0.000293749	0.0466807	yes	down	protein_coding	S100A12-201	ENSG00000163221.8_3	protein_coding	ENST00000368737.4
MSTRG.93125.4	PPA1	0.92169	0.92169	trans	0	0	0.009938	0	0	11.3823	10.3405	24.2382	0	53.3567	0	19.86	13.29	2.44e-10	1.15e-07	yes	up	NovelLncRNA	ENST00000641136.1	MSTRG.93125	-	IGHG3	lncRNA	8.52785	13.3214	7.47721	12.62	1.45215	18.8469	17.8069	15.1626	8.19252	45.5028	8.68	21.1	1.28	0.000282962	0.0452956	yes	up	protein_coding	PPA1-202	ENSG00000180817.11_3	protein_coding	ENST00000373232.7
MSTRG.85501.1	TDO2	0.921401	0.921401	trans	0	0	0	0	0	0	43.9449	0	0	0	0	8.79	9.78	9.64e-11	4.75e-08	yes	up	NovelLncRNA	ENST00000635274.1	MSTRG.85501	-	AL139099.5	lncRNA	0	0	0	0	0.350489	1.211	8.69934	1.45498	0.675204	3.37926	0.07	3.08	5.46	0.000139685	0.0247868	yes	up	protein_coding	TDO2-208	ENSG00000151790.8_3	protein_coding	ENST00000536354.2
MSTRG.93724.1	PRDX4	0.921215	0.921215	trans	0.023055	0.004473	0.006798	0.017749	0	3.27324	8.22979	0.350965	1.86885	1.34069	0.01	3.01	8.18	0.000306542	0.048384	yes	up	NovelLncRNA	ENST00000560830.1	MSTRG.93724	-	GREM1	lncRNA	3.4178	3.97619	4.44225	6.04796	4.47088	21.1935	35.053	6.04199	0.141177	11.7621	4.47	14.84	1.73	2.37e-05	0.00531679	yes	up	protein_coding	PRDX4-202	ENSG00000123131.12_3	protein_coding	ENST00000379341.8
MSTRG.213352.17	CXCR2	0.921026	0.921026	trans	2.89851	6.95165	0.56411	4.71523	3.84999	0.482734	0.798633	0.95244	1.87166	0.613678	3.8	0.94	-2.01	0.000289578	0.0460805	yes	down	NovelLncRNA	ENST00000394684.8	MSTRG.213352	-	SGMS2	lncRNA	5.02305	10.9128	0	6.38102	5.46047	2.05783	3.45762	0	0.220219	0	5.56	1.15	-2.28	3.25e-06	0.000870539	yes	down	protein_coding	CXCR2-201	ENSG00000180871.7_3	protein_coding	ENST00000318507.6
MSTRG.177316.1	COL1A1	0.920927	0.920927	trans	2.48247	1.14692	5.21863	0.168674	0.607192	153.655	345.888	4.37876	0.887586	76.1135	1.92	116.18	5.92	1.47e-122	7.89e-119	yes	up	NovelLncRNA	ENST00000390325.2	MSTRG.177316	-	IGLC3	lncRNA	35.4875	9.69302	28.1788	36.9251	17.8641	388.868	1493.32	418.459	265.666	602.078	25.63	633.68	4.63	0	0	yes	up	protein_coding	COL1A1-201	ENSG00000108821.13_3	protein_coding	ENST00000225964.9
ENST00000555688.1	ADRB1	0.92022	0.92022	trans	8.38361	7.81955	3.70913	9.41734	5.15456	2.55299	3.05767	3.24749	4.463	1.78727	6.9	3.02	-1.19	0.000210106	0.035155	yes	down	lincRNA	LINC00641-202	ENSG00000258441.1_2	processed_transcript	LINC00641	lncRNA	10.3743	6.52475	2.5301	9.37039	0.05399	0.209117	0.007503	1.31144	1.63083	0.12714	5.77	0.66	-3.13	6.41e-08	2.31e-05	yes	down	protein_coding	ADRB1-201	ENSG00000043591.5_3	protein_coding	ENST00000369295.3
MSTRG.93724.1	CREB3L2	0.920093	0.920093	trans	0.023055	0.004473	0.006798	0.017749	0	3.27324	8.22979	0.350965	1.86885	1.34069	0.01	3.01	8.18	0.000306542	0.048384	yes	up	NovelLncRNA	ENST00000560830.1	MSTRG.93724	-	GREM1	lncRNA	0.658279	0.973158	1.12619	1.76427	1.19974	1.99946	29.5811	0.7541	1.75362	1.28234	1.14	7.07	2.63	3.12e-05	0.00676701	yes	up	protein_coding	CREB3L2-201	ENSG00000182158.14_3	protein_coding	ENST00000330387.10
ENST00000563635.5	NKD1	0.919929	0.919929	trans	10.9089	23.6852	23.369	24.6353	21.4244	4.04301	1.77789	11.762	7.08141	3.94093	20.8	5.72	-1.86	3e-16	2.19e-13	yes	down	processed_transcript	AL137782.1-201	ENSG00000261553.5_4	processed_transcript	AL137782.1	lncRNA	3.67829	4.08464	6.05193	8.12622	5.05443	0.745426	0.27761	2.22323	2.26009	0.342297	5.4	1.17	-2.21	6.1e-06	0.00155909	yes	down	protein_coding	NKD1-201	ENSG00000140807.6_3	protein_coding	ENST00000268459.5
ENST00000429730.1	TXN	0.919706	0.919706	trans	0.009558	0.137477	1.30742	0.496152	0.659683	2.83388	1.97939	3.91676	1.80286	14.2103	0.52	4.95	3.24	6.58e-05	0.0128349	yes	up	lincRNA	LINC01857-201	ENSG00000224137.1_2	lincRNA	LINC01857	lncRNA	17.8316	38.762	12.9926	21.9642	18.503	30.9044	50.2541	50.2597	20.6857	107.473	22.01	51.92	1.24	4.82e-08	1.77e-05	yes	up	protein_coding	TXN-202	ENSG00000136810.12_3	protein_coding	ENST00000374517.5
MSTRG.177254.3	DCN	0.919628	0.919628	trans	0	0.115079	0.130311	0	0.114651	6.95054	18.0096	0.337577	0.131657	0.82908	0.07	5.25	6.19	5.45e-07	0.000168047	yes	up	NovelLncRNA	ENST00000390297.3	MSTRG.177254	-	IGLV1-44	lncRNA	0.587838	0	0.170901	0.137264	0	0.53063	14.9551	0	0.143362	3.01157	0.18	3.73	4.38	7.05e-05	0.0136149	yes	up	protein_coding	DCN-215	ENSG00000011465.16_3	protein_coding	ENST00000550099.5
MSTRG.93125.4	LILRB4	0.919515	0.919515	trans	0	0	0.009938	0	0	11.3823	10.3405	24.2382	0	53.3567	0	19.86	13.29	2.44e-10	1.15e-07	yes	up	NovelLncRNA	ENST00000641136.1	MSTRG.93125	-	IGHG3	lncRNA	0.357458	0.033063	0.336203	0.052788	0.742534	7.67852	4.95663	8.0352	0.778974	11.7634	0.3	6.64	4.45	9.67e-08	3.39e-05	yes	up	protein_coding	LILRB4-202	ENSG00000186818.12_3	protein_coding	ENST00000391733.7
MSTRG.177316.1	HIST1H2AB	0.919344	0.919344	trans	2.48247	1.14692	5.21863	0.168674	0.607192	153.655	345.888	4.37876	0.887586	76.1135	1.92	116.18	5.92	1.47e-122	7.89e-119	yes	up	NovelLncRNA	ENST00000390325.2	MSTRG.177316	-	IGLC3	lncRNA	0.361045	0.430524	0.081537	0.148297	0.20767	4.89004	7.27269	1.78167	0.079567	4.6644	0.25	3.74	3.93	0.000135274	0.0240895	yes	up	protein_coding	HIST1H2AB-201	ENSG00000278463.1_2	protein_coding	ENST00000615868.1
ENST00000602711.1	PGD	0.919029	0.919029	trans	4.00317	4.84342	8.63375	2.49243	9.53212	18.1752	11.8053	24.306	7.31206	35.5636	5.9	19.43	1.72	1.54e-06	0.000439593	yes	up	sense_intronic	AC025857.2-201	ENSG00000269899.1_4	sense_intronic	AC025857.2	lncRNA	15.1007	25.2135	15.9297	14.841	21.4869	31.2637	35.9438	38.0989	19.325	82.7583	18.51	41.48	1.16	6.44e-06	0.00163513	yes	up	protein_coding	PGD-201	ENSG00000142657.20_3	protein_coding	ENST00000270776.12
ENST00000602711.1	C15orf48	0.942765	0.918777	trans	4.00317	4.84342	8.63375	2.49243	9.53212	18.1752	11.8053	24.306	7.31206	35.5636	5.9	19.43	1.72	1.54e-06	0.000439593	yes	up	sense_intronic	AC025857.2-201	ENSG00000269899.1_4	sense_intronic	AC025857.2	lncRNA	1.16322	0.35726	0	0	2.25014	12.3046	5.30991	8.78401	0.80871	37.5808	0.75	12.96	4.1	4.63e-13	2.77e-10	yes	up	protein_coding	C15orf48-202	ENSG00000166920.12_3	protein_coding	ENST00000396650.6
ENST00000602711.1	C15orf48	0.918777	0.918777	trans	4.00317	4.84342	8.63375	2.49243	9.53212	18.1752	11.8053	24.306	7.31206	35.5636	5.9	19.43	1.72	1.54e-06	0.000439593	yes	up	sense_intronic	AC025857.2-201	ENSG00000269899.1_4	sense_intronic	AC025857.2	lncRNA	1.16322	0.35726	0	0	2.25014	12.3046	5.30991	8.78401	0.80871	37.5808	0.75	12.96	4.1	4.63e-13	2.77e-10	yes	up	protein_coding	C15orf48-202	ENSG00000166920.12_3	protein_coding	ENST00000396650.6
ENST00000446372.2	TNNC1	0.918754	0.918754	trans	2.34231	6.2857	6.12061	7.52794	5.40091	0.589612	0.588399	1.48897	3.68316	0.16996	5.54	1.3	-2.09	8.24e-06	0.00204015	yes	down	lincRNA	SFTA1P-203	ENSG00000225383.7_3	lincRNA	SFTA1P	lncRNA	3.0182	11.4286	8.28324	7.334	6.92641	0.111674	0.092388	2.058	2.48233	0.376771	7.4	1.02	-2.85	3.34e-09	1.41e-06	yes	down	protein_coding	TNNC1-201	ENSG00000114854.7_3	protein_coding	ENST00000232975.7
ENST00000589379.1	FCN3	0.918638	0.918638	trans	3.64998	2.721	2.25397	4.61814	4.11195	0.77509	0.121553	1.69942	0.766779	0.139955	3.47	0.7	-2.31	0.000212687	0.0354741	yes	down	antisense_RNA	AC011511.5-201	ENSG00000267607.1_3	antisense_RNA	AC011511.5	lncRNA	4.52515	5.60827	1.78752	10.8157	10.259	0	0	2.97529	0	1.07081	6.6	0.81	-3.03	1.12e-08	4.43e-06	yes	down	protein_coding	FCN3-202	ENSG00000142748.12_3	protein_coding	ENST00000354982.2
MSTRG.93124.1	AP1S2	0.918558	0.918558	trans	0	0	0.049056	0	0.624409	37.3412	42.7296	22.7203	0.072424	295.269	0.13	79.63	9.21	3.81e-69	1.04e-65	yes	up	NovelLncRNA	ENST00000641978.1	MSTRG.93124	-	IGHG4	lncRNA	0	0	0	0	0	0	6.0563	0	0	11.5506	0	3.52	8.46	5.57e-05	0.0111378	yes	up	protein_coding	AP1S2-201	ENSG00000182287.14_4	protein_coding	ENST00000329235.6
MSTRG.213352.17	GPIHBP1	0.918473	0.918473	trans	2.89851	6.95165	0.56411	4.71523	3.84999	0.482734	0.798633	0.95244	1.87166	0.613678	3.8	0.94	-2.01	0.000289578	0.0460805	yes	down	NovelLncRNA	ENST00000394684.8	MSTRG.213352	-	SGMS2	lncRNA	7.04778	15.0406	4.21339	6.44998	6.08076	1.39591	0.748406	2.70368	4.88818	0	7.77	1.95	-2	2.35e-07	7.78e-05	yes	down	protein_coding	GPIHBP1-201	ENSG00000277494.1_3	protein_coding	ENST00000622500.1
MSTRG.134898.1	LPL	0.91836	0.91836	trans	6.15572	4.53379	3.18066	2.59748	2.80364	0.739234	0.586685	1.06554	1.13279	0.665989	3.85	0.84	-2.2	0.000134897	0.0240347	yes	down	NovelLncRNA	ENST00000425690.7	MSTRG.134898	-	PVR	lncRNA	20.7349	16.4795	16.1332	17.3345	13.9785	5.51474	6.54997	7.4284	6.79946	2.92326	16.93	5.84	-1.53	2.61e-11	1.35e-08	yes	down	protein_coding	LPL-201	ENSG00000175445.14_3	protein_coding	ENST00000311322.8
MSTRG.177316.1	TDO2	0.918074	0.918074	trans	2.48247	1.14692	5.21863	0.168674	0.607192	153.655	345.888	4.37876	0.887586	76.1135	1.92	116.18	5.92	1.47e-122	7.89e-119	yes	up	NovelLncRNA	ENST00000390325.2	MSTRG.177316	-	IGLC3	lncRNA	0	0	0	0	0.350489	1.211	8.69934	1.45498	0.675204	3.37926	0.07	3.08	5.46	0.000139685	0.0247868	yes	up	protein_coding	TDO2-208	ENSG00000151790.8_3	protein_coding	ENST00000536354.2
ENST00000620635.1	ITPKC	0.917708	0.917708	trans	9.31867	6.5365	3.05319	6.65603	2.68266	1.47872	1.98479	2.08795	2.49397	1.36736	5.65	1.88	-1.59	8.94e-05	0.0168151	yes	down	lincRNA	AC068870.2-201	ENSG00000277782.1_3	lincRNA	AC068870.2	lncRNA	22.15	16.0495	3.00664	23.5005	5.80399	4.35149	3.49682	3.26057	11.0629	1.38679	14.1	4.71	-1.58	6.33e-10	2.87e-07	yes	down	protein_coding	ITPKC-201	ENSG00000086544.2_3	protein_coding	ENST00000263370.2
MSTRG.93125.4	HLA-DPB1	0.917608	0.917608	trans	0	0	0.009938	0	0	11.3823	10.3405	24.2382	0	53.3567	0	19.86	13.29	2.44e-10	1.15e-07	yes	up	NovelLncRNA	ENST00000641136.1	MSTRG.93125	-	IGHG3	lncRNA	39.7417	87.841	80.108	45.7369	93.1218	102.349	142.648	178.256	132.921	274.728	69.31	166.18	1.26	1.58e-23	1.66e-20	yes	up	protein_coding	HLA-DPB1-211	ENSG00000223865.10_3	protein_coding	ENST00000418931.6
ENST00000499098.1	PRSS12	0.917431	0.917431	trans	5.63234	7.51309	6.38303	9.98209	9.41123	1.83162	0.633777	3.68248	3.07844	1.3284	7.78	2.11	-1.88	4.99e-07	0.000154883	yes	down	antisense_RNA	AC096564.1-201	ENSG00000245293.2_4	antisense_RNA	AC096564.1	lncRNA	1.7965	2.20911	1.70608	4.30229	4.76134	0	0	0	1.87493	0	2.96	0.37	-2.98	0.000145281	0.0256626	yes	down	protein_coding	PRSS12-201	ENSG00000164099.3_3	protein_coding	ENST00000296498.3
MSTRG.177316.1	DCN	0.917376	0.917376	trans	2.48247	1.14692	5.21863	0.168674	0.607192	153.655	345.888	4.37876	0.887586	76.1135	1.92	116.18	5.92	1.47e-122	7.89e-119	yes	up	NovelLncRNA	ENST00000390325.2	MSTRG.177316	-	IGLC3	lncRNA	0.587838	0	0.170901	0.137264	0	0.53063	14.9551	0	0.143362	3.01157	0.18	3.73	4.38	7.05e-05	0.0136149	yes	up	protein_coding	DCN-215	ENSG00000011465.16_3	protein_coding	ENST00000550099.5
MSTRG.93124.1	HIST1H2BL	0.916966	0.916966	trans	0	0	0.049056	0	0.624409	37.3412	42.7296	22.7203	0.072424	295.269	0.13	79.63	9.21	3.81e-69	1.04e-65	yes	up	NovelLncRNA	ENST00000641978.1	MSTRG.93124	-	IGHG4	lncRNA	0.373086	0.574942	0.727867	1.22835	1.15793	5.92329	4.14147	2.87702	3.39356	11.5453	0.81	5.58	2.78	0.000120871	0.0218246	yes	up	protein_coding	HIST1H2BL-201	ENSG00000185130.5_3	protein_coding	ENST00000377401.3
ENST00000602711.1	ATF3	0.916922	0.916922	trans	4.00317	4.84342	8.63375	2.49243	9.53212	18.1752	11.8053	24.306	7.31206	35.5636	5.9	19.43	1.72	1.54e-06	0.000439593	yes	up	sense_intronic	AC025857.2-201	ENSG00000269899.1_4	sense_intronic	AC025857.2	lncRNA	0.174891	0.009611	0.00131	0.047888	0.127219	1.96629	2.95763	6.46387	0.052859	6.37558	0.07	3.56	5.63	3.99e-05	0.00834534	yes	up	protein_coding	ATF3-202	ENSG00000162772.16_4	protein_coding	ENST00000341491.8
ENST00000620635.1	KLF10	0.916825	0.916825	trans	9.31867	6.5365	3.05319	6.65603	2.68266	1.47872	1.98479	2.08795	2.49397	1.36736	5.65	1.88	-1.59	8.94e-05	0.0168151	yes	down	lincRNA	AC068870.2-201	ENSG00000277782.1_3	lincRNA	AC068870.2	lncRNA	40.5537	40.0577	11.9801	33.2877	13.5888	8.41938	13.5047	6.49755	25.0987	5.95311	27.89	11.89	-1.23	3.26e-14	2.15e-11	yes	down	protein_coding	KLF10-201	ENSG00000155090.14_3	protein_coding	ENST00000285407.10
ENST00000499098.1	TSPAN13	0.91674	0.91674	trans	5.63234	7.51309	6.38303	9.98209	9.41123	1.83162	0.633777	3.68248	3.07844	1.3284	7.78	2.11	-1.88	4.99e-07	0.000154883	yes	down	antisense_RNA	AC096564.1-201	ENSG00000245293.2_4	antisense_RNA	AC096564.1	lncRNA	14.3192	35.3281	23.2397	41.8751	26.4128	5.01142	5.85114	7.02447	13.4394	5.40897	28.24	7.35	-1.94	2.38e-22	2.4e-19	yes	down	protein_coding	TSPAN13-201	ENSG00000106537.7_3	protein_coding	ENST00000262067.4
MSTRG.93125.4	HIST1H2BI	0.916521	0.916521	trans	0	0	0.009938	0	0	11.3823	10.3405	24.2382	0	53.3567	0	19.86	13.29	2.44e-10	1.15e-07	yes	up	NovelLncRNA	ENST00000641136.1	MSTRG.93125	-	IGHG3	lncRNA	1.19265	3.24785	1.35024	3.66267	5.47158	8.48874	15.0237	8.54057	7.53056	32.678	2.98	14.45	2.28	9.66e-08	3.39e-05	yes	up	protein_coding	HIST1H2BI-201	ENSG00000278588.1_2	protein_coding	ENST00000377733.3
ENST00000589379.1	CAVIN2	0.916501	0.916501	trans	3.64998	2.721	2.25397	4.61814	4.11195	0.77509	0.121553	1.69942	0.766779	0.139955	3.47	0.7	-2.31	0.000212687	0.0354741	yes	down	antisense_RNA	AC011511.5-201	ENSG00000267607.1_3	antisense_RNA	AC011511.5	lncRNA	77.7869	62.7301	58.6207	113.797	62.3512	11.0562	3.13501	29.2165	45.6145	3.57172	75.06	18.52	-2.02	9.37e-59	2.2e-55	yes	down	protein_coding	CAVIN2-201	ENSG00000168497.4_4	protein_coding	ENST00000304141.4
MSTRG.93125.4	C1QB	0.915848	0.915848	trans	0	0	0.009938	0	0	11.3823	10.3405	24.2382	0	53.3567	0	19.86	13.29	2.44e-10	1.15e-07	yes	up	NovelLncRNA	ENST00000641136.1	MSTRG.93125	-	IGHG3	lncRNA	35.7548	30.5568	100.817	2.2855	76.9454	96.8535	92.6493	231.984	57.7002	278.296	49.27	151.5	1.62	1.26e-36	1.93e-33	yes	up	protein_coding	C1QB-201	ENSG00000173369.15_3	protein_coding	ENST00000314933.6
ENST00000555688.1	KLF10	0.915803	0.915803	trans	8.38361	7.81955	3.70913	9.41734	5.15456	2.55299	3.05767	3.24749	4.463	1.78727	6.9	3.02	-1.19	0.000210106	0.035155	yes	down	lincRNA	LINC00641-202	ENSG00000258441.1_2	processed_transcript	LINC00641	lncRNA	40.5537	40.0577	11.9801	33.2877	13.5888	8.41938	13.5047	6.49755	25.0987	5.95311	27.89	11.89	-1.23	3.26e-14	2.15e-11	yes	down	protein_coding	KLF10-201	ENSG00000155090.14_3	protein_coding	ENST00000285407.10
MSTRG.177254.3	RCN3	0.915679	0.915679	trans	0	0.115079	0.130311	0	0.114651	6.95054	18.0096	0.337577	0.131657	0.82908	0.07	5.25	6.19	5.45e-07	0.000168047	yes	up	NovelLncRNA	ENST00000390297.3	MSTRG.177254	-	IGLV1-44	lncRNA	0.886022	0.251838	1.0409	0.912418	0.157686	1.03569	18.3801	0.892366	3.55291	0.954226	0.65	4.96	2.93	0.000170743	0.029505	yes	up	protein_coding	RCN3-201	ENSG00000142552.7_3	protein_coding	ENST00000270645.7
ENST00000499098.1	FCN3	0.915315	0.915315	trans	5.63234	7.51309	6.38303	9.98209	9.41123	1.83162	0.633777	3.68248	3.07844	1.3284	7.78	2.11	-1.88	4.99e-07	0.000154883	yes	down	antisense_RNA	AC096564.1-201	ENSG00000245293.2_4	antisense_RNA	AC096564.1	lncRNA	4.52515	5.60827	1.78752	10.8157	10.259	0	0	2.97529	0	1.07081	6.6	0.81	-3.03	1.12e-08	4.43e-06	yes	down	protein_coding	FCN3-202	ENSG00000142748.12_3	protein_coding	ENST00000354982.2
MSTRG.169480.1	CXCL2	0.915136	0.915136	trans	0	8.45646	0	8.86978	0	0	0	0	0	0	3.47	0	-8.44	3.39e-06	0.000904746	yes	down	NovelLncRNA	ENST00000371621.4	MSTRG.169480	-	PTPN1	lncRNA	33.1845	56.8536	10.2949	97.6449	3.61241	2.84693	3.45679	5.84366	11.3146	0.423036	40.32	4.78	-3.08	9.14e-46	1.69e-42	yes	down	protein_coding	CXCL2-202	ENSG00000081041.8_3	protein_coding	ENST00000508487.2
ENST00000429730.1	CD68	0.916534	0.915107	trans	0.009558	0.137477	1.30742	0.496152	0.659683	2.83388	1.97939	3.91676	1.80286	14.2103	0.52	4.95	3.24	6.58e-05	0.0128349	yes	up	lincRNA	LINC01857-201	ENSG00000224137.1_2	lincRNA	LINC01857	lncRNA	8.33559	9.56667	27.6745	10.6958	20.2622	48.3426	47.6761	60.5951	20.9305	98.7788	15.31	55.26	1.85	3.06e-18	2.56e-15	yes	up	protein_coding	CD68-201	ENSG00000129226.13_3	protein_coding	ENST00000250092.10
ENST00000429730.1	CD68	0.915107	0.915107	trans	0.009558	0.137477	1.30742	0.496152	0.659683	2.83388	1.97939	3.91676	1.80286	14.2103	0.52	4.95	3.24	6.58e-05	0.0128349	yes	up	lincRNA	LINC01857-201	ENSG00000224137.1_2	lincRNA	LINC01857	lncRNA	8.33559	9.56667	27.6745	10.6958	20.2622	48.3426	47.6761	60.5951	20.9305	98.7788	15.31	55.26	1.85	3.06e-18	2.56e-15	yes	up	protein_coding	CD68-201	ENSG00000129226.13_3	protein_coding	ENST00000250092.10
ENST00000456363.1	VEGFD	0.914744	0.914744	trans	17.8198	24.6725	35.0572	40.9557	32.1116	2.57261	1.99956	12.9551	28.5294	4.56757	30.12	10.12	-1.57	2.08e-19	1.84e-16	yes	down	antisense_RNA	AC093110.1-201	ENSG00000238018.2_3	antisense_RNA	AC093110.1	lncRNA	8.9676	12.5446	17.001	16.4987	7.34885	1.70511	0.259827	1.75498	12.4627	0.013838	12.47	3.24	-1.94	9.97e-11	4.89e-08	yes	down	protein_coding	VEGFD-201	ENSG00000165197.4_3	protein_coding	ENST00000297904.3
MSTRG.213352.17	RND1	0.914718	0.914718	trans	2.89851	6.95165	0.56411	4.71523	3.84999	0.482734	0.798633	0.95244	1.87166	0.613678	3.8	0.94	-2.01	0.000289578	0.0460805	yes	down	NovelLncRNA	ENST00000394684.8	MSTRG.213352	-	SGMS2	lncRNA	4.77178	8.52076	2.22654	8.6289	8.7649	1.98284	0.452642	0.998589	2.96711	0.615709	6.58	1.4	-2.23	5.2e-07	0.000160778	yes	down	protein_coding	RND1-201	ENSG00000172602.9_3	protein_coding	ENST00000309739.5
MSTRG.246995.1	TYMP	0.914701	0.914701	trans	0	0	2.55594	0	3.99632	6.06922	0	12.5767	1.35093	13.5371	1.31	6.71	2.36	0.000188021	0.0319724	yes	up	NovelLncRNA	ENST00000418931.6	MSTRG.246995	-	HLA-DPB1	lncRNA	0	0	0	0	0	0	0	16.6652	0	14.7366	0	6.28	9.3	4.36e-08	1.61e-05	yes	up	protein_coding	TYMP-202	ENSG00000025708.13_3	protein_coding	ENST00000395678.7
MSTRG.177316.1	MMP14	0.914404	0.914404	trans	2.48247	1.14692	5.21863	0.168674	0.607192	153.655	345.888	4.37876	0.887586	76.1135	1.92	116.18	5.92	1.47e-122	7.89e-119	yes	up	NovelLncRNA	ENST00000390325.2	MSTRG.177316	-	IGLC3	lncRNA	11.5244	12.2561	12.3029	17.6086	13.67	61.5504	119.432	38.8656	22.8789	79.93	13.47	64.53	2.26	3.76e-29	4.74e-26	yes	up	protein_coding	MMP14-201	ENSG00000157227.12_3	protein_coding	ENST00000311852.10
MSTRG.213352.17	FAM46B	0.913819	0.913819	trans	2.89851	6.95165	0.56411	4.71523	3.84999	0.482734	0.798633	0.95244	1.87166	0.613678	3.8	0.94	-2.01	0.000289578	0.0460805	yes	down	NovelLncRNA	ENST00000394684.8	MSTRG.213352	-	SGMS2	lncRNA	3.40651	8.05231	3.68486	6.93098	4.6264	0.818987	0.479507	1.60874	1.34015	0.881492	5.34	1.03	-2.38	3.2e-06	0.000860554	yes	down	protein_coding	FAM46B-201	ENSG00000158246.7_3	protein_coding	ENST00000289166.5
ENST00000446372.2	ITGA8	0.913786	0.913786	trans	2.34231	6.2857	6.12061	7.52794	5.40091	0.589612	0.588399	1.48897	3.68316	0.16996	5.54	1.3	-2.09	8.24e-06	0.00204015	yes	down	lincRNA	SFTA1P-203	ENSG00000225383.7_3	lincRNA	SFTA1P	lncRNA	10.8376	12.0319	15.468	17.9704	13.8667	1.86277	2.46702	8.68152	13.859	1.63238	14.03	5.7	-1.3	2.89e-08	1.09e-05	yes	down	protein_coding	ITGA8-201	ENSG00000077943.7_3	protein_coding	ENST00000378076.3
MSTRG.93125.4	MAN2B1	0.913772	0.913772	trans	0	0	0.009938	0	0	11.3823	10.3405	24.2382	0	53.3567	0	19.86	13.29	2.44e-10	1.15e-07	yes	up	NovelLncRNA	ENST00000641136.1	MSTRG.93125	-	IGHG3	lncRNA	3.11497	6.4147	9.48967	7.45541	4.06649	7.44912	17.5711	10.5648	7.60916	49.036	6.11	18.45	1.59	1.44e-05	0.0034148	yes	up	protein_coding	MAN2B1-203	ENSG00000104774.12_3	protein_coding	ENST00000456935.6
MSTRG.93724.1	HERPUD1	0.91356	0.91356	trans	0.023055	0.004473	0.006798	0.017749	0	3.27324	8.22979	0.350965	1.86885	1.34069	0.01	3.01	8.18	0.000306542	0.048384	yes	up	NovelLncRNA	ENST00000560830.1	MSTRG.93724	-	GREM1	lncRNA	0.480927	0.044027	4.59278	0.725905	15.1123	33.8359	60.3568	14.3058	23.9175	33.9412	4.19	33.27	2.99	6.9e-23	7.08e-20	yes	up	protein_coding	HERPUD1-201	ENSG00000051108.14_4	protein_coding	ENST00000300302.9
ENST00000429730.1	COL5A2	0.913161	0.913161	trans	0.009558	0.137477	1.30742	0.496152	0.659683	2.83388	1.97939	3.91676	1.80286	14.2103	0.52	4.95	3.24	6.58e-05	0.0128349	yes	up	lincRNA	LINC01857-201	ENSG00000224137.1_2	lincRNA	LINC01857	lncRNA	1.01747	0	7.0426	1.70832	0.017515	33.5623	6.94549	2.20277	2.30594	68.135	1.96	22.63	3.53	4.08e-19	3.57e-16	yes	up	protein_coding	COL5A2-201	ENSG00000204262.11_3	protein_coding	ENST00000374866.7
ENST00000602711.1	RGS10	0.913026	0.913026	trans	4.00317	4.84342	8.63375	2.49243	9.53212	18.1752	11.8053	24.306	7.31206	35.5636	5.9	19.43	1.72	1.54e-06	0.000439593	yes	up	sense_intronic	AC025857.2-201	ENSG00000269899.1_4	sense_intronic	AC025857.2	lncRNA	2.42039	2.62401	3.06164	0	3.87691	4.65585	5.81766	10.6295	7.9777	18.5444	2.4	9.53	1.99	0.000111911	0.0204601	yes	up	protein_coding	RGS10-202	ENSG00000148908.14_3	protein_coding	ENST00000369103.2
ENST00000563635.5	TSPAN13	0.912959	0.912959	trans	10.9089	23.6852	23.369	24.6353	21.4244	4.04301	1.77789	11.762	7.08141	3.94093	20.8	5.72	-1.86	3e-16	2.19e-13	yes	down	processed_transcript	AL137782.1-201	ENSG00000261553.5_4	processed_transcript	AL137782.1	lncRNA	14.3192	35.3281	23.2397	41.8751	26.4128	5.01142	5.85114	7.02447	13.4394	5.40897	28.24	7.35	-1.94	2.38e-22	2.4e-19	yes	down	protein_coding	TSPAN13-201	ENSG00000106537.7_3	protein_coding	ENST00000262067.4
ENST00000602711.1	HLA-DPB1	0.912947	0.912947	trans	4.00317	4.84342	8.63375	2.49243	9.53212	18.1752	11.8053	24.306	7.31206	35.5636	5.9	19.43	1.72	1.54e-06	0.000439593	yes	up	sense_intronic	AC025857.2-201	ENSG00000269899.1_4	sense_intronic	AC025857.2	lncRNA	39.7417	87.841	80.108	45.7369	93.1218	102.349	142.648	178.256	132.921	274.728	69.31	166.18	1.26	1.58e-23	1.66e-20	yes	up	protein_coding	HLA-DPB1-211	ENSG00000223865.10_3	protein_coding	ENST00000418931.6
MSTRG.93724.1	DCN	0.912618	0.912618	trans	0.023055	0.004473	0.006798	0.017749	0	3.27324	8.22979	0.350965	1.86885	1.34069	0.01	3.01	8.18	0.000306542	0.048384	yes	up	NovelLncRNA	ENST00000560830.1	MSTRG.93724	-	GREM1	lncRNA	0.587838	0	0.170901	0.137264	0	0.53063	14.9551	0	0.143362	3.01157	0.18	3.73	4.38	7.05e-05	0.0136149	yes	up	protein_coding	DCN-215	ENSG00000011465.16_3	protein_coding	ENST00000550099.5
ENST00000429730.1	FCER1G	0.912199	0.912199	trans	0.009558	0.137477	1.30742	0.496152	0.659683	2.83388	1.97939	3.91676	1.80286	14.2103	0.52	4.95	3.24	6.58e-05	0.0128349	yes	up	lincRNA	LINC01857-201	ENSG00000224137.1_2	lincRNA	LINC01857	lncRNA	24.1599	20.8105	39.3476	11.3956	31.6745	68.1987	44.3957	67.2073	28.2886	111.426	25.48	63.9	1.33	4.6e-11	2.34e-08	yes	up	protein_coding	FCER1G-201	ENSG00000158869.10_3	protein_coding	ENST00000289902.1
MSTRG.93124.1	CYP1B1	0.911952	0.911952	trans	0	0	0.049056	0	0.624409	37.3412	42.7296	22.7203	0.072424	295.269	0.13	79.63	9.21	3.81e-69	1.04e-65	yes	up	NovelLncRNA	ENST00000641978.1	MSTRG.93124	-	IGHG4	lncRNA	4.05598	5.13931	4.39883	2.78659	2.05741	17.9153	30.0046	15.3453	15.4134	54.3234	3.69	26.6	2.85	1.33e-17	1.07e-14	yes	up	protein_coding	CYP1B1-205	ENSG00000138061.11_3	protein_coding	ENST00000610745.4
ENST00000499098.1	ADGRF5	0.911864	0.911864	trans	5.63234	7.51309	6.38303	9.98209	9.41123	1.83162	0.633777	3.68248	3.07844	1.3284	7.78	2.11	-1.88	4.99e-07	0.000154883	yes	down	antisense_RNA	AC096564.1-201	ENSG00000245293.2_4	antisense_RNA	AC096564.1	lncRNA	28.1203	45.8713	22.0376	58.5205	45.9178	7.56854	6.22982	10.6938	31.6858	5.34062	40.09	12.3	-1.7	2.2e-27	2.61e-24	yes	down	protein_coding	ADGRF5-201	ENSG00000069122.18_3	protein_coding	ENST00000265417.7
MSTRG.93124.1	HLA-DMB	0.911862	0.911862	trans	0	0	0.049056	0	0.624409	37.3412	42.7296	22.7203	0.072424	295.269	0.13	79.63	9.21	3.81e-69	1.04e-65	yes	up	NovelLncRNA	ENST00000641978.1	MSTRG.93124	-	IGHG4	lncRNA	3.49556	12.0651	12.1041	5.14825	12.3864	23.0102	16.8634	40.5221	14.5198	75.2086	9.04	34.02	1.91	1.93e-12	1.1e-09	yes	up	protein_coding	HLA-DMB-258	ENSG00000242574.8_3	protein_coding	ENST00000418107.2
ENST00000563635.5	CKB	0.911851	0.911851	trans	10.9089	23.6852	23.369	24.6353	21.4244	4.04301	1.77789	11.762	7.08141	3.94093	20.8	5.72	-1.86	3e-16	2.19e-13	yes	down	processed_transcript	AL137782.1-201	ENSG00000261553.5_4	processed_transcript	AL137782.1	lncRNA	5.85288	7.40576	7.42558	10.2601	8.00858	2.63399	1.90651	5.2075	5.73906	0.912537	7.79	3.28	-1.25	5.29e-05	0.0106665	yes	down	protein_coding	CKB-201	ENSG00000166165.12_3	protein_coding	ENST00000348956.6
MSTRG.41926.9	MAMDC2	0.911831	0.911831	trans	9.33504	11.1079	5.11575	9.84899	8.73034	2.91356	1.08113	3.44851	4.45224	0.488951	8.83	2.48	-1.83	1.28e-07	4.4e-05	yes	down	NovelLncRNA	ENST00000227756.4	MSTRG.41926	-	GALNT18	lncRNA	12.0164	13.4333	10.2517	20.3471	11.623	0.729145	0.148974	5.35653	6.43966	0.321451	13.53	2.6	-2.38	1.22e-13	7.68e-11	yes	down	protein_coding	MAMDC2-201	ENSG00000165072.9_3	protein_coding	ENST00000377182.4
ENST00000555688.1	WWC3	0.911827	0.911827	trans	8.38361	7.81955	3.70913	9.41734	5.15456	2.55299	3.05767	3.24749	4.463	1.78727	6.9	3.02	-1.19	0.000210106	0.035155	yes	down	lincRNA	LINC00641-202	ENSG00000258441.1_2	processed_transcript	LINC00641	lncRNA	5.84836	7.71862	3.56957	9.83099	5.5537	0.000954	2.23577	3.6837	3.2816	2.26578	6.5	2.29	-1.5	4.37e-05	0.0090386	yes	down	protein_coding	WWC3-201	ENSG00000047644.18_3	protein_coding	ENST00000380861.8
MSTRG.93124.1	PLA2G2D	0.911802	0.911802	trans	0	0	0.049056	0	0.624409	37.3412	42.7296	22.7203	0.072424	295.269	0.13	79.63	9.21	3.81e-69	1.04e-65	yes	up	NovelLncRNA	ENST00000641978.1	MSTRG.93124	-	IGHG4	lncRNA	0.055666	0.16016	1.4543	0.221302	1.14631	7.86248	3.57437	15.9517	1.55005	31.7736	0.61	12.14	4.32	9.31e-13	5.46e-10	yes	up	protein_coding	PLA2G2D-201	ENSG00000117215.14_3	protein_coding	ENST00000375105.7
ENST00000602711.1	CYBB	0.911748	0.911748	trans	4.00317	4.84342	8.63375	2.49243	9.53212	18.1752	11.8053	24.306	7.31206	35.5636	5.9	19.43	1.72	1.54e-06	0.000439593	yes	up	sense_intronic	AC025857.2-201	ENSG00000269899.1_4	sense_intronic	AC025857.2	lncRNA	10.4091	21.3221	25.7575	11.7448	40.9207	40.0288	58.765	79.1161	37.4944	224.001	22.03	87.88	2	6.04e-32	8.23e-29	yes	up	protein_coding	CYBB-201	ENSG00000165168.7_3	protein_coding	ENST00000378588.4
MSTRG.93724.1	TDO2	0.911695	0.911695	trans	0.023055	0.004473	0.006798	0.017749	0	3.27324	8.22979	0.350965	1.86885	1.34069	0.01	3.01	8.18	0.000306542	0.048384	yes	up	NovelLncRNA	ENST00000560830.1	MSTRG.93724	-	GREM1	lncRNA	0	0	0	0	0.350489	1.211	8.69934	1.45498	0.675204	3.37926	0.07	3.08	5.46	0.000139685	0.0247868	yes	up	protein_coding	TDO2-208	ENSG00000151790.8_3	protein_coding	ENST00000536354.2
ENST00000555688.1	SERTAD1	0.911474	0.911474	trans	8.38361	7.81955	3.70913	9.41734	5.15456	2.55299	3.05767	3.24749	4.463	1.78727	6.9	3.02	-1.19	0.000210106	0.035155	yes	down	lincRNA	LINC00641-202	ENSG00000258441.1_2	processed_transcript	LINC00641	lncRNA	8.40644	5.56418	3.25095	11.4353	3.10861	2.81202	2.90426	2.39994	1.70912	0.835522	6.35	2.13	-1.58	3.47e-05	0.00740138	yes	down	protein_coding	SERTAD1-201	ENSG00000197019.4_3	protein_coding	ENST00000357949.4
MSTRG.41926.9	TACSTD2	0.911431	0.911431	trans	9.33504	11.1079	5.11575	9.84899	8.73034	2.91356	1.08113	3.44851	4.45224	0.488951	8.83	2.48	-1.83	1.28e-07	4.4e-05	yes	down	NovelLncRNA	ENST00000227756.4	MSTRG.41926	-	GALNT18	lncRNA	11.7643	27.6268	10.5916	21.1754	18.9357	5.9659	1.56861	4.83315	7.54828	5.47732	18.02	5.08	-1.83	4.98e-14	3.22e-11	yes	down	protein_coding	TACSTD2-201	ENSG00000184292.6_3	protein_coding	ENST00000371225.3
MSTRG.177316.1	LGALS1	0.911258	0.911258	trans	2.48247	1.14692	5.21863	0.168674	0.607192	153.655	345.888	4.37876	0.887586	76.1135	1.92	116.18	5.92	1.47e-122	7.89e-119	yes	up	NovelLncRNA	ENST00000390325.2	MSTRG.177316	-	IGLC3	lncRNA	51.318	28.0797	36.2516	51.8542	35.4637	86.2083	144.957	77.6131	31.6508	82.9249	40.59	84.67	1.06	1.25e-08	4.9e-06	yes	up	protein_coding	LGALS1-201	ENSG00000100097.11_3	protein_coding	ENST00000215909.9
MSTRG.85501.1	COL15A1	0.910994	0.910994	trans	0	0	0	0	0	0	43.9449	0	0	0	0	8.79	9.78	9.64e-11	4.75e-08	yes	up	NovelLncRNA	ENST00000635274.1	MSTRG.85501	-	AL139099.5	lncRNA	6.67432	3.28837	3.8202	6.91843	2.01879	23.3759	49.2524	7.09563	6.33161	3.58227	4.54	17.93	1.98	1.33e-07	4.57e-05	yes	up	protein_coding	COL15A1-201	ENSG00000204291.10_3	protein_coding	ENST00000375001.7
ENST00000623837.1	PCDH1	36944	0.910988	cis	10.0677	5.97646	5.01634	5.34204	4.63692	1.3835	0.12084	3.82674	3.10973	0.622899	6.21	1.81	-1.78	1.32e-05	0.00313725	yes	down	lincRNA	AC005753.1-201	ENSG00000278925.1_3	lincRNA	AC005753.1	lncRNA	12.4419	11.3148	9.95929	11.5818	9.02907	2.06604	3.52265	7.96406	6.5632	1.96248	10.87	4.42	-1.3	1.06e-06	0.00031291	yes	down	protein_coding	PCDH1-203	ENSG00000156453.13_3	protein_coding	ENST00000394536.4
ENST00000623837.1	PCDH1	27403	0.910988	cis	10.0677	5.97646	5.01634	5.34204	4.63692	1.3835	0.12084	3.82674	3.10973	0.622899	6.21	1.81	-1.78	1.32e-05	0.00313725	yes	down	lincRNA	AC005753.1-201	ENSG00000278925.1_3	lincRNA	AC005753.1	lncRNA	12.4419	11.3148	9.95929	11.5818	9.02907	2.06604	3.52265	7.96406	6.5632	1.96248	10.87	4.42	-1.3	1.06e-06	0.00031291	yes	down	protein_coding	PCDH1-203	ENSG00000156453.13_3	protein_coding	ENST00000394536.4
ENST00000623837.1	PCDH1	27665	0.910988	cis	10.0677	5.97646	5.01634	5.34204	4.63692	1.3835	0.12084	3.82674	3.10973	0.622899	6.21	1.81	-1.78	1.32e-05	0.00313725	yes	down	lincRNA	AC005753.1-201	ENSG00000278925.1_3	lincRNA	AC005753.1	lncRNA	12.4419	11.3148	9.95929	11.5818	9.02907	2.06604	3.52265	7.96406	6.5632	1.96248	10.87	4.42	-1.3	1.06e-06	0.00031291	yes	down	protein_coding	PCDH1-203	ENSG00000156453.13_3	protein_coding	ENST00000394536.4
ENST00000623837.1	PCDH1	0.910988	0.910988	trans	10.0677	5.97646	5.01634	5.34204	4.63692	1.3835	0.12084	3.82674	3.10973	0.622899	6.21	1.81	-1.78	1.32e-05	0.00313725	yes	down	lincRNA	AC005753.1-201	ENSG00000278925.1_3	lincRNA	AC005753.1	lncRNA	12.4419	11.3148	9.95929	11.5818	9.02907	2.06604	3.52265	7.96406	6.5632	1.96248	10.87	4.42	-1.3	1.06e-06	0.00031291	yes	down	protein_coding	PCDH1-203	ENSG00000156453.13_3	protein_coding	ENST00000394536.4
ENST00000563635.5	EPCAM	0.91097	0.91097	trans	10.9089	23.6852	23.369	24.6353	21.4244	4.04301	1.77789	11.762	7.08141	3.94093	20.8	5.72	-1.86	3e-16	2.19e-13	yes	down	processed_transcript	AL137782.1-201	ENSG00000261553.5_4	processed_transcript	AL137782.1	lncRNA	7.96577	20.0499	11.8526	15.2104	16.8768	1.77154	1.02321	5.88133	9.00561	4.5991	14.39	4.46	-1.69	9.86e-11	4.85e-08	yes	down	protein_coding	EPCAM-201	ENSG00000119888.10_3	protein_coding	ENST00000263735.8
ENST00000602711.1	IFI30	0.910831	0.910831	trans	4.00317	4.84342	8.63375	2.49243	9.53212	18.1752	11.8053	24.306	7.31206	35.5636	5.9	19.43	1.72	1.54e-06	0.000439593	yes	up	sense_intronic	AC025857.2-201	ENSG00000269899.1_4	sense_intronic	AC025857.2	lncRNA	35.2929	57.1514	63.5486	22.337	14.2284	131.162	8.54674	127.883	37.0747	256.395	38.51	112.21	1.54	4.97e-25	5.42e-22	yes	up	protein_coding	IFI30-201	ENSG00000216490.3_3	protein_coding	ENST00000407280.3
ENST00000555688.1	SNN	0.910581	0.910581	trans	8.38361	7.81955	3.70913	9.41734	5.15456	2.55299	3.05767	3.24749	4.463	1.78727	6.9	3.02	-1.19	0.000210106	0.035155	yes	down	lincRNA	LINC00641-202	ENSG00000258441.1_2	processed_transcript	LINC00641	lncRNA	4.14253	2.53755	0	6.15565	0	0	0	0	0	0	2.57	0	-8.01	7.17e-05	0.0137972	yes	down	protein_coding	SNN-201	ENSG00000184602.5_3	protein_coding	ENST00000329565.5
MSTRG.93125.4	IFI30	0.910145	0.910145	trans	0	0	0.009938	0	0	11.3823	10.3405	24.2382	0	53.3567	0	19.86	13.29	2.44e-10	1.15e-07	yes	up	NovelLncRNA	ENST00000641136.1	MSTRG.93125	-	IGHG3	lncRNA	35.2929	57.1514	63.5486	22.337	14.2284	131.162	8.54674	127.883	37.0747	256.395	38.51	112.21	1.54	4.97e-25	5.42e-22	yes	up	protein_coding	IFI30-201	ENSG00000216490.3_3	protein_coding	ENST00000407280.3
MSTRG.93125.6	CPNE5	0.910042	0.910042	trans	5.75836	8.58739	22.211	2.83516	2.01382	1264.25	1166.7	16.4888	36.6577	10.0191	8.28	498.82	5.91	0	0	yes	up	NovelLncRNA	ENST00000390548.6	MSTRG.93125	-	IGHG1	lncRNA	0.024384	0.033414	0	0.008646	0.195076	9.22319	4.02566	1.65589	1.09509	0.07575	0.05	3.22	5.94	8.96e-05	0.0168164	yes	up	protein_coding	CPNE5-202	ENSG00000124772.11_3	protein_coding	ENST00000393189.2
ENST00000555688.1	SOCS3	0.909826	0.909826	trans	8.38361	7.81955	3.70913	9.41734	5.15456	2.55299	3.05767	3.24749	4.463	1.78727	6.9	3.02	-1.19	0.000210106	0.035155	yes	down	lincRNA	LINC00641-202	ENSG00000258441.1_2	processed_transcript	LINC00641	lncRNA	115.71	114.831	64.3993	222.752	64.0668	40.5929	51.5756	39.4295	42.5815	10.1147	116.35	36.86	-1.66	4.43e-74	1.31e-70	yes	down	protein_coding	SOCS3-201	ENSG00000184557.4_3	protein_coding	ENST00000330871.3
MSTRG.246995.1	PLA2G2D	0.909591	0.909591	trans	0	0	2.55594	0	3.99632	6.06922	0	12.5767	1.35093	13.5371	1.31	6.71	2.36	0.000188021	0.0319724	yes	up	NovelLncRNA	ENST00000418931.6	MSTRG.246995	-	HLA-DPB1	lncRNA	0.055666	0.16016	1.4543	0.221302	1.14631	7.86248	3.57437	15.9517	1.55005	31.7736	0.61	12.14	4.32	9.31e-13	5.46e-10	yes	up	protein_coding	PLA2G2D-201	ENSG00000117215.14_3	protein_coding	ENST00000375105.7
MSTRG.93124.1	HIST1H2AM	0.909052	0.909052	trans	0	0	0.049056	0	0.624409	37.3412	42.7296	22.7203	0.072424	295.269	0.13	79.63	9.21	3.81e-69	1.04e-65	yes	up	NovelLncRNA	ENST00000641978.1	MSTRG.93124	-	IGHG4	lncRNA	3.78213	5.42066	3.44915	12.0081	11.9581	22.2854	41.2778	16.199	17.4958	69.0922	7.32	33.27	2.18	5.21e-15	3.57e-12	yes	up	protein_coding	HIST1H2AM-201	ENSG00000278677.1_3	protein_coding	ENST00000359611.3
ENST00000602711.1	TMEM176A	0.909023	0.909023	trans	4.00317	4.84342	8.63375	2.49243	9.53212	18.1752	11.8053	24.306	7.31206	35.5636	5.9	19.43	1.72	1.54e-06	0.000439593	yes	up	sense_intronic	AC025857.2-201	ENSG00000269899.1_4	sense_intronic	AC025857.2	lncRNA	0	0	7.60053	0	0	9.07576	5.44075	12.5514	0	14.2187	1.52	8.26	2.44	2.04e-05	0.00464593	yes	up	protein_coding	TMEM176A-210	ENSG00000002933.7_3	protein_coding	ENST00000484928.5
MSTRG.41926.9	FAM46B	0.908823	0.908823	trans	9.33504	11.1079	5.11575	9.84899	8.73034	2.91356	1.08113	3.44851	4.45224	0.488951	8.83	2.48	-1.83	1.28e-07	4.4e-05	yes	down	NovelLncRNA	ENST00000227756.4	MSTRG.41926	-	GALNT18	lncRNA	3.40651	8.05231	3.68486	6.93098	4.6264	0.818987	0.479507	1.60874	1.34015	0.881492	5.34	1.03	-2.38	3.2e-06	0.000860554	yes	down	protein_coding	FAM46B-201	ENSG00000158246.7_3	protein_coding	ENST00000289166.5
ENST00000446372.2	EPCAM	0.908701	0.908701	trans	2.34231	6.2857	6.12061	7.52794	5.40091	0.589612	0.588399	1.48897	3.68316	0.16996	5.54	1.3	-2.09	8.24e-06	0.00204015	yes	down	lincRNA	SFTA1P-203	ENSG00000225383.7_3	lincRNA	SFTA1P	lncRNA	7.96577	20.0499	11.8526	15.2104	16.8768	1.77154	1.02321	5.88133	9.00561	4.5991	14.39	4.46	-1.69	9.86e-11	4.85e-08	yes	down	protein_coding	EPCAM-201	ENSG00000119888.10_3	protein_coding	ENST00000263735.8
ENST00000429730.1	HLA-A	0.908685	0.908685	trans	0.009558	0.137477	1.30742	0.496152	0.659683	2.83388	1.97939	3.91676	1.80286	14.2103	0.52	4.95	3.24	6.58e-05	0.0128349	yes	up	lincRNA	LINC01857-201	ENSG00000224137.1_2	lincRNA	LINC01857	lncRNA	0.001696	0.009531	0.005524	0.398006	0.449959	12.4656	0.005935	0.018193	0.028602	26.792	0.17	7.86	5.51	1.14e-09	5.08e-07	yes	up	protein_coding	HLA-A-204	ENSG00000206503.12_3	protein_coding	ENST00000396634.5
MSTRG.246995.1	CAPG	0.908328	0.908328	trans	0	0	2.55594	0	3.99632	6.06922	0	12.5767	1.35093	13.5371	1.31	6.71	2.36	0.000188021	0.0319724	yes	up	NovelLncRNA	ENST00000418931.6	MSTRG.246995	-	HLA-DPB1	lncRNA	0	0	0	0	0	0	0	23.4077	0	34.6216	0	11.61	10.18	1.4e-13	8.81e-11	yes	up	protein_coding	CAPG-205	ENSG00000042493.15_3	protein_coding	ENST00000409921.5
ENST00000602711.1	RASSF4	0.908239	0.908239	trans	4.00317	4.84342	8.63375	2.49243	9.53212	18.1752	11.8053	24.306	7.31206	35.5636	5.9	19.43	1.72	1.54e-06	0.000439593	yes	up	sense_intronic	AC025857.2-201	ENSG00000269899.1_4	sense_intronic	AC025857.2	lncRNA	0.606848	0.511191	0.417158	1.36356	1.19944	5.15901	4.28644	7.08725	1.49081	25.9366	0.82	8.79	3.42	4.27e-08	1.58e-05	yes	up	protein_coding	RASSF4-201	ENSG00000107551.20_3	protein_coding	ENST00000340258.9
ENST00000429730.1	IFI30	0.908163	0.908163	trans	0.009558	0.137477	1.30742	0.496152	0.659683	2.83388	1.97939	3.91676	1.80286	14.2103	0.52	4.95	3.24	6.58e-05	0.0128349	yes	up	lincRNA	LINC01857-201	ENSG00000224137.1_2	lincRNA	LINC01857	lncRNA	35.2929	57.1514	63.5486	22.337	14.2284	131.162	8.54674	127.883	37.0747	256.395	38.51	112.21	1.54	4.97e-25	5.42e-22	yes	up	protein_coding	IFI30-201	ENSG00000216490.3_3	protein_coding	ENST00000407280.3
MSTRG.177316.1	CYBA	0.908069	0.908069	trans	2.48247	1.14692	5.21863	0.168674	0.607192	153.655	345.888	4.37876	0.887586	76.1135	1.92	116.18	5.92	1.47e-122	7.89e-119	yes	up	NovelLncRNA	ENST00000390325.2	MSTRG.177316	-	IGLC3	lncRNA	8.49491	12.6395	10.03	7.02878	8.82617	54.8652	71.2882	33.2185	6.6567	39.1172	9.4	41.03	2.13	2.07e-17	1.64e-14	yes	up	protein_coding	CYBA-201	ENSG00000051523.10_3	protein_coding	ENST00000261623.7
MSTRG.41926.9	BMPR2	0.907565	0.907565	trans	9.33504	11.1079	5.11575	9.84899	8.73034	2.91356	1.08113	3.44851	4.45224	0.488951	8.83	2.48	-1.83	1.28e-07	4.4e-05	yes	down	NovelLncRNA	ENST00000227756.4	MSTRG.41926	-	GALNT18	lncRNA	31.287	32.9888	15.5183	44.4693	30.4774	5.37462	9.03939	10.2999	19.5436	11.4631	30.95	11.14	-1.47	1.16e-18	9.86e-16	yes	down	protein_coding	BMPR2-202	ENSG00000204217.13_3	protein_coding	ENST00000374580.8
ENST00000499098.1	ANOS1	0.907474	0.907474	trans	5.63234	7.51309	6.38303	9.98209	9.41123	1.83162	0.633777	3.68248	3.07844	1.3284	7.78	2.11	-1.88	4.99e-07	0.000154883	yes	down	antisense_RNA	AC096564.1-201	ENSG00000245293.2_4	antisense_RNA	AC096564.1	lncRNA	4.55025	12.408	10.6789	22.6791	15.642	1.1308	1.69497	2.89504	6.10892	4.84749	13.19	3.34	-1.98	1.86e-11	9.85e-09	yes	down	protein_coding	ANOS1-201	ENSG00000011201.11_3	protein_coding	ENST00000262648.7
MSTRG.93724.1	TAGLN	0.907406	0.907406	trans	0.023055	0.004473	0.006798	0.017749	0	3.27324	8.22979	0.350965	1.86885	1.34069	0.01	3.01	8.18	0.000306542	0.048384	yes	up	NovelLncRNA	ENST00000560830.1	MSTRG.93724	-	GREM1	lncRNA	0.482336	0.321404	0.478603	0.336471	0.212504	0.689692	90.6664	0.630781	0.261555	0.250543	0.37	18.5	5.66	7.55e-21	7.26e-18	yes	up	protein_coding	TAGLN-206	ENSG00000149591.16_3	protein_coding	ENST00000530649.5
ENST00000555688.1	TNFRSF10D	0.907342	0.907342	trans	8.38361	7.81955	3.70913	9.41734	5.15456	2.55299	3.05767	3.24749	4.463	1.78727	6.9	3.02	-1.19	0.000210106	0.035155	yes	down	lincRNA	LINC00641-202	ENSG00000258441.1_2	processed_transcript	LINC00641	lncRNA	10.8788	7.46327	1.91409	19.756	5.94856	2.83181	2.14458	3.15434	4.66536	0.676275	9.19	2.69	-1.77	1.2e-07	4.14e-05	yes	down	protein_coding	TNFRSF10D-201	ENSG00000173530.5_3	protein_coding	ENST00000312584.3
ENST00000456363.1	EGR1	0.907232	0.907232	trans	17.8198	24.6725	35.0572	40.9557	32.1116	2.57261	1.99956	12.9551	28.5294	4.56757	30.12	10.12	-1.57	2.08e-19	1.84e-16	yes	down	antisense_RNA	AC093110.1-201	ENSG00000238018.2_3	antisense_RNA	AC093110.1	lncRNA	49.3399	85.1616	142.983	182.986	126.001	43.9942	32.1686	80.6637	73.6386	28.2599	117.29	51.74	-1.18	2.71e-52	5.85e-49	yes	down	protein_coding	EGR1-201	ENSG00000120738.7_3	protein_coding	ENST00000239938.4
ENST00000623837.1	LPL	0.907227	0.907227	trans	10.0677	5.97646	5.01634	5.34204	4.63692	1.3835	0.12084	3.82674	3.10973	0.622899	6.21	1.81	-1.78	1.32e-05	0.00313725	yes	down	lincRNA	AC005753.1-201	ENSG00000278925.1_3	lincRNA	AC005753.1	lncRNA	20.7349	16.4795	16.1332	17.3345	13.9785	5.51474	6.54997	7.4284	6.79946	2.92326	16.93	5.84	-1.53	2.61e-11	1.35e-08	yes	down	protein_coding	LPL-201	ENSG00000175445.14_3	protein_coding	ENST00000311322.8
ENST00000499098.1	KDR	0.906866	0.906866	trans	5.63234	7.51309	6.38303	9.98209	9.41123	1.83162	0.633777	3.68248	3.07844	1.3284	7.78	2.11	-1.88	4.99e-07	0.000154883	yes	down	antisense_RNA	AC096564.1-201	ENSG00000245293.2_4	antisense_RNA	AC096564.1	lncRNA	11.6322	18.4956	9.95515	24.3325	16.6114	1.07347	6.62738	5.94553	9.07807	3.36141	16.21	5.22	-1.64	1.54e-11	8.22e-09	yes	down	protein_coding	KDR-201	ENSG00000128052.8_3	protein_coding	ENST00000263923.4
ENST00000429730.1	HLA-DPB1	0.906732	0.906732	trans	0.009558	0.137477	1.30742	0.496152	0.659683	2.83388	1.97939	3.91676	1.80286	14.2103	0.52	4.95	3.24	6.58e-05	0.0128349	yes	up	lincRNA	LINC01857-201	ENSG00000224137.1_2	lincRNA	LINC01857	lncRNA	39.7417	87.841	80.108	45.7369	93.1218	102.349	142.648	178.256	132.921	274.728	69.31	166.18	1.26	1.58e-23	1.66e-20	yes	up	protein_coding	HLA-DPB1-211	ENSG00000223865.10_3	protein_coding	ENST00000418931.6
ENST00000429730.1	CYP1B1	0.906669	0.906669	trans	0.009558	0.137477	1.30742	0.496152	0.659683	2.83388	1.97939	3.91676	1.80286	14.2103	0.52	4.95	3.24	6.58e-05	0.0128349	yes	up	lincRNA	LINC01857-201	ENSG00000224137.1_2	lincRNA	LINC01857	lncRNA	4.05598	5.13931	4.39883	2.78659	2.05741	17.9153	30.0046	15.3453	15.4134	54.3234	3.69	26.6	2.85	1.33e-17	1.07e-14	yes	up	protein_coding	CYP1B1-205	ENSG00000138061.11_3	protein_coding	ENST00000610745.4
ENST00000446372.2	VEGFD	0.90648	0.90648	trans	2.34231	6.2857	6.12061	7.52794	5.40091	0.589612	0.588399	1.48897	3.68316	0.16996	5.54	1.3	-2.09	8.24e-06	0.00204015	yes	down	lincRNA	SFTA1P-203	ENSG00000225383.7_3	lincRNA	SFTA1P	lncRNA	8.9676	12.5446	17.001	16.4987	7.34885	1.70511	0.259827	1.75498	12.4627	0.013838	12.47	3.24	-1.94	9.97e-11	4.89e-08	yes	down	protein_coding	VEGFD-201	ENSG00000165197.4_3	protein_coding	ENST00000297904.3
ENST00000429730.1	HIST1H4J	0.90629	0.90629	trans	0.009558	0.137477	1.30742	0.496152	0.659683	2.83388	1.97939	3.91676	1.80286	14.2103	0.52	4.95	3.24	6.58e-05	0.0128349	yes	up	lincRNA	LINC01857-201	ENSG00000224137.1_2	lincRNA	LINC01857	lncRNA	4.59952	5.97521	7.99272	7.24263	10.5017	21.1026	26.2517	21.9979	8.67386	44.8489	7.26	24.57	1.76	3.27e-08	1.23e-05	yes	up	protein_coding	HIST1H4J-201	ENSG00000197238.4_3	protein_coding	ENST00000355057.2
MSTRG.93124.1	HIST1H4K	0.905986	0.905986	trans	0	0	0.049056	0	0.624409	37.3412	42.7296	22.7203	0.072424	295.269	0.13	79.63	9.21	3.81e-69	1.04e-65	yes	up	NovelLncRNA	ENST00000641978.1	MSTRG.93124	-	IGHG4	lncRNA	5.42752	6.96734	10.201	11.2196	12.5709	25.4969	31.3403	27.457	12.6499	56.994	9.28	30.79	1.73	1.14e-09	5.06e-07	yes	up	protein_coding	HIST1H4K-201	ENSG00000273542.1_2	protein_coding	ENST00000611927.1
ENST00000555688.1	CAVIN2	0.905776	0.905776	trans	8.38361	7.81955	3.70913	9.41734	5.15456	2.55299	3.05767	3.24749	4.463	1.78727	6.9	3.02	-1.19	0.000210106	0.035155	yes	down	lincRNA	LINC00641-202	ENSG00000258441.1_2	processed_transcript	LINC00641	lncRNA	77.7869	62.7301	58.6207	113.797	62.3512	11.0562	3.13501	29.2165	45.6145	3.57172	75.06	18.52	-2.02	9.37e-59	2.2e-55	yes	down	protein_coding	CAVIN2-201	ENSG00000168497.4_4	protein_coding	ENST00000304141.4
ENST00000624935.3	CRIP1	0.905663	0.905663	trans	0	0	0	0	0	21.9043	0	0	0	1.54592	0	4.69	8.88	2.52e-06	0.000689538	yes	up	processed_transcript	AC244205.1-201	ENSG00000240040.6_4	processed_transcript	AC244205.1	lncRNA	0.948284	0.428889	0	0	0	10.3484	1.50509	2.22317	4.00276	0	0.28	3.62	3.71	0.000250918	0.0408765	yes	up	protein_coding	CRIP1-202	ENSG00000213145.9_3	protein_coding	ENST00000392531.3
MSTRG.177316.1	CREB3L2	0.90523	0.90523	trans	2.48247	1.14692	5.21863	0.168674	0.607192	153.655	345.888	4.37876	0.887586	76.1135	1.92	116.18	5.92	1.47e-122	7.89e-119	yes	up	NovelLncRNA	ENST00000390325.2	MSTRG.177316	-	IGLC3	lncRNA	0.658279	0.973158	1.12619	1.76427	1.19974	1.99946	29.5811	0.7541	1.75362	1.28234	1.14	7.07	2.63	3.12e-05	0.00676701	yes	up	protein_coding	CREB3L2-201	ENSG00000182158.14_3	protein_coding	ENST00000330387.10
MSTRG.93125.4	ATF3	0.904769	0.904769	trans	0	0	0.009938	0	0	11.3823	10.3405	24.2382	0	53.3567	0	19.86	13.29	2.44e-10	1.15e-07	yes	up	NovelLncRNA	ENST00000641136.1	MSTRG.93125	-	IGHG3	lncRNA	0.174891	0.009611	0.00131	0.047888	0.127219	1.96629	2.95763	6.46387	0.052859	6.37558	0.07	3.56	5.63	3.99e-05	0.00834534	yes	up	protein_coding	ATF3-202	ENSG00000162772.16_4	protein_coding	ENST00000341491.8
MSTRG.93724.1	COL5A1	0.904673	0.904673	trans	0.023055	0.004473	0.006798	0.017749	0	3.27324	8.22979	0.350965	1.86885	1.34069	0.01	3.01	8.18	0.000306542	0.048384	yes	up	NovelLncRNA	ENST00000560830.1	MSTRG.93724	-	GREM1	lncRNA	5.65802	2.24428	2.42971	7.45053	4.1958	33.8215	91.1735	27.2418	9.42621	46.7395	4.4	41.68	3.25	5e-31	6.63e-28	yes	up	protein_coding	COL5A1-201	ENSG00000130635.15_3	protein_coding	ENST00000371817.7
ENST00000429730.1	SLC29A3	0.904456	0.904456	trans	0.009558	0.137477	1.30742	0.496152	0.659683	2.83388	1.97939	3.91676	1.80286	14.2103	0.52	4.95	3.24	6.58e-05	0.0128349	yes	up	lincRNA	LINC01857-201	ENSG00000224137.1_2	lincRNA	LINC01857	lncRNA	0	0.695689	0	0.689615	1.43049	3.55	4.19386	6.17894	1.04088	9.9215	0.56	4.98	3.14	8.53e-05	0.0161497	yes	up	protein_coding	SLC29A3-201	ENSG00000198246.7_3	protein_coding	ENST00000373189.5
ENST00000555688.1	TNFAIP1	0.904402	0.904402	trans	8.38361	7.81955	3.70913	9.41734	5.15456	2.55299	3.05767	3.24749	4.463	1.78727	6.9	3.02	-1.19	0.000210106	0.035155	yes	down	lincRNA	LINC00641-202	ENSG00000258441.1_2	processed_transcript	LINC00641	lncRNA	16.4913	13.7437	9.03487	25.8439	6.41316	4.15255	7.59755	4.51863	9.70804	5.43673	14.31	6.28	-1.19	9.84e-08	3.44e-05	yes	down	protein_coding	TNFAIP1-201	ENSG00000109079.9_3	protein_coding	ENST00000226225.6
ENST00000446372.2	ANOS1	0.904244	0.904244	trans	2.34231	6.2857	6.12061	7.52794	5.40091	0.589612	0.588399	1.48897	3.68316	0.16996	5.54	1.3	-2.09	8.24e-06	0.00204015	yes	down	lincRNA	SFTA1P-203	ENSG00000225383.7_3	lincRNA	SFTA1P	lncRNA	4.55025	12.408	10.6789	22.6791	15.642	1.1308	1.69497	2.89504	6.10892	4.84749	13.19	3.34	-1.98	1.86e-11	9.85e-09	yes	down	protein_coding	ANOS1-201	ENSG00000011201.11_3	protein_coding	ENST00000262648.7
ENST00000499098.1	RND1	0.904147	0.904147	trans	5.63234	7.51309	6.38303	9.98209	9.41123	1.83162	0.633777	3.68248	3.07844	1.3284	7.78	2.11	-1.88	4.99e-07	0.000154883	yes	down	antisense_RNA	AC096564.1-201	ENSG00000245293.2_4	antisense_RNA	AC096564.1	lncRNA	4.77178	8.52076	2.22654	8.6289	8.7649	1.98284	0.452642	0.998589	2.96711	0.615709	6.58	1.4	-2.23	5.2e-07	0.000160778	yes	down	protein_coding	RND1-201	ENSG00000172602.9_3	protein_coding	ENST00000309739.5
MSTRG.93724.1	CXCR4	0.903969	0.903969	trans	0.023055	0.004473	0.006798	0.017749	0	3.27324	8.22979	0.350965	1.86885	1.34069	0.01	3.01	8.18	0.000306542	0.048384	yes	up	NovelLncRNA	ENST00000560830.1	MSTRG.93724	-	GREM1	lncRNA	14.2153	13.5581	14.4106	23.0587	15.5701	72.4724	83.7175	20.1827	55.5963	37.7026	16.16	53.93	1.74	5.71e-16	4.11e-13	yes	up	protein_coding	CXCR4-201	ENSG00000121966.6_3	protein_coding	ENST00000241393.3
MSTRG.41926.9	B3GNT5	0.903966	0.903966	trans	9.33504	11.1079	5.11575	9.84899	8.73034	2.91356	1.08113	3.44851	4.45224	0.488951	8.83	2.48	-1.83	1.28e-07	4.4e-05	yes	down	NovelLncRNA	ENST00000227756.4	MSTRG.41926	-	GALNT18	lncRNA	10.0607	11.8649	5.36516	13.6089	8.7749	3.85878	5.27528	2.43469	4.10008	2.70775	9.93	3.68	-1.43	8.44e-07	0.000252267	yes	down	protein_coding	B3GNT5-201	ENSG00000176597.11_3	protein_coding	ENST00000326505.3
MSTRG.314097.1	TSPAN13	0.903898	0.903898	trans	4.65898	9.93307	9.31098	13.7654	5.81568	2.31171	5.05202	5.53953	4.65257	3.30734	8.7	4.17	-1.06	9.47e-05	0.0176488	yes	down	NovelLncRNA	ENST00000399959.6	MSTRG.314097	-	DDX3X	lncRNA	14.3192	35.3281	23.2397	41.8751	26.4128	5.01142	5.85114	7.02447	13.4394	5.40897	28.24	7.35	-1.94	2.38e-22	2.4e-19	yes	down	protein_coding	TSPAN13-201	ENSG00000106537.7_3	protein_coding	ENST00000262067.4
ENST00000429730.1	FERMT3	0.903782	0.903782	trans	0.009558	0.137477	1.30742	0.496152	0.659683	2.83388	1.97939	3.91676	1.80286	14.2103	0.52	4.95	3.24	6.58e-05	0.0128349	yes	up	lincRNA	LINC01857-201	ENSG00000224137.1_2	lincRNA	LINC01857	lncRNA	0	0	0	0	0.934079	3.86112	3.73112	4.59751	0	8.9246	0.19	4.22	4.5	1.98e-05	0.00452289	yes	up	protein_coding	FERMT3-201	ENSG00000149781.12_3	protein_coding	ENST00000279227.9
ENST00000602711.1	CAPG	0.903729	0.903729	trans	4.00317	4.84342	8.63375	2.49243	9.53212	18.1752	11.8053	24.306	7.31206	35.5636	5.9	19.43	1.72	1.54e-06	0.000439593	yes	up	sense_intronic	AC025857.2-201	ENSG00000269899.1_4	sense_intronic	AC025857.2	lncRNA	0	0	0	0	0	0	0	23.4077	0	34.6216	0	11.61	10.18	1.4e-13	8.81e-11	yes	up	protein_coding	CAPG-205	ENSG00000042493.15_3	protein_coding	ENST00000409921.5
ENST00000602711.1	C1QA	0.903427	0.903427	trans	4.00317	4.84342	8.63375	2.49243	9.53212	18.1752	11.8053	24.306	7.31206	35.5636	5.9	19.43	1.72	1.54e-06	0.000439593	yes	up	sense_intronic	AC025857.2-201	ENSG00000269899.1_4	sense_intronic	AC025857.2	lncRNA	13.1266	20.8573	21.8183	8.45116	15.9557	42.4369	52.3222	78.4939	13.3944	73.9089	16.04	52.11	1.7	7.18e-15	4.85e-12	yes	up	protein_coding	C1QA-201	ENSG00000173372.16_3	protein_coding	ENST00000374642.7
ENST00000602711.1	HLA-DQA1	0.903238	0.903238	trans	4.00317	4.84342	8.63375	2.49243	9.53212	18.1752	11.8053	24.306	7.31206	35.5636	5.9	19.43	1.72	1.54e-06	0.000439593	yes	up	sense_intronic	AC025857.2-201	ENSG00000269899.1_4	sense_intronic	AC025857.2	lncRNA	7.93165	2.10124	41.6337	5.27341	12.4582	20.9021	7.26334	101.101	15.5061	120.213	13.88	53	1.93	7.1e-19	6.12e-16	yes	up	protein_coding	HLA-DQA1-201	ENSG00000196735.11_3	protein_coding	ENST00000343139.9
ENST00000620635.1	HSPB8	0.903105	0.903105	trans	9.31867	6.5365	3.05319	6.65603	2.68266	1.47872	1.98479	2.08795	2.49397	1.36736	5.65	1.88	-1.59	8.94e-05	0.0168151	yes	down	lincRNA	AC068870.2-201	ENSG00000277782.1_3	lincRNA	AC068870.2	lncRNA	20.4106	18.4223	5.95722	26.5947	9.67198	4.12223	3.01292	6.39088	6.83486	3.61862	16.21	4.8	-1.76	2.5e-12	1.42e-09	yes	down	protein_coding	HSPB8-201	ENSG00000152137.6_3	protein_coding	ENST00000281938.6
MSTRG.93124.1	RPS26	0.902936	0.902936	trans	0	0	0.049056	0	0.624409	37.3412	42.7296	22.7203	0.072424	295.269	0.13	79.63	9.21	3.81e-69	1.04e-65	yes	up	NovelLncRNA	ENST00000641978.1	MSTRG.93124	-	IGHG4	lncRNA	0	0	0	0	0	0	0.012753	10.0875	0	21.7285	0	6.37	9.32	3.52e-08	1.32e-05	yes	up	protein_coding	RPS26-201	ENSG00000197728.9_3	protein_coding	ENST00000356464.9
ENST00000555688.1	MAMDC2	0.902729	0.902729	trans	8.38361	7.81955	3.70913	9.41734	5.15456	2.55299	3.05767	3.24749	4.463	1.78727	6.9	3.02	-1.19	0.000210106	0.035155	yes	down	lincRNA	LINC00641-202	ENSG00000258441.1_2	processed_transcript	LINC00641	lncRNA	12.0164	13.4333	10.2517	20.3471	11.623	0.729145	0.148974	5.35653	6.43966	0.321451	13.53	2.6	-2.38	1.22e-13	7.68e-11	yes	down	protein_coding	MAMDC2-201	ENSG00000165072.9_3	protein_coding	ENST00000377182.4
MSTRG.93124.1	CILP	0.902646	0.902646	trans	0	0	0.049056	0	0.624409	37.3412	42.7296	22.7203	0.072424	295.269	0.13	79.63	9.21	3.81e-69	1.04e-65	yes	up	NovelLncRNA	ENST00000641978.1	MSTRG.93124	-	IGHG4	lncRNA	5.45998	0.474559	0.758401	0.393324	0.151221	0.724886	4.40928	14.2844	3.57911	30.3732	1.45	10.67	2.88	5.03e-08	1.84e-05	yes	up	protein_coding	CILP-201	ENSG00000138615.5_3	protein_coding	ENST00000261883.5
ENST00000499732.2	FDCSP	0.902587	0.902587	trans	1.78534	1.21975	1.09341	0.284935	0.956033	117.242	0.001839	1.95945	0.523503	87.2442	1.07	41.39	5.28	7.89e-44	1.44e-40	yes	up	lincRNA	NEAT1-201	ENSG00000245532.7_3	lincRNA	NEAT1	lncRNA	0	0.155599	0.172723	0	0.600927	33.7914	3.65445	3.16854	10.0537	13.0794	0.19	12.75	6.1	5.93e-15	4.04e-12	yes	up	protein_coding	FDCSP-201	ENSG00000181617.5_3	protein_coding	ENST00000317987.5
ENST00000619688.1	MT1X	0.902415	0.902415	trans	19.7411	8.06963	5.19817	10.4252	3.24895	6.37826	6.44116	2.79646	4.20817	1.56931	9.34	4.28	-1.13	2.89e-05	0.00632325	yes	down	sense_intronic	AL159153.1-201	ENSG00000275611.1_4	sense_intronic	AL159153.1	lncRNA	502.791	89.64	24.5742	65.6959	44.7792	31.145	12.0973	32.1095	25.56	19.9938	145.5	24.18	-2.59	2.43e-140	1.55e-136	yes	down	protein_coding	MT1X-201	ENSG00000187193.8_3	protein_coding	ENST00000394485.4
ENST00000619688.1	MT1X	0.906843	0.902415	trans	19.7411	8.06963	5.19817	10.4252	3.24895	6.37826	6.44116	2.79646	4.20817	1.56931	9.34	4.28	-1.13	2.89e-05	0.00632325	yes	down	sense_intronic	AL159153.1-201	ENSG00000275611.1_4	sense_intronic	AL159153.1	lncRNA	502.791	89.64	24.5742	65.6959	44.7792	31.145	12.0973	32.1095	25.56	19.9938	145.5	24.18	-2.59	2.43e-140	1.55e-136	yes	down	protein_coding	MT1X-201	ENSG00000187193.8_3	protein_coding	ENST00000394485.4
ENST00000619688.1	MT2A	0.902221	0.902221	trans	19.7411	8.06963	5.19817	10.4252	3.24895	6.37826	6.44116	2.79646	4.20817	1.56931	9.34	4.28	-1.13	2.89e-05	0.00632325	yes	down	sense_intronic	AL159153.1-201	ENSG00000275611.1_4	sense_intronic	AL159153.1	lncRNA	1315.27	182.445	105.891	199.171	112.886	244.528	144.492	120.393	77.0489	122.932	383.13	141.88	-1.43	2.25e-205	2.13e-201	yes	down	protein_coding	MT2A-201	ENSG00000125148.6_3	protein_coding	ENST00000245185.5
MSTRG.177254.3	PI3	0.901687	0.901687	trans	0	0.115079	0.130311	0	0.114651	6.95054	18.0096	0.337577	0.131657	0.82908	0.07	5.25	6.19	5.45e-07	0.000168047	yes	up	NovelLncRNA	ENST00000390297.3	MSTRG.177254	-	IGLV1-44	lncRNA	1.35623	2.1623	0	1.59793	0.652373	30.8574	32.3052	0.491897	0.842644	0.246936	1.15	12.95	3.49	1.87e-11	9.87e-09	yes	up	protein_coding	PI3-201	ENSG00000124102.4_3	protein_coding	ENST00000243924.3
ENST00000555688.1	EDN1	0.901536	0.901536	trans	8.38361	7.81955	3.70913	9.41734	5.15456	2.55299	3.05767	3.24749	4.463	1.78727	6.9	3.02	-1.19	0.000210106	0.035155	yes	down	lincRNA	LINC00641-202	ENSG00000258441.1_2	processed_transcript	LINC00641	lncRNA	27.9371	48.4317	6.97775	50.4125	36.6091	7.15608	2.05805	4.06395	12.6671	0.256867	34.07	5.24	-2.7	2.05e-35	3.05e-32	yes	down	protein_coding	EDN1-201	ENSG00000078401.6_3	protein_coding	ENST00000379375.5
MSTRG.177254.3	GAS1	0.901487	0.901487	trans	0	0.115079	0.130311	0	0.114651	6.95054	18.0096	0.337577	0.131657	0.82908	0.07	5.25	6.19	5.45e-07	0.000168047	yes	up	NovelLncRNA	ENST00000390297.3	MSTRG.177254	-	IGLV1-44	lncRNA	0.207839	1.16795	2.90583	3.64424	0.555797	0.911021	33.2622	3.68746	4.72864	0.173667	1.7	8.55	2.33	2.83e-05	0.00620996	yes	up	protein_coding	GAS1-201	ENSG00000180447.6_3	protein_coding	ENST00000298743.8
ENST00000499732.2	RAP1B	0.901378	0.901378	trans	1.78534	1.21975	1.09341	0.284935	0.956033	117.242	0.001839	1.95945	0.523503	87.2442	1.07	41.39	5.28	7.89e-44	1.44e-40	yes	up	lincRNA	NEAT1-201	ENSG00000245532.7_3	lincRNA	NEAT1	lncRNA	0	0	0.212997	0	0	7.55178	2.98936	0	0	11.0061	0.04	4.31	6.66	6.13e-06	0.00156711	yes	up	protein_coding	RAP1B-228	ENSG00000127314.17_3	protein_coding	ENST00000542145.5
ENST00000602711.1	RPS26	0.901113	0.901113	trans	4.00317	4.84342	8.63375	2.49243	9.53212	18.1752	11.8053	24.306	7.31206	35.5636	5.9	19.43	1.72	1.54e-06	0.000439593	yes	up	sense_intronic	AC025857.2-201	ENSG00000269899.1_4	sense_intronic	AC025857.2	lncRNA	0	0	0	0	0	0	0.012753	10.0875	0	21.7285	0	6.37	9.32	3.52e-08	1.32e-05	yes	up	protein_coding	RPS26-201	ENSG00000197728.9_3	protein_coding	ENST00000356464.9
MSTRG.93125.4	IDO1	0.901071	0.901071	trans	0	0	0.009938	0	0	11.3823	10.3405	24.2382	0	53.3567	0	19.86	13.29	2.44e-10	1.15e-07	yes	up	NovelLncRNA	ENST00000641136.1	MSTRG.93125	-	IGHG3	lncRNA	0.542721	0	0.496255	1.24727	4.67477	11.7678	1.46125	8.19549	2.3467	19.866	1.39	8.73	2.65	3.3e-06	0.000883772	yes	up	protein_coding	IDO1-202	ENSG00000131203.12_3	protein_coding	ENST00000518237.5
ENST00000429730.1	PTAFR	0.900951	0.900951	trans	0.009558	0.137477	1.30742	0.496152	0.659683	2.83388	1.97939	3.91676	1.80286	14.2103	0.52	4.95	3.24	6.58e-05	0.0128349	yes	up	lincRNA	LINC01857-201	ENSG00000224137.1_2	lincRNA	LINC01857	lncRNA	0.622696	3.53627	1.24526	0	1.74117	7.88999	6.85614	7.69325	2.15416	15.4984	1.43	8.02	2.49	2.05e-05	0.0046705	yes	up	protein_coding	PTAFR-202	ENSG00000169403.11_3	protein_coding	ENST00000373857.7
ENST00000429730.1	PTAFR	0.930808	0.900951	trans	0.009558	0.137477	1.30742	0.496152	0.659683	2.83388	1.97939	3.91676	1.80286	14.2103	0.52	4.95	3.24	6.58e-05	0.0128349	yes	up	lincRNA	LINC01857-201	ENSG00000224137.1_2	lincRNA	LINC01857	lncRNA	0.622696	3.53627	1.24526	0	1.74117	7.88999	6.85614	7.69325	2.15416	15.4984	1.43	8.02	2.49	2.05e-05	0.0046705	yes	up	protein_coding	PTAFR-202	ENSG00000169403.11_3	protein_coding	ENST00000373857.7
ENST00000555688.1	ECSCR	0.900899	0.900899	trans	8.38361	7.81955	3.70913	9.41734	5.15456	2.55299	3.05767	3.24749	4.463	1.78727	6.9	3.02	-1.19	0.000210106	0.035155	yes	down	lincRNA	LINC00641-202	ENSG00000258441.1_2	processed_transcript	LINC00641	lncRNA	11.3417	10.5449	6.10288	18.2791	12.4079	3.21756	5.08386	4.7538	9.7707	2.58584	11.74	5.08	-1.21	1.1e-06	0.000323889	yes	down	protein_coding	ECSCR-002	ENSG00000249751.1	protein_coding	ENST00000515823.1
MSTRG.93125.4	RPL21	0.900887	0.900887	trans	0	0	0.009938	0	0	11.3823	10.3405	24.2382	0	53.3567	0	19.86	13.29	2.44e-10	1.15e-07	yes	up	NovelLncRNA	ENST00000641136.1	MSTRG.93125	-	IGHG3	lncRNA	0	0.664978	0.439041	0	0	1.99129	2.21839	2.20032	4.34721	23.8727	0.22	6.93	4.97	1.98e-08	7.65e-06	yes	up	protein_coding	RPL21-201	ENSG00000122026.10_3	protein_coding	ENST00000272274.8
MSTRG.93125.4	CTSK	0.900699	0.900699	trans	0	0	0.009938	0	0	11.3823	10.3405	24.2382	0	53.3567	0	19.86	13.29	2.44e-10	1.15e-07	yes	up	NovelLncRNA	ENST00000641136.1	MSTRG.93125	-	IGHG3	lncRNA	0.14005	0.127289	0.319544	1.99281	0.033167	0.762275	6.91983	4.7272	3.17994	109.226	0.52	24.96	5.58	1.71e-27	2.04e-24	yes	up	protein_coding	CTSK-201	ENSG00000143387.12_3	protein_coding	ENST00000271651.7
ENST00000429730.1	IDO1	0.900291	0.900291	trans	0.009558	0.137477	1.30742	0.496152	0.659683	2.83388	1.97939	3.91676	1.80286	14.2103	0.52	4.95	3.24	6.58e-05	0.0128349	yes	up	lincRNA	LINC01857-201	ENSG00000224137.1_2	lincRNA	LINC01857	lncRNA	0.542721	0	0.496255	1.24727	4.67477	11.7678	1.46125	8.19549	2.3467	19.866	1.39	8.73	2.65	3.3e-06	0.000883772	yes	up	protein_coding	IDO1-202	ENSG00000131203.12_3	protein_coding	ENST00000518237.5
MSTRG.246995.1	HLA-DMB	0.900287	0.900287	trans	0	0	2.55594	0	3.99632	6.06922	0	12.5767	1.35093	13.5371	1.31	6.71	2.36	0.000188021	0.0319724	yes	up	NovelLncRNA	ENST00000418931.6	MSTRG.246995	-	HLA-DPB1	lncRNA	3.49556	12.0651	12.1041	5.14825	12.3864	23.0102	16.8634	40.5221	14.5198	75.2086	9.04	34.02	1.91	1.93e-12	1.1e-09	yes	up	protein_coding	HLA-DMB-258	ENSG00000242574.8_3	protein_coding	ENST00000418107.2
MSTRG.246995.1	TSPAN33	0.900018	0.900018	trans	0	0	2.55594	0	3.99632	6.06922	0	12.5767	1.35093	13.5371	1.31	6.71	2.36	0.000188021	0.0319724	yes	up	NovelLncRNA	ENST00000418931.6	MSTRG.246995	-	HLA-DPB1	lncRNA	0.92887	0.617296	0.804045	1.04723	1.10259	5.43017	3.73588	7.44161	1.92495	9.16463	0.9	5.54	2.62	0.000234243	0.0385368	yes	up	protein_coding	TSPAN33-201	ENSG00000158457.5_3	protein_coding	ENST00000486685.2
ENST00000499098.1	HIST1H1D	-0.903446	-0.903446	trans	5.63234	7.51309	6.38303	9.98209	9.41123	1.83162	0.633777	3.68248	3.07844	1.3284	7.78	2.11	-1.88	4.99e-07	0.000154883	yes	down	antisense_RNA	AC096564.1-201	ENSG00000245293.2_4	antisense_RNA	AC096564.1	lncRNA	10.1908	4.73503	8.10926	9.43848	8.45115	24.7771	28.3841	17.0295	17.625	26.6021	8.18	22.88	1.48	7.76e-06	0.0019298	yes	up	protein_coding	HIST1H1D-201	ENSG00000124575.6_2	protein_coding	ENST00000244534.6
ENST00000499098.1	FCGR2A	-0.903656	-0.903656	trans	5.63234	7.51309	6.38303	9.98209	9.41123	1.83162	0.633777	3.68248	3.07844	1.3284	7.78	2.11	-1.88	4.99e-07	0.000154883	yes	down	antisense_RNA	AC096564.1-201	ENSG00000245293.2_4	antisense_RNA	AC096564.1	lncRNA	6.86595	7.86972	8.04116	2.94626	2.19281	17.9366	27.2668	7.60276	17.7235	18.4791	5.58	17.8	1.67	7.62e-06	0.00190077	yes	up	protein_coding	FCGR2A-202	ENSG00000143226.13_4	protein_coding	ENST00000367972.8
MSTRG.41926.9	HIST1H1D	-0.906189	-0.906189	trans	9.33504	11.1079	5.11575	9.84899	8.73034	2.91356	1.08113	3.44851	4.45224	0.488951	8.83	2.48	-1.83	1.28e-07	4.4e-05	yes	down	NovelLncRNA	ENST00000227756.4	MSTRG.41926	-	GALNT18	lncRNA	10.1908	4.73503	8.10926	9.43848	8.45115	24.7771	28.3841	17.0295	17.625	26.6021	8.18	22.88	1.48	7.76e-06	0.0019298	yes	up	protein_coding	HIST1H1D-201	ENSG00000124575.6_2	protein_coding	ENST00000244534.6
ENST00000589379.1	FCGR2A	-0.908362	-0.908362	trans	3.64998	2.721	2.25397	4.61814	4.11195	0.77509	0.121553	1.69942	0.766779	0.139955	3.47	0.7	-2.31	0.000212687	0.0354741	yes	down	antisense_RNA	AC011511.5-201	ENSG00000267607.1_3	antisense_RNA	AC011511.5	lncRNA	6.86595	7.86972	8.04116	2.94626	2.19281	17.9366	27.2668	7.60276	17.7235	18.4791	5.58	17.8	1.67	7.62e-06	0.00190077	yes	up	protein_coding	FCGR2A-202	ENSG00000143226.13_4	protein_coding	ENST00000367972.8
ENST00000456363.1	HIST2H4A	-0.914447	-0.914447	trans	17.8198	24.6725	35.0572	40.9557	32.1116	2.57261	1.99956	12.9551	28.5294	4.56757	30.12	10.12	-1.57	2.08e-19	1.84e-16	yes	down	antisense_RNA	AC093110.1-201	ENSG00000238018.2_3	antisense_RNA	AC093110.1	lncRNA	3.5818	2.30406	0.035747	0.899502	3.83065	12.3308	10.8841	6.83905	0.39389	13.9753	2.13	8.88	2.06	0.000120081	0.021738	yes	up	protein_coding	HIST2H4A-201	ENSG00000270882.2_3	protein_coding	ENST00000578186.2
MSTRG.41926.9	HDLBP	-0.914688	-0.914688	trans	9.33504	11.1079	5.11575	9.84899	8.73034	2.91356	1.08113	3.44851	4.45224	0.488951	8.83	2.48	-1.83	1.28e-07	4.4e-05	yes	down	NovelLncRNA	ENST00000227756.4	MSTRG.41926	-	GALNT18	lncRNA	2.90263	1.09659	5.35956	2.7945	6.10571	17.5769	30.824	28.7501	16.2288	35.5235	3.65	25.78	2.82	6.96e-17	5.32e-14	yes	up	protein_coding	HDLBP-204	ENSG00000115677.16_3	protein_coding	ENST00000391976.6
ENST00000499098.1	SH3PXD2B	-0.915848	-0.915848	trans	5.63234	7.51309	6.38303	9.98209	9.41123	1.83162	0.633777	3.68248	3.07844	1.3284	7.78	2.11	-1.88	4.99e-07	0.000154883	yes	down	antisense_RNA	AC096564.1-201	ENSG00000245293.2_4	antisense_RNA	AC096564.1	lncRNA	8.26357	4.42071	7.44831	7.53712	3.95694	19.2486	20.5262	17.416	13.0752	22.5005	6.33	18.55	1.55	2.35e-05	0.00528206	yes	up	protein_coding	SH3PXD2B-201	ENSG00000174705.12_3	protein_coding	ENST00000311601.5
ENST00000563635.5	HIST1H1D	-0.919469	-0.919469	trans	10.9089	23.6852	23.369	24.6353	21.4244	4.04301	1.77789	11.762	7.08141	3.94093	20.8	5.72	-1.86	3e-16	2.19e-13	yes	down	processed_transcript	AL137782.1-201	ENSG00000261553.5_4	processed_transcript	AL137782.1	lncRNA	10.1908	4.73503	8.10926	9.43848	8.45115	24.7771	28.3841	17.0295	17.625	26.6021	8.18	22.88	1.48	7.76e-06	0.0019298	yes	up	protein_coding	HIST1H1D-201	ENSG00000124575.6_2	protein_coding	ENST00000244534.6
MSTRG.41926.9	SH3PXD2B	-0.921914	-0.921914	trans	9.33504	11.1079	5.11575	9.84899	8.73034	2.91356	1.08113	3.44851	4.45224	0.488951	8.83	2.48	-1.83	1.28e-07	4.4e-05	yes	down	NovelLncRNA	ENST00000227756.4	MSTRG.41926	-	GALNT18	lncRNA	8.26357	4.42071	7.44831	7.53712	3.95694	19.2486	20.5262	17.416	13.0752	22.5005	6.33	18.55	1.55	2.35e-05	0.00528206	yes	up	protein_coding	SH3PXD2B-201	ENSG00000174705.12_3	protein_coding	ENST00000311601.5
[truncated: 1 more columns]
